# Supplementary material for: Simple and efficient nickel-catalyzed cross-coupling reaction of alkynylalanes with benzylic and aryl bromides
Source: Royal Society of Chemistry journal article supplement (doi:10.1039/c1cc14206b), 2011-01-01

**Electronic Supplementary Information (ESI)**

**Simple and Efficient Nickel-Catalyzed Cross-Coupling Reaction of Alkynylalanes with  
Benzylic and Aryl Bromides**

Deepak B. Biradar and Han-Mou Gau\*

*Department of Chemistry, National Chung Hsing University, Taichung 402, Taiwan,  
Republic of China*

e-mail: [hmgau@dragon.nchu.edu.tw](mailto:hmgau@dragon.nchu.edu.tw)

## Table of Contents

|            |                                                                                                              |     |
|------------|--------------------------------------------------------------------------------------------------------------|-----|
| <b>I</b>   | <b>Reagents and General Techniques</b>                                                                       | S4  |
| <b>II</b>  | <b>Physical measurements</b>                                                                                 | S4  |
| <b>III</b> | <b>General Procedures for the Preparation of the Alkynylalane Reagents</b>                                   | S4  |
| <b>IV</b>  | <b>General Procedures for the Coupling Reaction of Benzylic halides with Alkynylalanes</b>                   | S4  |
| <b>V</b>   | <b>General Procedures for the Coupling Reaction of Aryl halides with Alkynylalanes</b>                       | S4  |
| <b>VI</b>  | <b><sup>1</sup>H and <sup>13</sup>C NMR and High-resolution Mass Spectroscopic Data of Coupling Products</b> | S6  |
|            | 1. Prop-1-yne-1,3-diyl dibenzene ( <b>2a</b> )                                                               | S6  |
|            | 2. 1-methyl-2-(3-phenylprop-2-ynyl)benzene ( <b>2b</b> )                                                     | S6  |
|            | 3. 1-methyl-3-(3-phenylprop-2-ynyl)benzene ( <b>2c</b> )                                                     | S6  |
|            | 4. 1-methyl-4-(3-phenylprop-2-ynyl)benzene ( <b>2d</b> )                                                     | S6  |
|            | 5. 1-methoxy-3-(3-phenylprop-2-ynyl)benzene ( <b>2e</b> )                                                    | S6  |
|            | 6. Methyl(4-(3-phenylprop-2-ynyl)phenyl)sulfane ( <b>2f</b> )                                                | S6  |
|            | 7. 1-tert-butyl-4-(3-phenylprop-2-ynyl)benzene ( <b>2g</b> )                                                 | S7  |
|            | 8. 2-(3-phenylprop-2-ynyl)biphenyl ( <b>2h</b> )                                                             | S7  |
|            | 9. 3-(3-phenylprop-2-ynyl)biphenyl ( <b>2i</b> )                                                             | S7  |
|            | 10. 1,3-dimethoxy-5-(3-phenylprop-2-ynyl)benzene ( <b>2j</b> )                                               | S7  |
|            | 11. 1-chloro-4-(3-phenylprop-2-ynyl)benzene ( <b>2k</b> )                                                    | S7  |
|            | 12. 4-(3-phenylprop-2-ynyl)benzonitrile ( <b>2l</b> )                                                        | S7  |
|            | 13. 1-(3-phenylprop-2-ynyl)-3,5-bis(trifluoromethyl)benzene ( <b>2m</b> )                                    | S7  |
|            | 14. 2-(3-phenylprop-2-ynyl)thiophene ( <b>2n</b> )                                                           | S8  |
|            | 15. Hept-2-ynylbenzene ( <b>2o</b> )                                                                         | S8  |
|            | 16. (7-chlorohept-2-ynyl)benzene ( <b>2p</b> )                                                               | S8  |
|            | 17. 1,4-diphenylbut-2-yne ( <b>2q</b> )                                                                      | S8  |
|            | 18. 4-(3-(trimethylsilyl)prop-2-ynyl)benzonitrile ( <b>2r</b> )                                              | S8  |
|            | 19. 2-methyl-6-(3-(trimethylsilyl)prop-2-ynyl)pyridine ( <b>2s</b> )                                         | S8  |
|            | 20. 1,2-diphenylethyne ( <b>2t</b> )                                                                         | S8  |
|            | 21. 1-methyl-4-(phenylethynyl)benzene ( <b>2u</b> )                                                          | S8  |
|            | 22. 1,3-dimethyl-5-(phenylethynyl)benzene ( <b>2v</b> )                                                      | S9  |
|            | 23. trimethyl(4-(phenylethynyl)phenyl)silane ( <b>2w</b> )                                                   | S9  |
|            | 24. 1-fluoro-4-(phenylethynyl)benzene ( <b>2x</b> )                                                          | S9  |
|            | 25. 4-(phenylethynyl)benzonitrile ( <b>2y</b> )                                                              | S9  |
| <b>VII</b> | <b><sup>1</sup>H and <sup>13</sup>C NMR Spectra of Coupling Products</b>                                     | S10 |

|     |                                                                       |     |
|-----|-----------------------------------------------------------------------|-----|
| 1.  | Prop-1-yne-1,3-diyl dibenzene ( <b>2a</b> )                           | S10 |
| 2.  | 1-methyl-2-(3-phenylprop-2-ynyl)benzene ( <b>2b</b> )                 | S12 |
| 3.  | 1-methyl-3-(3-phenylprop-2-ynyl)benzene ( <b>2c</b> )                 | S14 |
| 4.  | 1-methyl-4-(3-phenylprop-2-ynyl)benzene ( <b>2d</b> )                 | S16 |
| 5.  | 1-methoxy-3-(3-phenylprop-2-ynyl)benzene ( <b>2e</b> )                | S18 |
| 6.  | Methyl(4-(3-phenylprop-2-ynyl)phenyl)sulfane ( <b>2f</b> )            | S20 |
| 7.  | 1-tert-butyl-4-(3-phenylprop-2-ynyl)benzene ( <b>2g</b> )             | S22 |
| 8.  | 2-(3-phenylprop-2-ynyl)biphenyl ( <b>2h</b> )                         | S24 |
| 9.  | 3-(3-phenylprop-2-ynyl)biphenyl ( <b>2i</b> )                         | S26 |
| 10. | 1,3-dimethoxy-5-(3-phenylprop-2-ynyl)benzene ( <b>2j</b> )            | S28 |
| 11. | 1-chloro-4-(3-phenylprop-2-ynyl)benzene ( <b>2k</b> )                 | S30 |
| 12. | 4-(3-phenylprop-2-ynyl)benzonitrile ( <b>2l</b> )                     | S32 |
| 13. | 1-(3-phenylprop-2-ynyl)-3,5-bis(trifluoromethyl)benzene ( <b>2m</b> ) | S34 |
| 14. | 2-(3-phenylprop-2-ynyl)thiophene ( <b>2n</b> )                        | S36 |
| 15. | Hept-2-ynylbenzene ( <b>2o</b> )                                      | S38 |
| 16. | (7-chlorohept-2-ynyl)benzene ( <b>2p</b> )                            | S40 |
| 17. | 1,4-diphenylbut-2-yne ( <b>2q</b> )                                   | S42 |
| 18. | 4-(3-(trimethylsilyl)prop-2-ynyl)benzonitrile ( <b>2r</b> )           | S44 |
| 19. | 2-methyl-6-(3-(trimethylsilyl)prop-2-ynyl)pyridine ( <b>2s</b> )      | S46 |
| 20. | 1,2-diphenylethyne ( <b>2t</b> )                                      | S48 |
| 21. | 1-methyl-4-(phenylethynyl)benzene ( <b>2u</b> )                       | S50 |
| 22. | 1,3-dimethyl-5-(phenylethynyl)benzene ( <b>2v</b> )                   | S52 |
| 23. | trimethyl(4-(phenylethynyl)phenyl)silane ( <b>2w</b> )                | S54 |
| 24. | 1-fluoro-4-(phenylethynyl)benzene ( <b>2x</b> )                       | S56 |
| 25. | 4-(phenylethynyl)benzonitrile ( <b>2y</b> )                           | S58 |

## I. Reagents and General Techniques

All solvents were dried by refluxing for at least 24 h over  $P_2O_5$  (dichloromethane) or sodium-benzophenone and were freshly distilled prior to use. All synthesis and manipulations were carried out under a dry nitrogen atmosphere.

## II. Physical measurements

$^1H$  and  $^{13}C$  NMR spectra were obtained with a Varian Mercury-400 ( $^1H$ , 400 MHz;  $^{13}C$ , 100 MHz) spectrometer, and chemical shifts were measured relative to tetramethylsilane (0.00 ppm) as the internal reference. Mass spectroscopy were performed by using Finnigan MAT 95 XL ThermoQuest Mass Spectrometer.

## III. General Procedures for the Preparation of the Alkynylalane Reagents

To a cooled (0 °C) solution of an alkyne (1.5 mmol) in hexane (3 mL) was added *n*-BuLi (1.5 mmol, 2.5 M in hexane) and stirred for 20 min, followed by an addition of  $AlEt_2Cl$  (1.5 mmol, 1 M in hexane). The mixture thus obtained had been stirred at 0 °C for 20 min and then at room temperature for 2 h. The resulted solution was filtered, followed by an evaporation of hexane under reduced pressures and then added 2 mL of dry diethyl ether to give a alkynylaluminum reagent which was used in the coupling reactions.

## IV. General Procedures for the Coupling Reaction of Benzylic Halides with Alkynylalanes Catalyzed by $NiCl_2(PPh_3)_2$

Under a dry nitrogen atmosphere,  $NiCl_2(PPh_3)_2$  (0.0262 g, 0.0400 mmol) and alkynylaluminum reagent (1.5 mmol) were mixed in 3 mL dry diethyl ether at room temperature and stirred the mixture for 15 min, followed by an addition of benzylic bromide (1.00 mmol). After stirring for 1 h, the reaction mixture was quenched by aqueous hydrochloric acid (3 M). The organic layer was separated, and the aqueous layer was extracted with hexane or ether. The combined organic phase was dried over  $MgSO_4$ , filtered, and concentrated. The residue was purified by column chromatography to give the products

## V. General Procedures for the Coupling Reaction of Aryl Halides with Alkynylalanes Catalyzed by $NiCl_2(PPh_3)_2$

Under a dry nitrogen atmosphere,  $NiCl_2(PPh_3)_2$  (0.0262 g, 0.0400 mmol) and alkynylaluminum reagent (1.5 mmol) were mixed in 3 mL dry DME at room temperature and stirred the mixture for 15 min, followed by an addition of Aryl bromide (1.00 mmol). After stirring for 4 h at 80 °C, the reaction mixture was allowed to cool down to room temperature and then quenched by aqueous hydrochloric acid (3 M). The organic layer was separated, and the aqueous layer was extracted with hexane or ether. The combined organic phase was dried over  $MgSO_4$ , filtered, and concentrated. The residue was purified by column chromatography

to give the products.

## VI. $^1\text{H}$ and $^{13}\text{C}$ NMR and High-resolution Mass Spectroscopic Data of Coupling Products

- 1. Prop-1-yne-1,3-diyl dibenzene (2a):**  $^1\text{H}$  NMR (400 MHz,  $\text{CDCl}_3$ ):  $\delta$  7.47-7.41 (m, 4H), 7.37-7.23 (m, 6H), 3.84 (s, 2H) ppm.  $^{13}\text{C}\{^1\text{H}\}$  NMR (100 MHz,  $\text{CDCl}_3$ ):  $\delta$  136.8, 131.6, 128.5, 128.2, 128.0, 127.8, 126.6, 123.7, 87.5, 82.7, 25.7 ppm. HRMS calculated for  $\text{C}_{15}\text{H}_{12}$  [ $\text{M}^+$ ]: 192.0939, found 192.0943.
- 2. 1-methyl-2-(3-phenylprop-2-ynyl)benzene (2b):**  $^1\text{H}$  NMR (400 MHz,  $\text{CDCl}_3$ ):  $\delta$  7.51 (d,  $J = 6.4$  Hz, 1H), 7.46-7.41 (m, 2H), 7.32-7.27 (m, 3H), 7.25-7.17 (m, 3H), 3.75 (s, 2H), 2.38 (s, 3H) ppm.  $^{13}\text{C}\{^1\text{H}\}$  NMR (100 MHz,  $\text{CDCl}_3$ ):  $\delta$  136.0, 135.0, 131.6, 130.1, 128.3, 128.2, 127.7, 126.9, 126.2, 123.7, 87.2, 82.7, 23.9, 19.3 ppm. HRMS calculated for  $\text{C}_{16}\text{H}_{14}$  [ $\text{M}^+$ ]: 206.1096, found 206.1092.
- 3. 1-methyl-3-(3-phenylprop-2-ynyl)benzene (2c):**  $^1\text{H}$  NMR (400 MHz,  $\text{CDCl}_3$ ):  $\delta$  7.47-7.43 (m, 2H), 7.32-7.28 (m, 3H), 7.26-7.21 (m, 3H), 7.09-7.05 (m, 1H), 3.80 (s, 2H), 2.36 (s, 3H) ppm.  $^{13}\text{C}\{^1\text{H}\}$  NMR (100 MHz,  $\text{CDCl}_3$ ):  $\delta$  138.2, 136.6, 131.6, 128.7, 128.4, 128.2, 127.8, 127.4, 125.0, 123.7, 87.7, 82.5, 25.6, 21.4 ppm. HRMS calculated for  $\text{C}_{16}\text{H}_{14}$  [ $\text{M}^+$ ]: 206.1096, found 206.1088.
- 4. 1-methyl-4-(3-phenylprop-2-ynyl)benzene (2d):**  $^1\text{H}$  NMR (400 MHz,  $\text{CDCl}_3$ ):  $\delta$  7.46-7.42 (m, 2H), 7.32-7.26 (m, 5H), 7.14 (d,  $J = 7.6$  Hz, 2H), 3.79 (s, 2H), 2.34 (s, 3H) ppm.  $^{13}\text{C}\{^1\text{H}\}$  NMR (100 MHz,  $\text{CDCl}_3$ ):  $\delta$  136.2, 133.7, 131.6, 129.2, 128.2, 127.8, 127.7, 123.8, 87.8, 82.4, 25.3, 21.0 ppm. HRMS calculated for  $\text{C}_{16}\text{H}_{14}$  [ $\text{M}^+$ ]: 206.1096, found 206.1088.
- 5. 1-methoxy-3-(3-phenylprop-2-ynyl)benzene (2e):**  $^1\text{H}$  NMR (400 MHz,  $\text{CDCl}_3$ ):  $\delta$  7.46-7.44 (m, 2H), 7.31-7.25 (m, 4H), 7.01-6.98 (m, 2H), 6.81-6.77 (m, 1H), 3.81 (s, 5H) ppm.  $^{13}\text{C}\{^1\text{H}\}$  NMR (100 MHz,  $\text{CDCl}_3$ ):  $\delta$  159.8, 138.3, 131.6, 129.5, 128.2, 127.8, 123.6, 120.3, 113.7, 112.0, 87.3, 82.7, 55.2, 25.7 ppm. HRMS calculated for  $\text{C}_{16}\text{H}_{14}\text{O}$  [ $\text{M}^+$ ]: 222.1045, found 222.1051.
- 6. Methyl(4-(3-phenylprop-2-ynyl)phenyl)sulfane (2f):**  $^1\text{H}$  NMR (400 MHz,  $\text{CDCl}_3$ ):  $\delta$  7.46-7.43 (m, 2H), 7.36-7.32 (m, 2H), 7.31-7.29 (m, 3H), 7.27-7.24 (m, 2H), 3.80 (s, 2H), 2.49 (s, 3H) ppm.  $^{13}\text{C}\{^1\text{H}\}$  NMR (100 MHz,  $\text{CDCl}_3$ ):  $\delta$  136.4, 133.7, 131.6, 128.4, 128.2, 127.8, 127.0, 123.5, 87.3, 82.6, 25.2, 16.1 ppm. HRMS calculated for  $\text{C}_{16}\text{H}_{14}\text{S}$  [ $\text{M}^+$ ]: 238.0816, found 238.0824.

- 7. 1-tert-butyl-4-(3-phenylprop-2-ynyl)benzene (2g):**  $^1\text{H}$  NMR (400 MHz,  $\text{CDCl}_3$ ):  $\delta$  7.46-7.43 (m, 2H), 7.39-7.33 (m, 4H), 7.31-7.27 (m, 3H), 3.81 (s, 2H) 1.32 (s, 9H) ppm.  $^{13}\text{C}\{^1\text{H}\}$  NMR (100 MHz,  $\text{CDCl}_3$ ):  $\delta$  149.5, 133.7, 131.6, 128.2, 127.7, 127.6, 125.5, 123.7, 87.8, 82.4, 34.4, 31.4, 25.2 ppm. HRMS calculated for  $\text{C}_{19}\text{H}_{20}$  [ $\text{M}^+$ ]: 248.1565, found 248.1570.
- 8. 2-(3-phenylprop-2-ynyl)biphenyl (2h):**  $^1\text{H}$  NMR (400 MHz,  $\text{CDCl}_3$ ):  $\delta$  7.71-7.68 (m, 1H), 7.46-7.25 (m, 13H), 3.72 (s, 2H) ppm.  $^{13}\text{C}\{^1\text{H}\}$  NMR (100 MHz,  $\text{CDCl}_3$ ):  $\delta$  141.5, 141.0, 134.3, 131.6, 130.0, 129.2, 129.0, 128.4, 128.24, 128.17, 127.7, 127.1, 126.7, 123.7, 88.2, 82.5, 24.1 ppm. HRMS calculated for  $\text{C}_{21}\text{H}_{16}$  [ $\text{M}^+$ ]: 268.1252, found 268.1262.
- 9. 3-(3-phenylprop-2-ynyl)biphenyl (2i):**  $^1\text{H}$  NMR (400 MHz,  $\text{CDCl}_3$ ):  $\delta$  7.65-7.59 (m, 3H), 7.51-7.40 (m, 7H), 7.38-7.28 (m, 4H), 3.91 (s, 2H) ppm.  $^{13}\text{C}\{^1\text{H}\}$  NMR (100 MHz,  $\text{CDCl}_3$ ):  $\delta$  141.5, 141.0, 137.2, 131.6, 129.0, 128.7, 128.2, 127.8, 127.3, 127.2, 126.9, 126.8, 125.5, 123.6, 87.4, 82.8, 25.8 ppm. HRMS calculated for  $\text{C}_{21}\text{H}_{16}$  [ $\text{M}^+$ ]: 268.1252, found 268.1261.
- 10. 1,3-dimethoxy-5-(3-phenylprop-2-ynyl)benzene (2j):**  $^1\text{H}$  NMR (400 MHz,  $\text{CDCl}_3$ ):  $\delta$  7.46-7.43 (m, 2H), 7.31-7.28 (m, 3H), 6.60-6.58 (m, 2H), 6.36 (t,  $J = 2.4$  Hz, 1H), 3.80 (s, 6H), 3.78 (s, 2H) ppm.  $^{13}\text{C}\{^1\text{H}\}$  NMR (100 MHz,  $\text{CDCl}_3$ ):  $\delta$  160.8, 139.0, 131.6, 128.2, 127.8, 123.6, 106.0, 98.6, 87.2, 82.7, 55.2, 25.9 ppm. HRMS calculated for  $\text{C}_{17}\text{H}_{16}\text{O}_2$  [ $\text{M}^+$ ]: 252.1150, found 252.1153.
- 11. 1-chloro-4-(3-phenylprop-2-ynyl)benzene (2k):**  $^1\text{H}$  NMR (400 MHz,  $\text{CDCl}_3$ ):  $\delta$  7.46-7.42 (m, 2H), 7.37-7.28 (m, 7H), 3.80 (s, 2H) ppm.  $^{13}\text{C}\{^1\text{H}\}$  NMR (100 MHz,  $\text{CDCl}_3$ ):  $\delta$  135.2, 132.4, 131.6, 129.3, 128.6, 128.3, 128.0, 123.4, 86.8, 83.0, 25.2 ppm. HRMS calculated for  $\text{C}_{15}\text{H}_{11}\text{Cl}$  [ $\text{M}^+$ ]: 226.0549, found 226.0557.
- 12. 4-(3-phenylprop-2-ynyl)benzonitrile (2l):**  $^1\text{H}$  NMR (400 MHz,  $\text{CDCl}_3$ ):  $\delta$  7.66-7.63 (m, 2H), 7.56-7.52 (m, 2H), 7.47-7.43 (m, 2H), 7.34-7.30 (m, 3H), 3.90 (s, 2H) ppm.  $^{13}\text{C}\{^1\text{H}\}$  NMR (100 MHz,  $\text{CDCl}_3$ ):  $\delta$  142.3, 132.3, 131.6, 128.7, 128.3, 128.2, 123.0, 118.8, 110.7, 85.5, 83.7, 25.9 ppm. HRMS calculated for  $\text{C}_{16}\text{H}_{11}\text{N}$  [ $\text{M}^+$ ]: 217.0891, found 217.0886.
- 13. 1-(3-phenylprop-2-ynyl)-3,5-bis(trifluoromethyl)benzene (2m):**  $^1\text{H}$  NMR (400 MHz,  $\text{CDCl}_3$ ):  $\delta$  7.89 (s, 2H), 7.79 (s, 1H), 7.48-7.43 (m, 2H), 7.35-7.32 (m, 3H), 3.97 (s, 3H) ppm.  $^{13}\text{C}\{^1\text{H}\}$  NMR (100 MHz,  $\text{CDCl}_3$ ):  $\delta$  139.3, 132.5, 132.0, 131.7, 128.3 (m), 128.2 (m), 123.3 (q,  $J = 270$  Hz), 122.9, 120.8 (m), 84.9, 84.2, 25.5 ppm. HRMS calculated for

$C_{17}H_{10}F_6$  [ $M^+$ ]: 328.0687, found 328.0681.

- 14. 2-(3-phenylprop-2-ynyl)thiophene (2n):**  $^1H$  NMR (400 MHz,  $CDCl_3$ ):  $\delta$  7.47-7.43 (m, 2H), 7.32-7.28 (t, 3H), 7.21-7.18 (m, 1H), 7.04-7.01 (m, 1H), 6.98-6.95 (m, 1H), 3.99 (s, 2H) ppm.  $^{13}C\{^1H\}$  NMR (100 MHz,  $CDCl_3$ ):  $\delta$  139.5, 131.6, 128.2, 128.0, 126.8, 125.0, 124.1, 123.3, 86.7, 82.3, 20.6 ppm. HRMS calculated for  $C_{13}H_{10}S$  [ $M^+$ ]: 198.0503, found 198.0500.
- 15. Hept-2-ynylbenzene (2o):**  $^1H$  NMR (400 MHz,  $CDCl_3$ ):  $\delta$  7.37-7.28 (m, 4H), 7.27-7.19 (m, 1H), 3.58 (t,  $J = 2.0$  Hz, 2H), 2.26-2.20 (m, 2H), 1.57-1.38 (m, 4H), 0.92 (t,  $J = 7.6$  Hz, 3H) ppm.  $^{13}C\{^1H\}$  NMR (100 MHz,  $CDCl_3$ ):  $\delta$  137.6, 128.4, 127.8, 126.3, 82.6, 77.4, 31.1, 25.1, 22.0, 18.5, 13.6 ppm.
- 16. (7-chlorohept-2-ynyl)benzene (2p):**  $^1H$  NMR (400 MHz,  $CDCl_3$ ):  $\delta$  7.35-7.19 (m, 5H), 3.57 (s, 2H), 3.57-3.53 (m, 2H), 2.30-2.23 (m, 2H), 1.94-1.86 (m, 2H), 1.71-1.63 (m, 2H) ppm.  $^{13}C\{^1H\}$  NMR (100 MHz,  $CDCl_3$ ):  $\delta$  137.3, 128.4, 127.8, 126.4, 81.6, 78.2, 44.6, 31.5, 26.1, 25.0, 18.1 ppm. HRMS calculated for  $C_{13}H_{15}Cl$  [ $M^+$ ]: 206.0862, found 206.0855.
- 17. 1,4-diphenylbut-2-yne (2q):**  $^1H$  NMR (400 MHz,  $CDCl_3$ ):  $\delta$  7.39-7.35 (m, 4H), 7.34-7.29 (m, 4H), 7.25-7.20 (m, 2H), 3.65 (s, 4H) ppm.  $^{13}C\{^1H\}$  NMR (100 MHz,  $CDCl_3$ ):  $\delta$  137.3, 128.4, 127.9, 126.5, 79.9, 25.2 ppm.
- 18. 4-(3-(trimethylsilyl)prop-2-ynyl)benzonitrile (2r):**  $^1H$  NMR (400 MHz,  $CDCl_3$ ):  $\delta$  7.62 (dt,  $J = 1.6, 8.4$  Hz, 2H), 7.48-7.44 (m, 2H), 3.71 (s, 2H), 0.20 (s, 9H) ppm.  $^{13}C\{^1H\}$  NMR (100 MHz,  $CDCl_3$ ):  $\delta$  141.9, 132.3, 128.6, 118.8, 110.6, 102.1, 88.4, 26.3, -0.07 ppm. HRMS calculated for  $C_{13}H_{15}SiN$  [ $M^+$ ]: 213.0974, found 213.0983.
- 19. 2-methyl-6-(3-(trimethylsilyl)prop-2-ynyl)pyridine (2s):**  $^1H$  NMR (400 MHz,  $CDCl_3$ ):  $\delta$  7.58 (t,  $J = 8.0$  Hz, 1H), 7.37 (d,  $J = 7.6$  Hz, 1H), 7.02 (d,  $J = 7.6$  Hz, 1H), 3.81 (s, 2H), 2.53 (s, 3H), 0.20 (s, 9H) ppm.  $^{13}C\{^1H\}$  NMR (100 MHz,  $CDCl_3$ ):  $\delta$  157.8, 155.9, 137.0, 121.2, 118.7, 103.1, 87.8, 29.3, 24.4, 0.03 ppm. HRMS calculated for  $C_{12}H_{17}NSi$  [ $M^+$ ]: 203.1130, found 203.1127.
- 20. 1,2-diphenylethyne (2t):**  $^1H$  NMR (400 MHz,  $CDCl_3$ ):  $\delta$  7.55-7.50 (m, 4H), 7.36-7.30 (m, 6H) ppm.  $^{13}C\{^1H\}$  NMR (100 MHz,  $CDCl_3$ ):  $\delta$  131.6, 128.3, 128.2, 123.3, 89.4 ppm.
- 21. 1-methyl-4-(phenylethynyl)benzene (2u):**  $^1H$  NMR (400 MHz,  $CDCl_3$ ):  $\delta$  7.54-7.50 (m,

2H), 7.43 (d,  $J = 8.0$  Hz, 2H), 7.37-7.30 (m, 3H), 7.16 (d,  $J = 8.0$  Hz, 2H), 2.37 (s, 3H) ppm.  $^{13}\text{C}\{^1\text{H}\}$  NMR (100 MHz,  $\text{CDCl}_3$ ):  $\delta$  138.4, 131.54, 131.49, 129.1, 128.3, 128.1, 123.5, 120.2, 89.5, 88.7, 21.5 ppm.

**22. 1,3-dimethyl-5-(phenylethynyl)benzene (2v):**  $^1\text{H}$  NMR (400 MHz,  $\text{CDCl}_3$ ):  $\delta$  7.54-7.49 (m, 2H), 7.37-7.31 (m, 3H), 7.17 (m, 2H), 6.97 (s, 1H), 2.31 (s, 6H) ppm.  $^{13}\text{C}\{^1\text{H}\}$  NMR (100 MHz,  $\text{CDCl}_3$ ):  $\delta$  137.9, 131.5, 130.2, 129.3, 128.3, 128.1, 123.4, 122.8, 89.7, 88.7, 21.1 ppm.

**23. trimethyl(4-(phenylethynyl)phenyl)silane (2w):**  $^1\text{H}$  NMR (400 MHz,  $\text{CDCl}_3$ ):  $\delta$  7.55-7.52 (m, 2H), 7.50 (s, 4H), 7.37-7.33 (m, 3H), 0.28 (s, 9H) ppm.  $^{13}\text{C}\{^1\text{H}\}$  NMR (100 MHz,  $\text{CDCl}_3$ ):  $\delta$  141.0, 133.2, 131.6, 130.7, 128.3, 128.2, 123.6, 123.3, 89.8, 89.6, -1.2 ppm.

**24. 1-fluoro-4-(phenylethynyl)benzene (2x):**  $^1\text{H}$  NMR (400 MHz,  $\text{CDCl}_3$ ):  $\delta$  7.55-7.48 (m, 4H), 7.38-7.32 (m, 3H), 7.07-7.01 (m, 2H) ppm.  $^{13}\text{C}\{^1\text{H}\}$  NMR (100 MHz,  $\text{CDCl}_3$ ):  $\delta$  162.4 (d,  $J = 248$  Hz), 133.4 (d,  $J = 8.6$  Hz), 131.5, 128.3 (d,  $J = 3.9$  Hz), 123.0, 119.3 (d,  $J = 3.9$  Hz), 115.7, 115.5, 89.0 (d,  $J = 1.6$  Hz), 88.3 ppm.

**25. 4-(phenylethynyl)benzonitrile (2y):**  $^1\text{H}$  NMR (400 MHz,  $\text{CDCl}_3$ ):  $\delta$  7.66-7.59 (m, 4H), 7.57-7.53 (m, 2H), 7.41-7.36 (m, 3H) ppm.  $^{13}\text{C}\{^1\text{H}\}$  NMR (100 MHz,  $\text{CDCl}_3$ ):  $\delta$  132.04, 132.02, 131.8, 129.1, 128.5, 128.2, 122.2, 118.5, 111.4, 93.7, 87.7 ppm.

## VII. $^1\text{H}$ and $^{13}\text{C}$ NMR Spectra of Coupling Products

### 1. Prop-1-yne-1,3-diylidibenzene (**2a**)

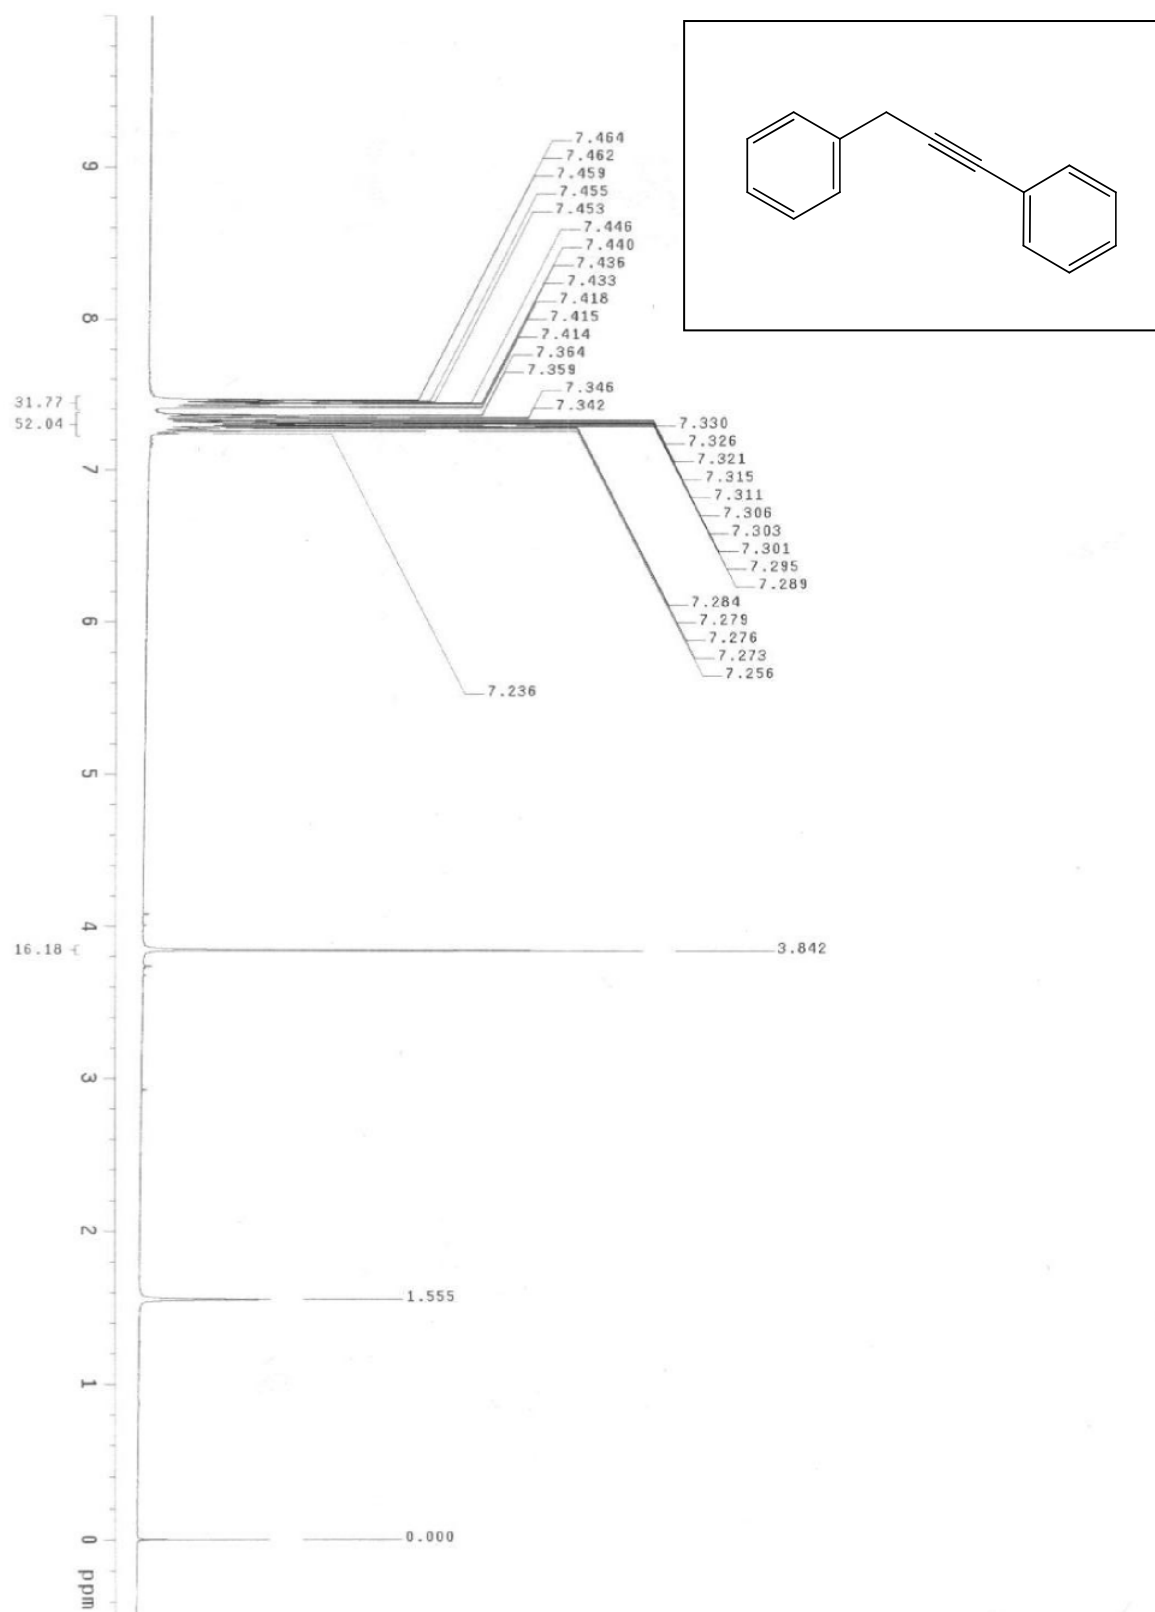

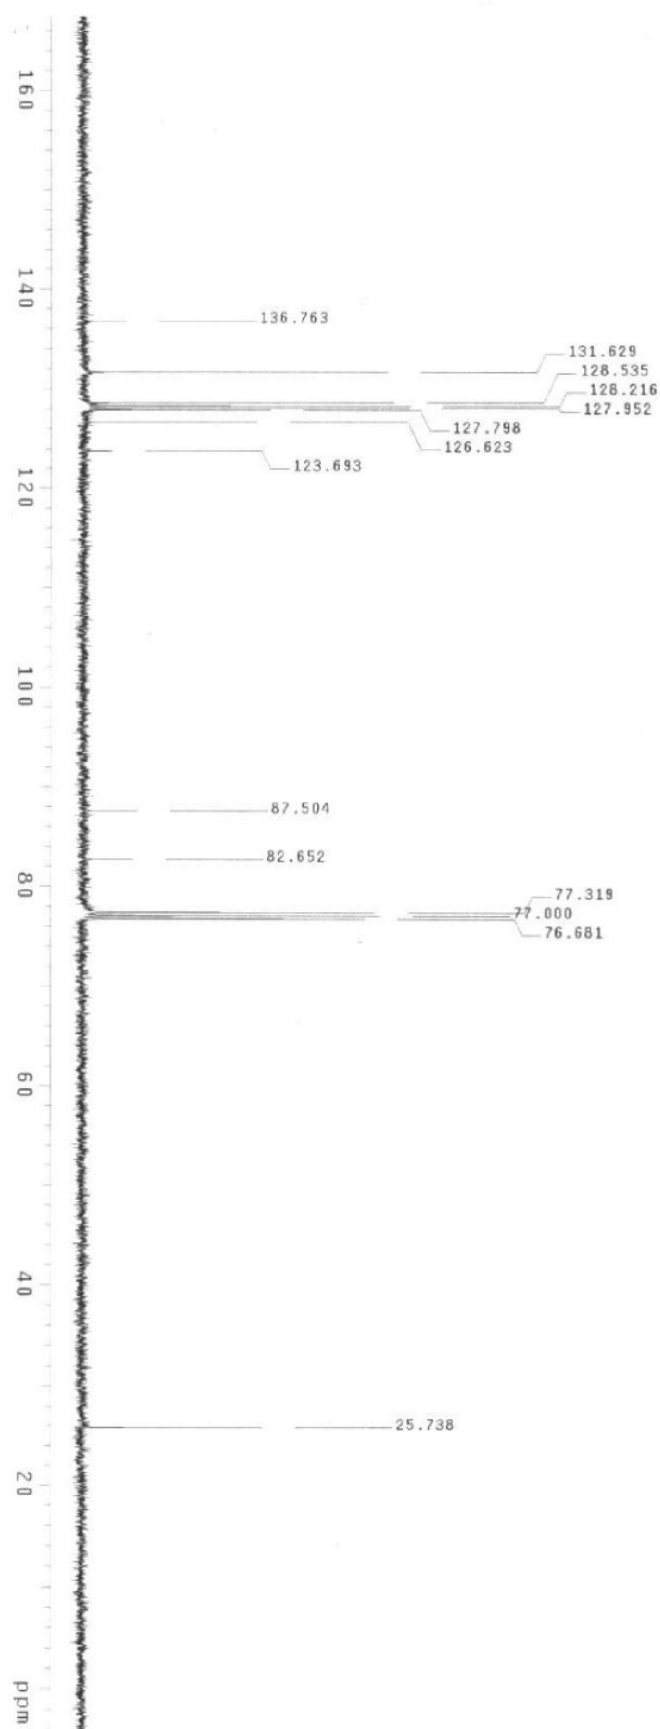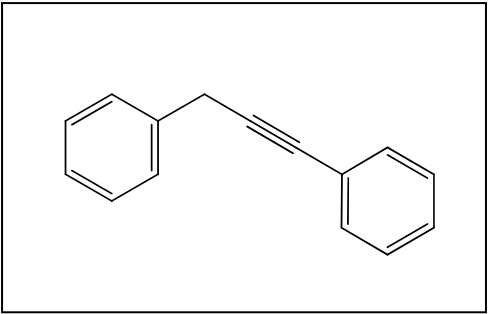

2. 1-methyl-2-(3-phenylprop-2-ynyl)benzene (**2b**)

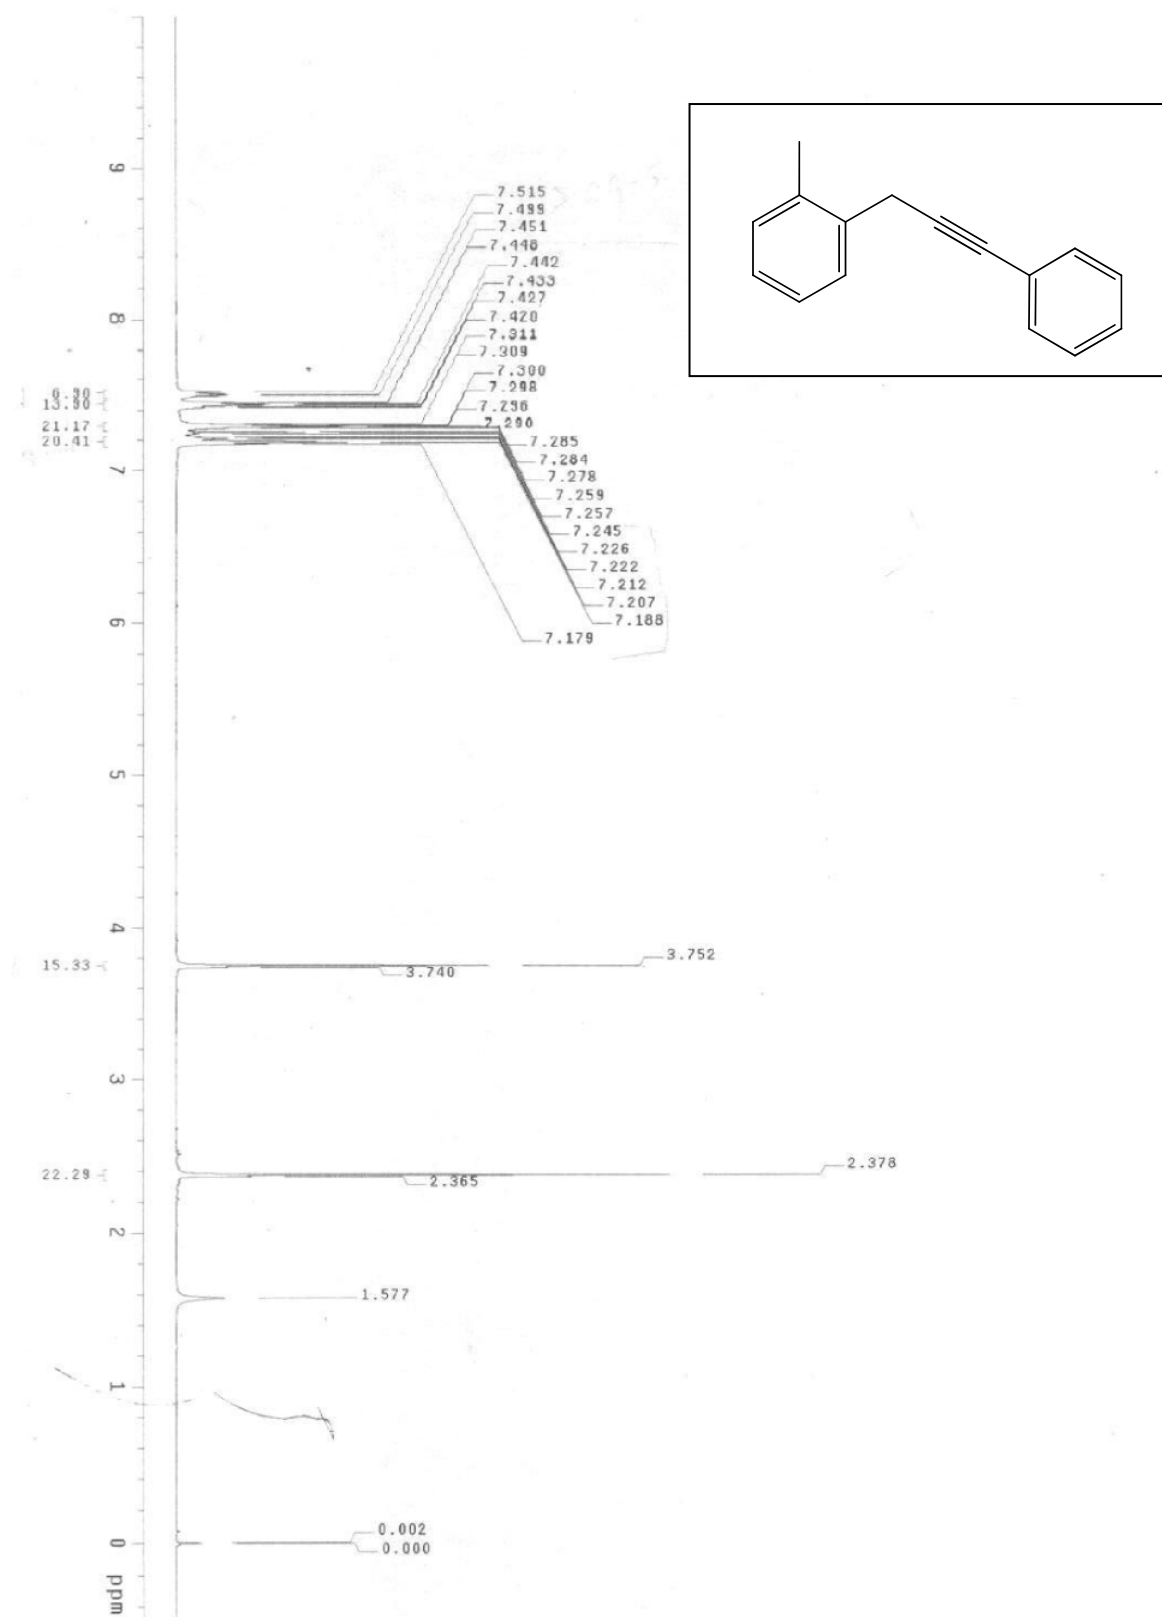

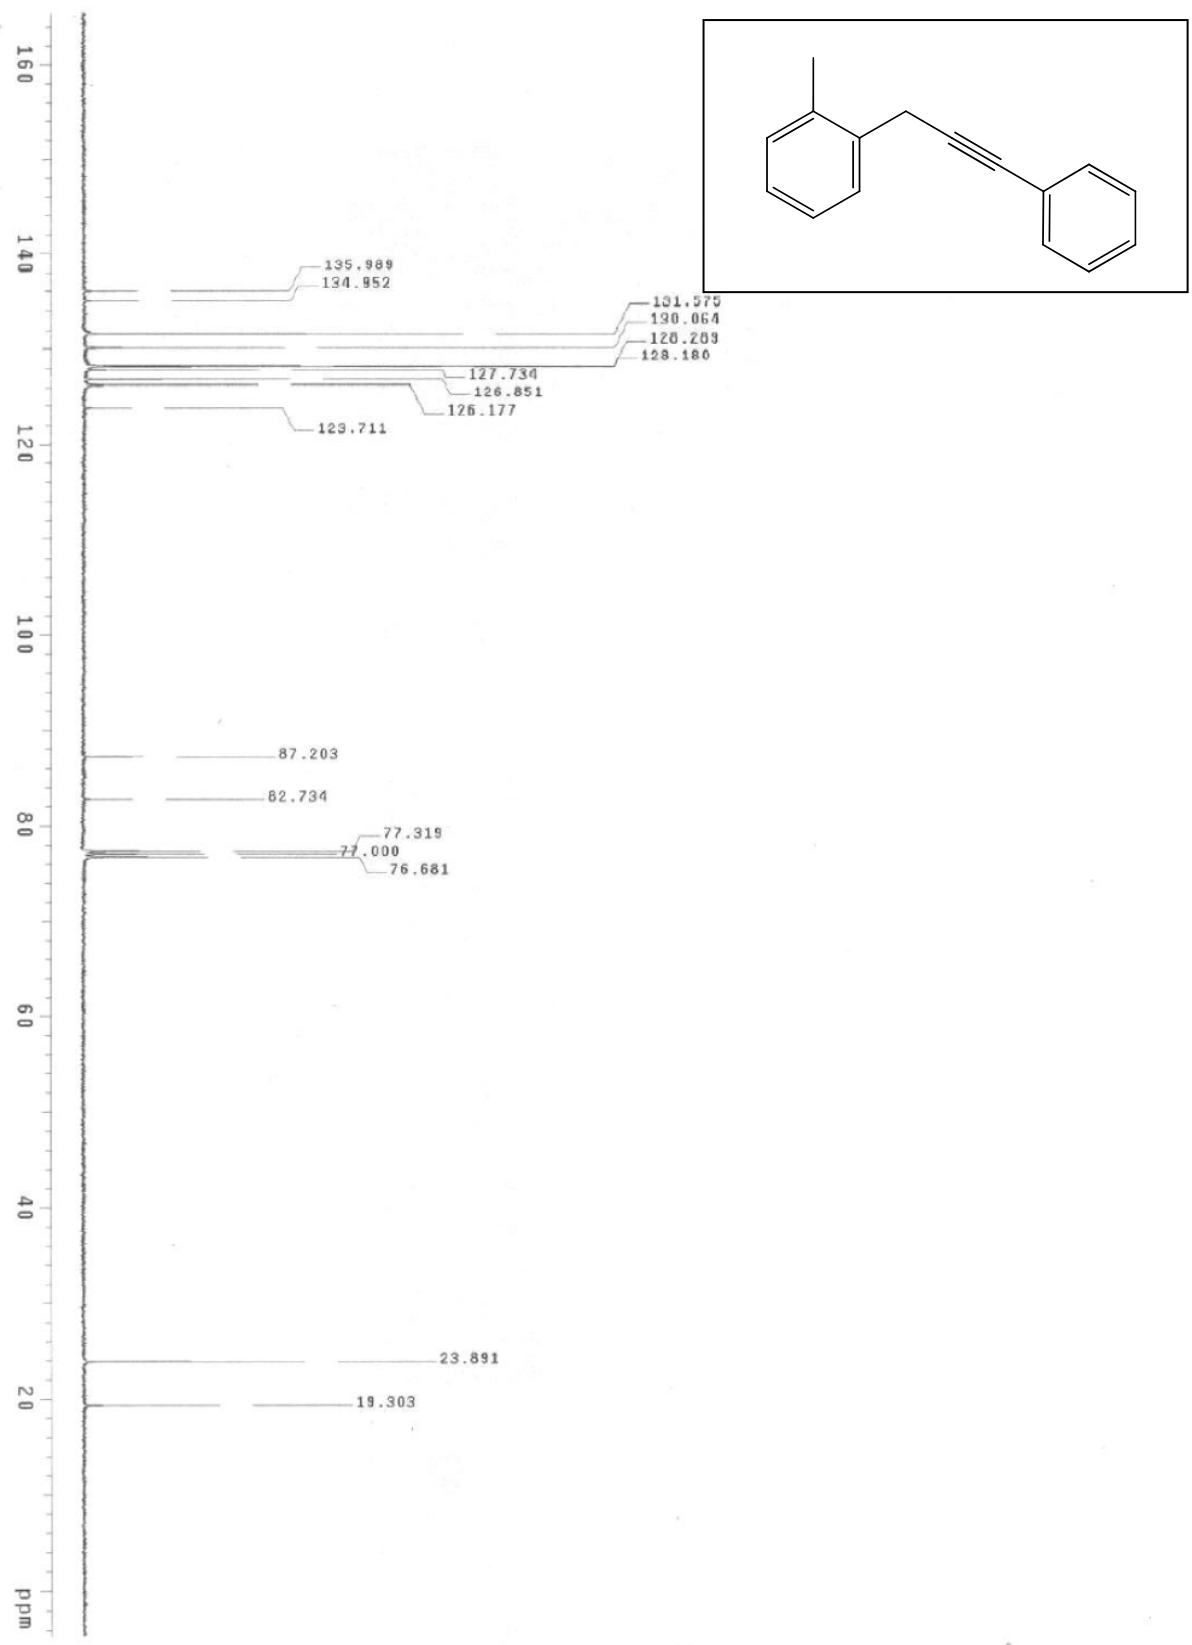

### 3. 1-methyl-3-(3-phenylprop-2-ynyl)benzene (2c)

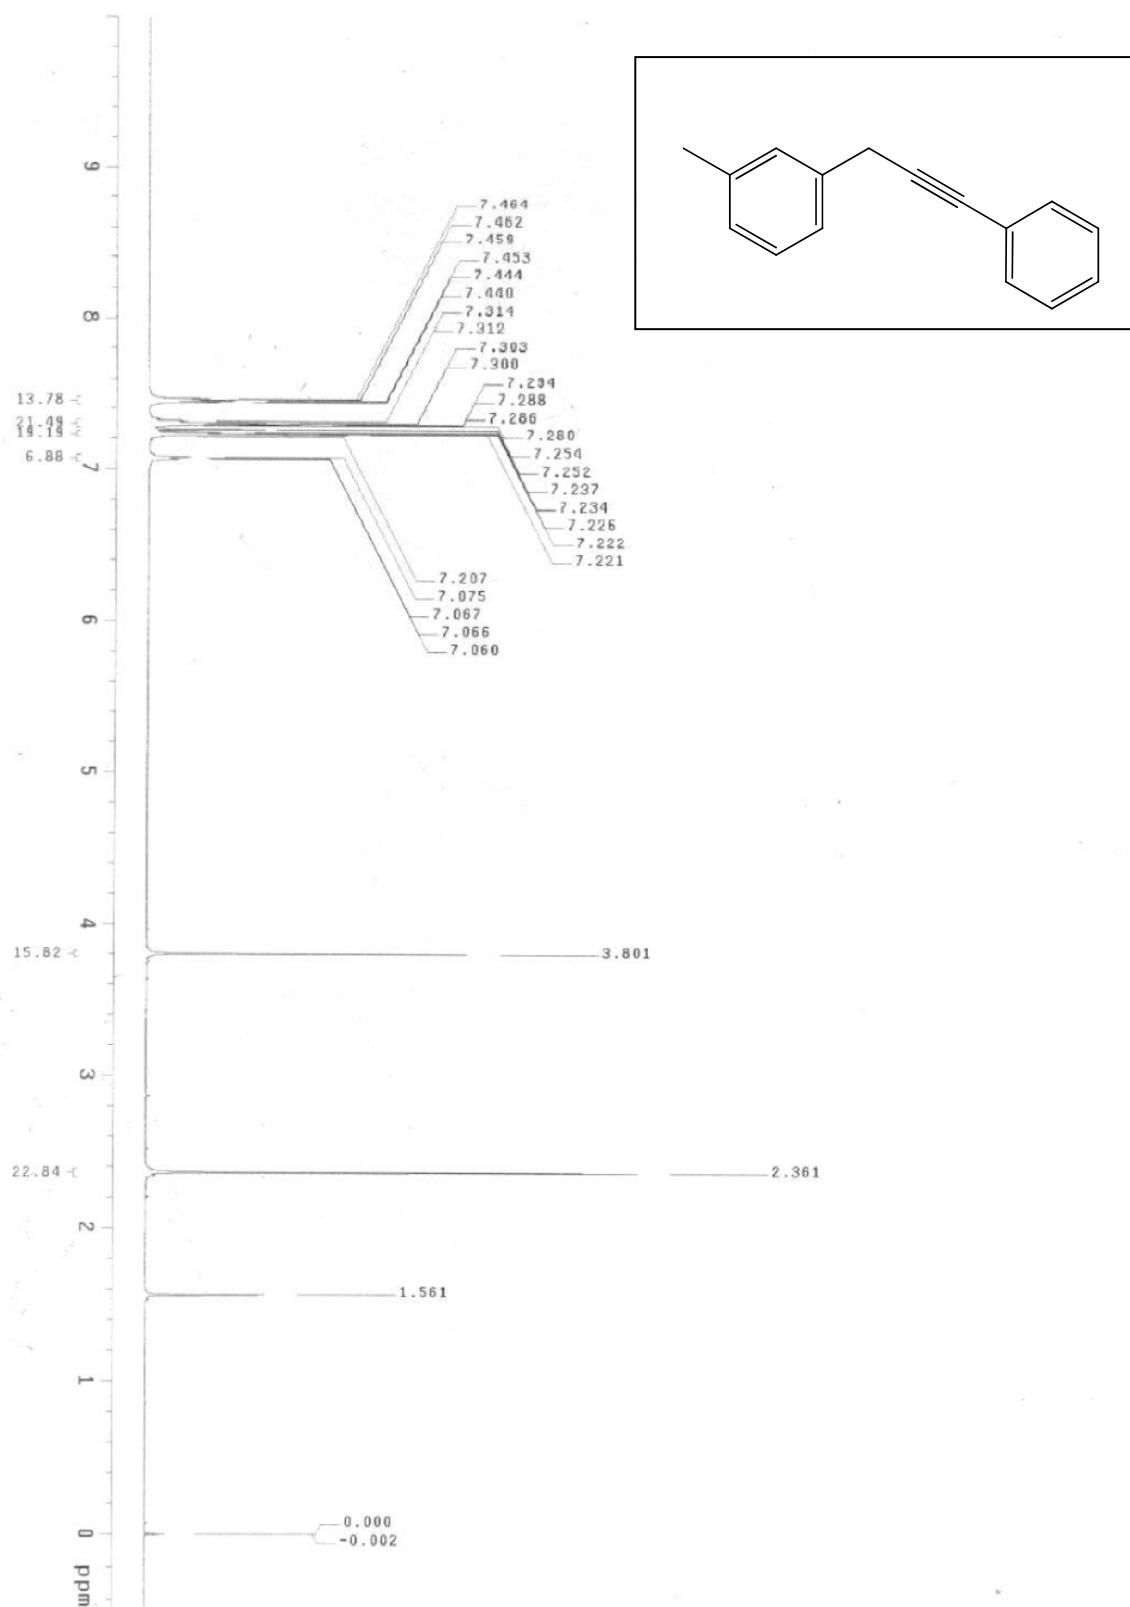

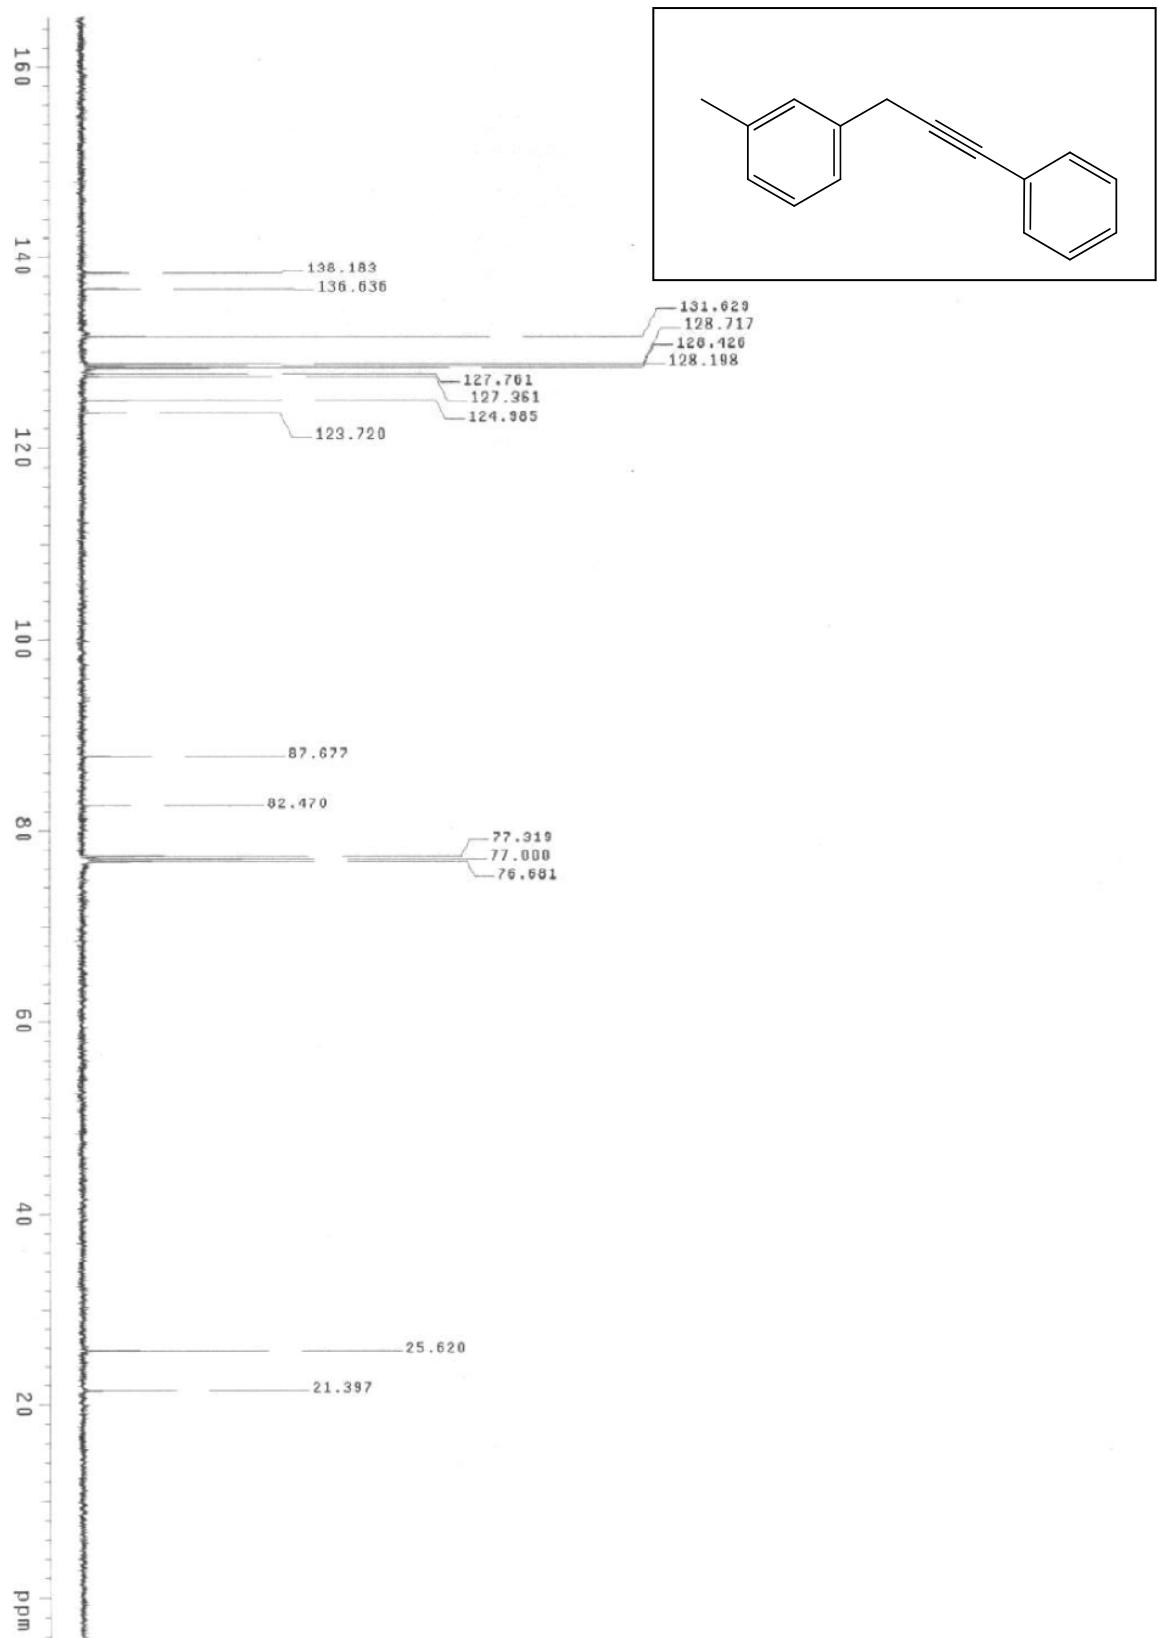

4. 1-methyl-4-(3-phenylprop-2-ynyl)benzene (**2d**)

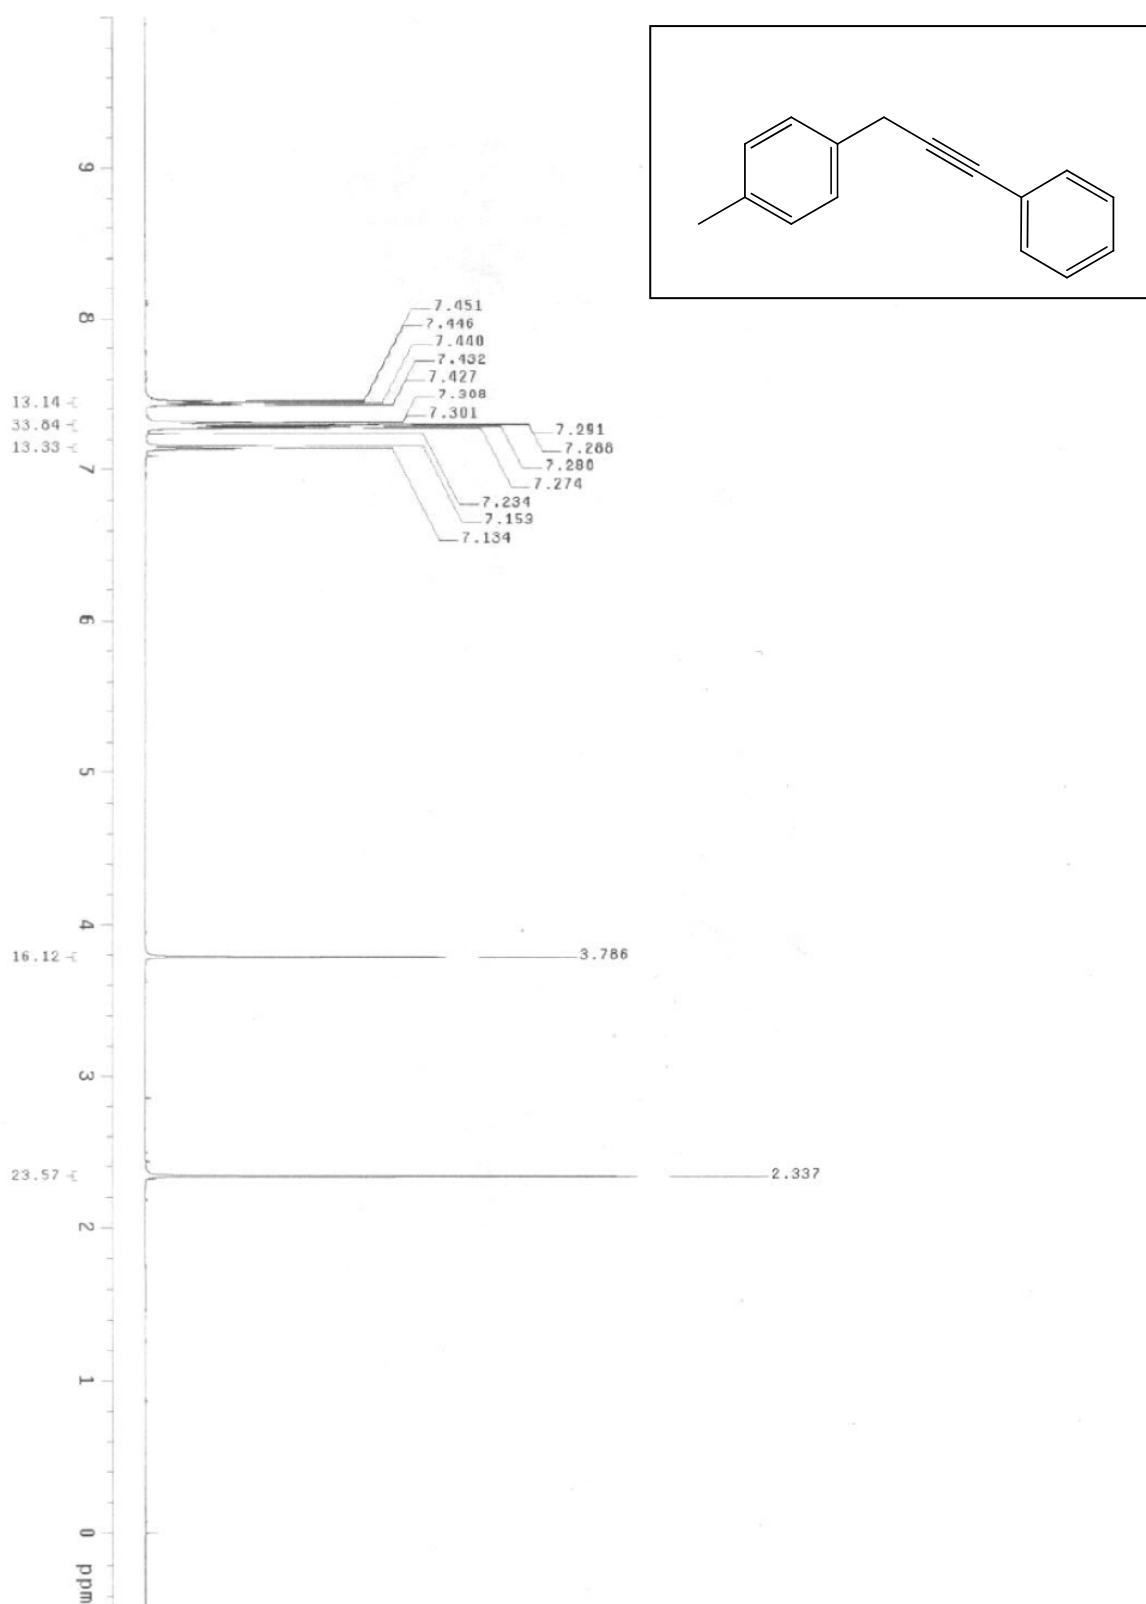

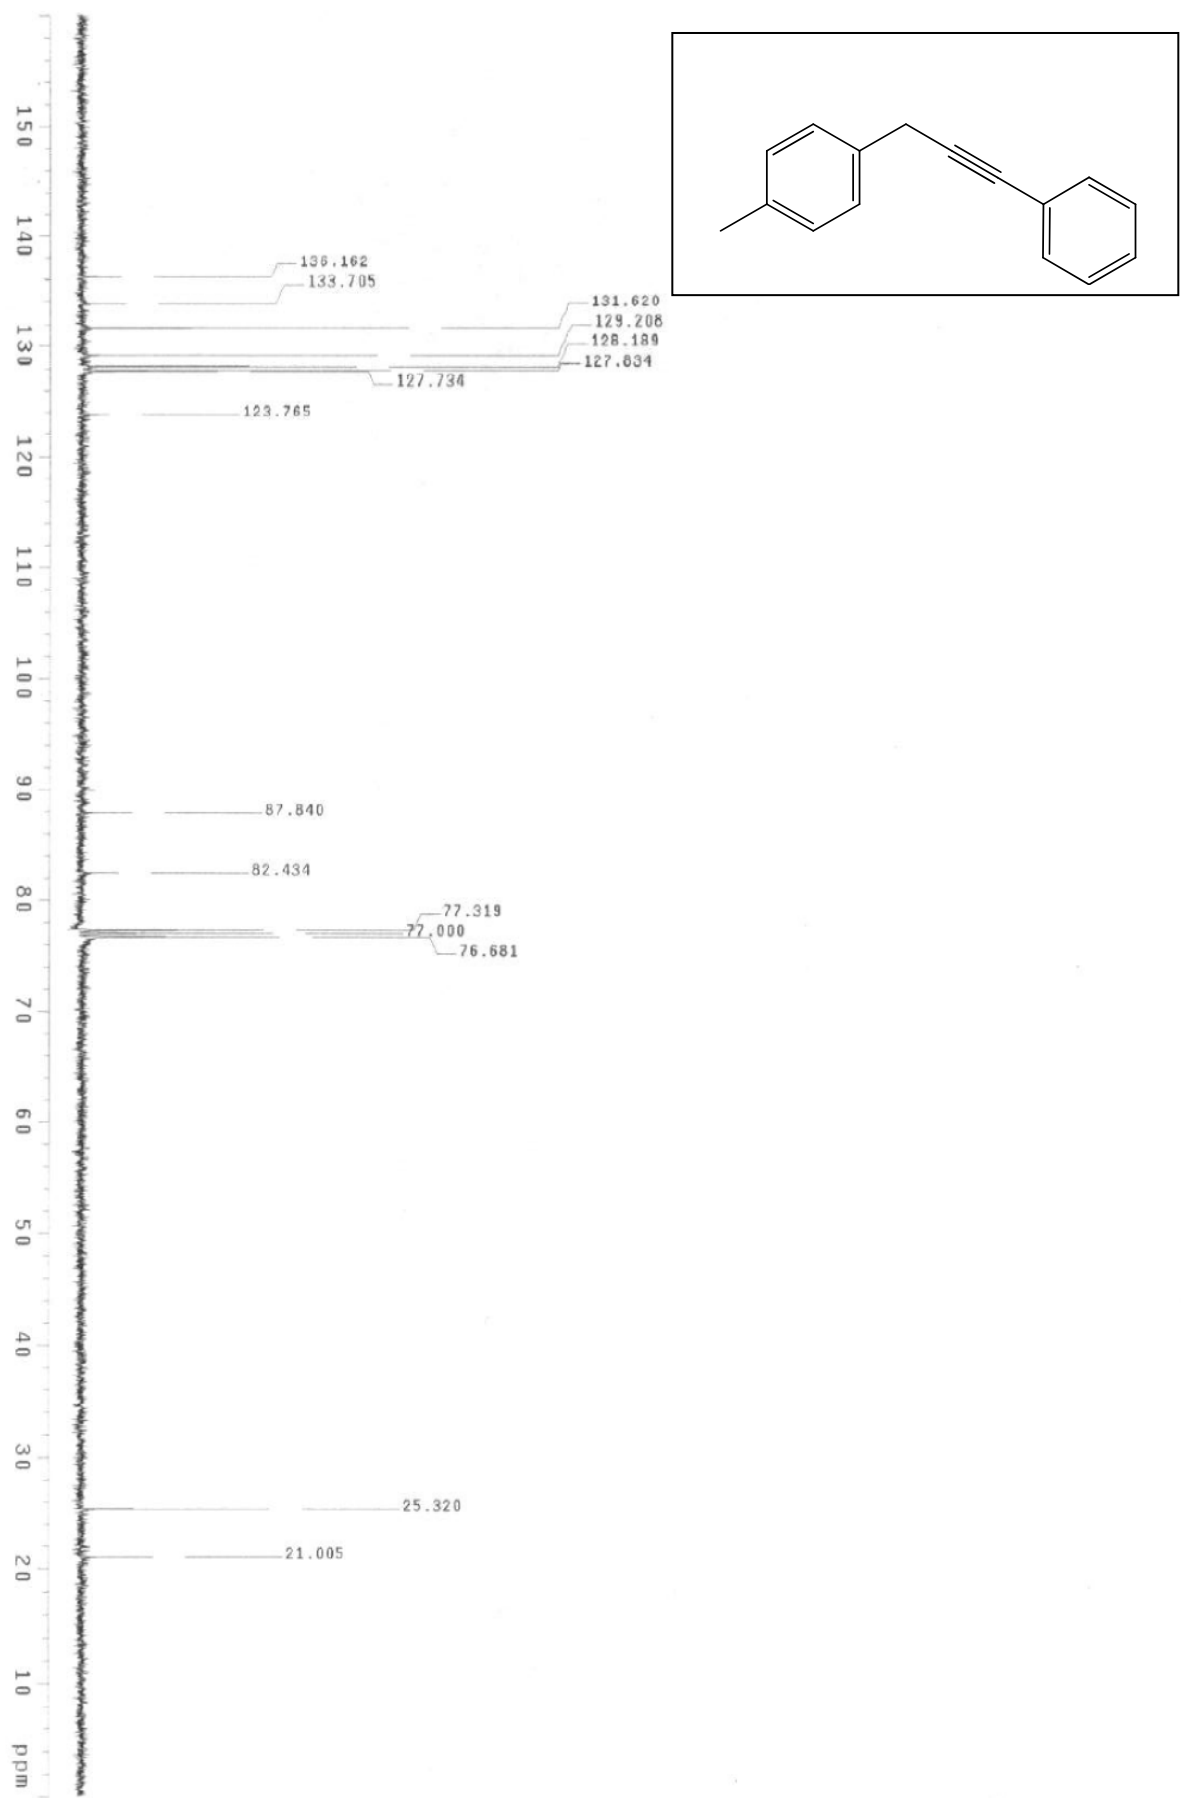

5. 1-methoxy-3-(3-phenylprop-2-ynyl)benzene (**2e**)

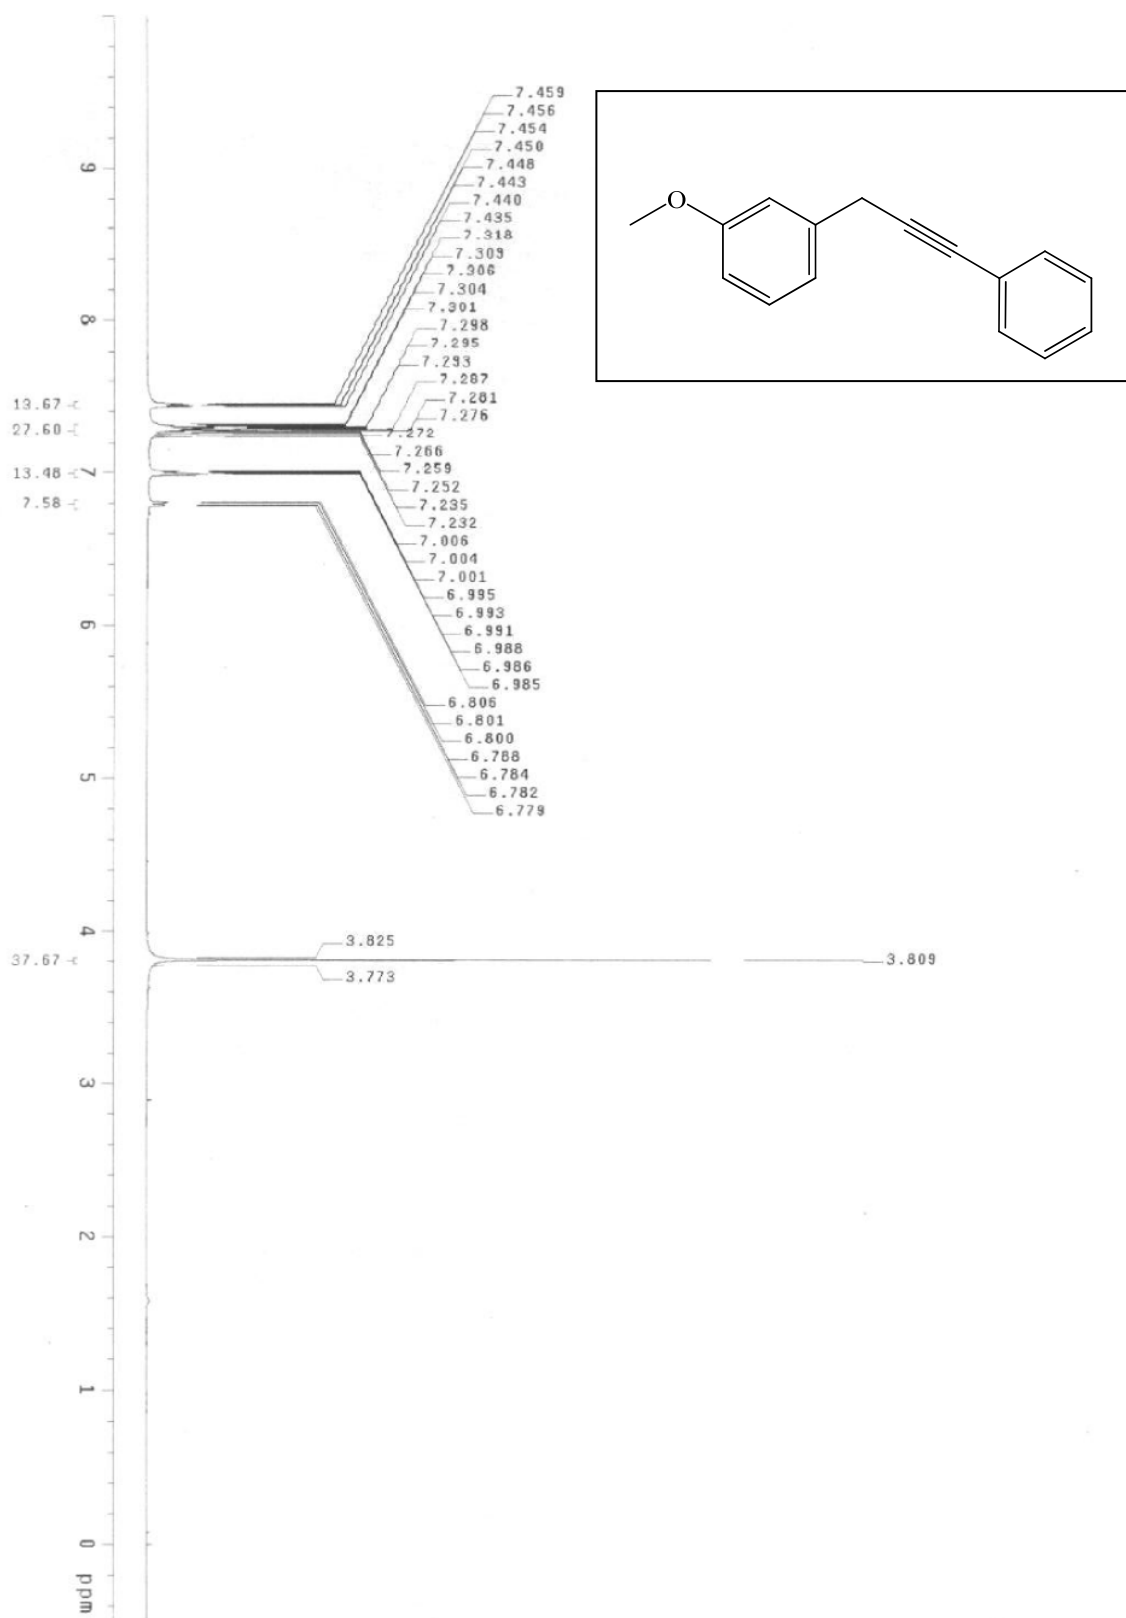

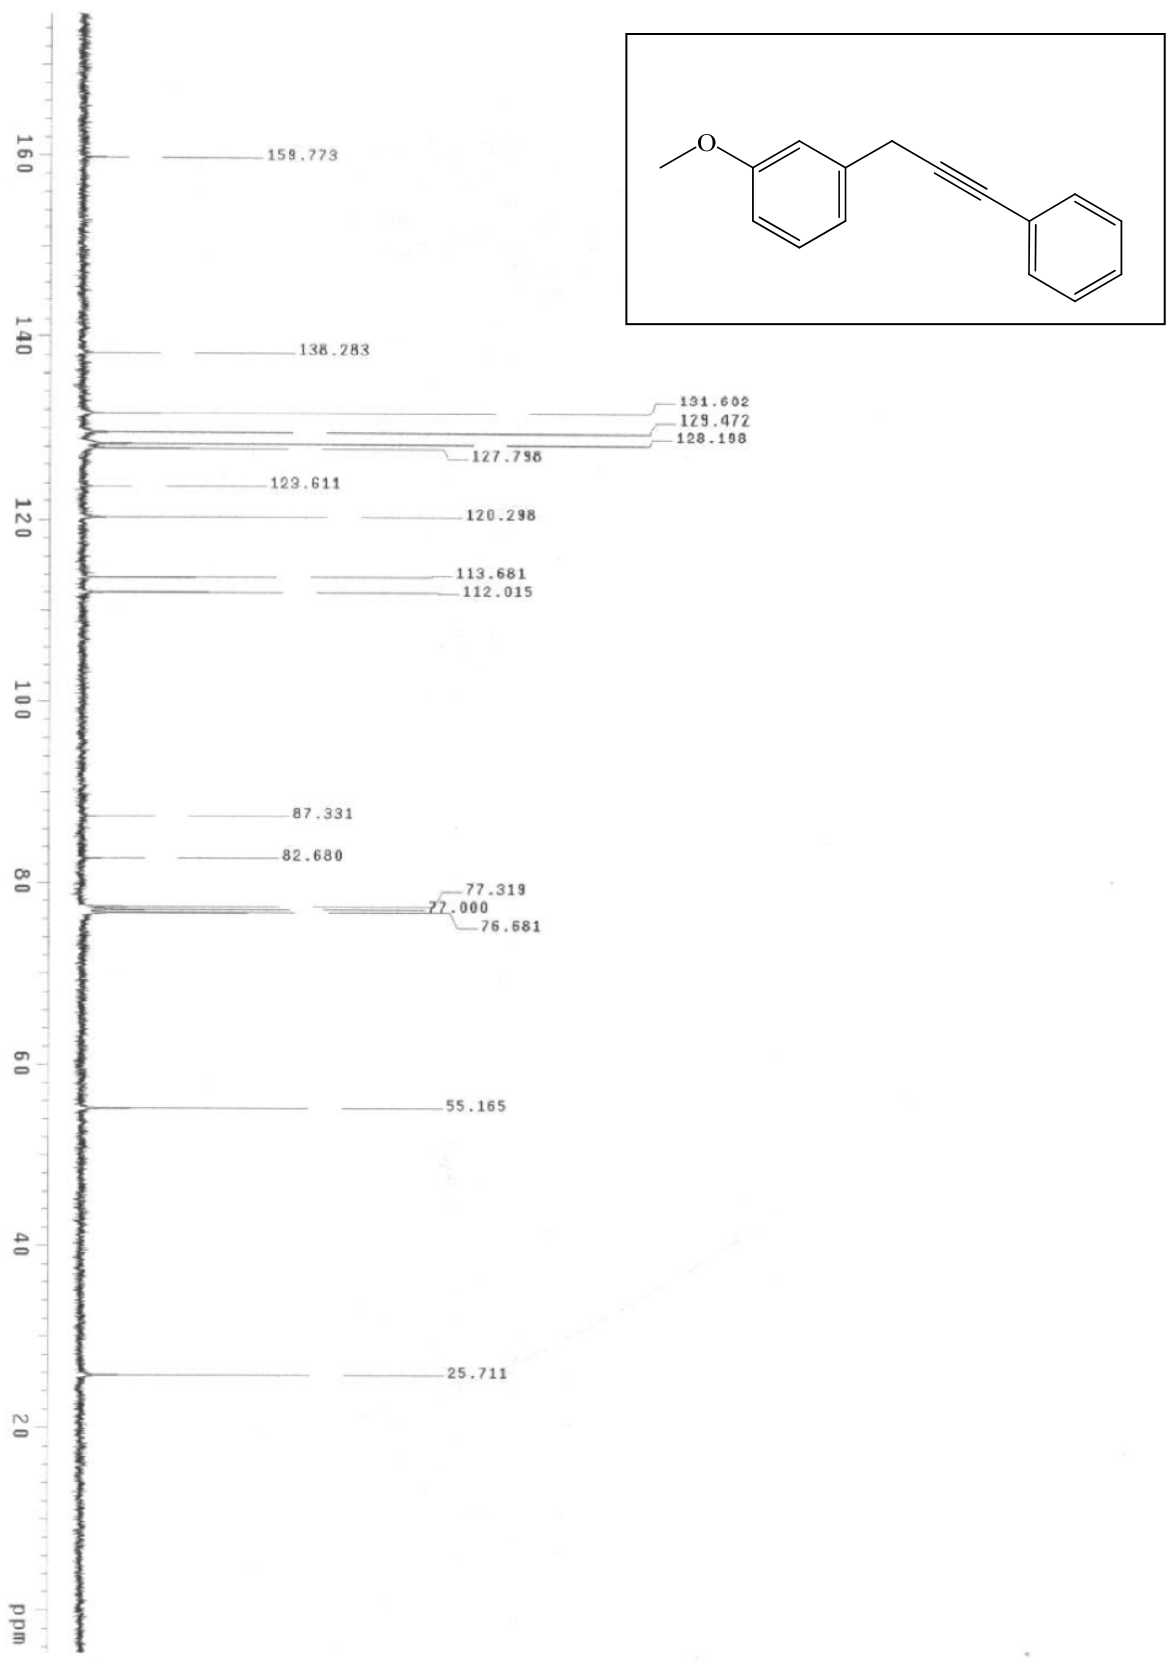

6. Methyl(4-(3-phenylprop-2-ynyl)phenyl)sulfane (**2f**)

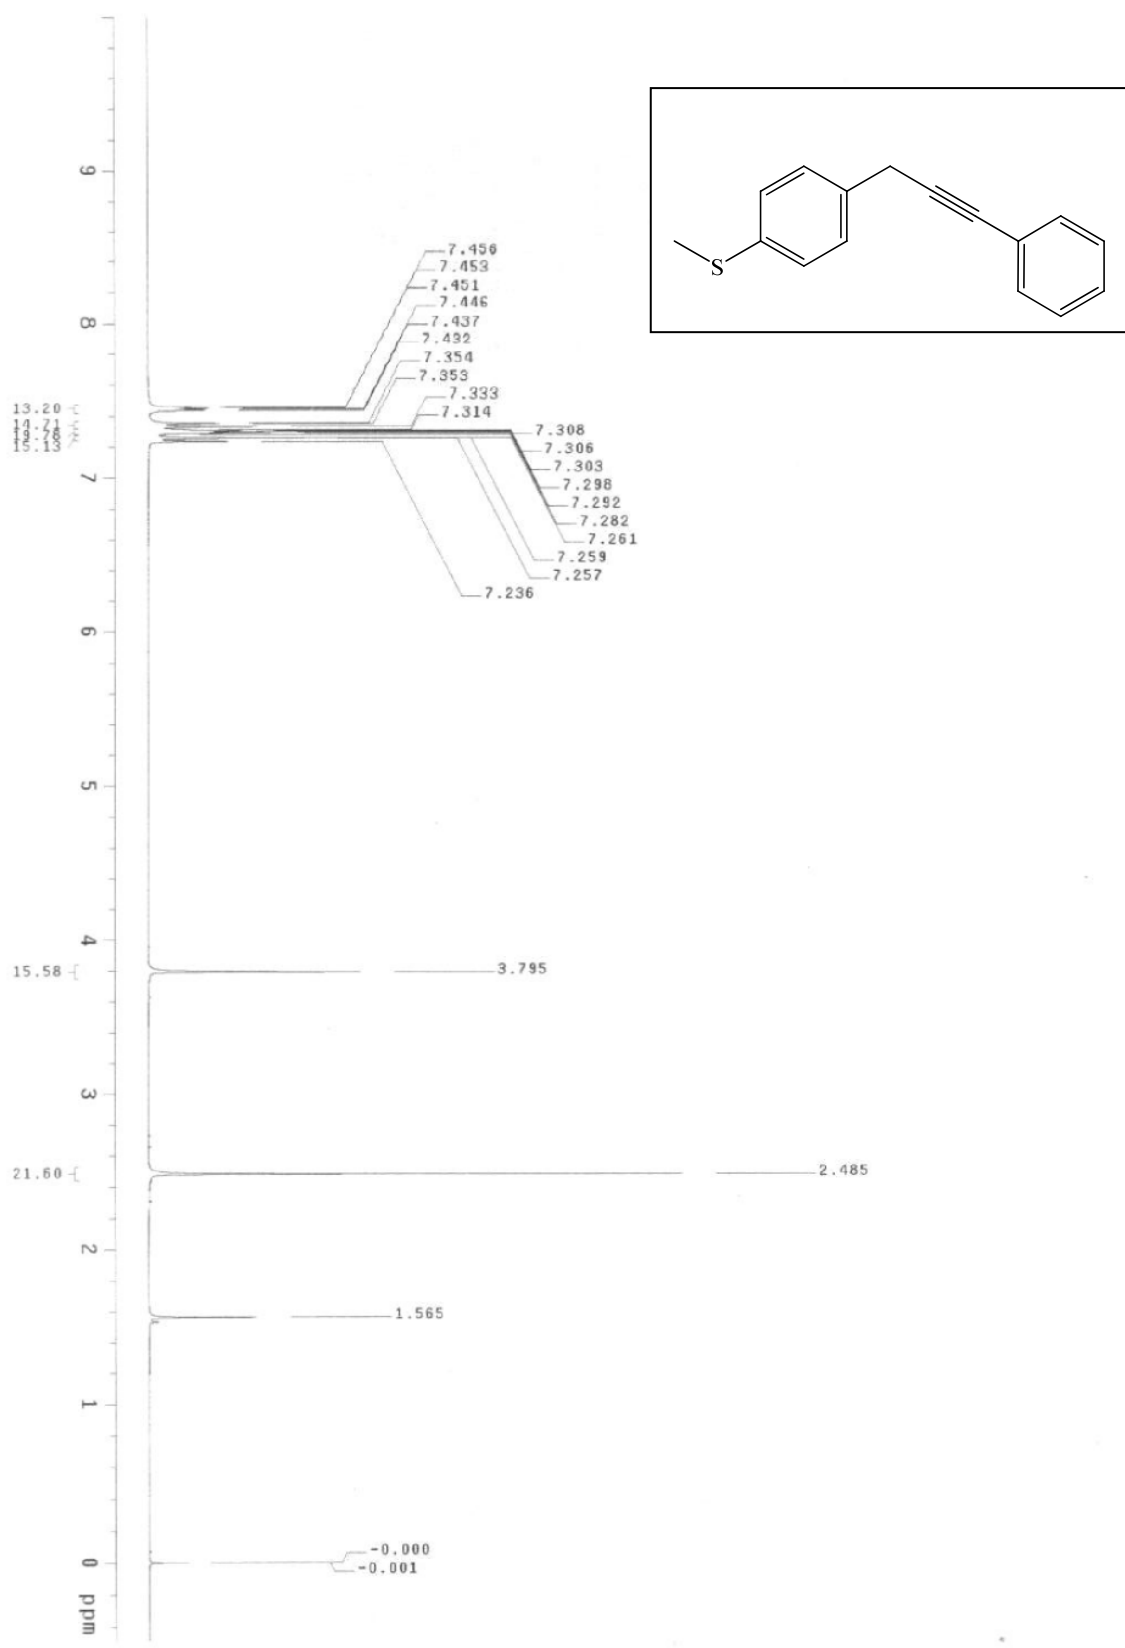

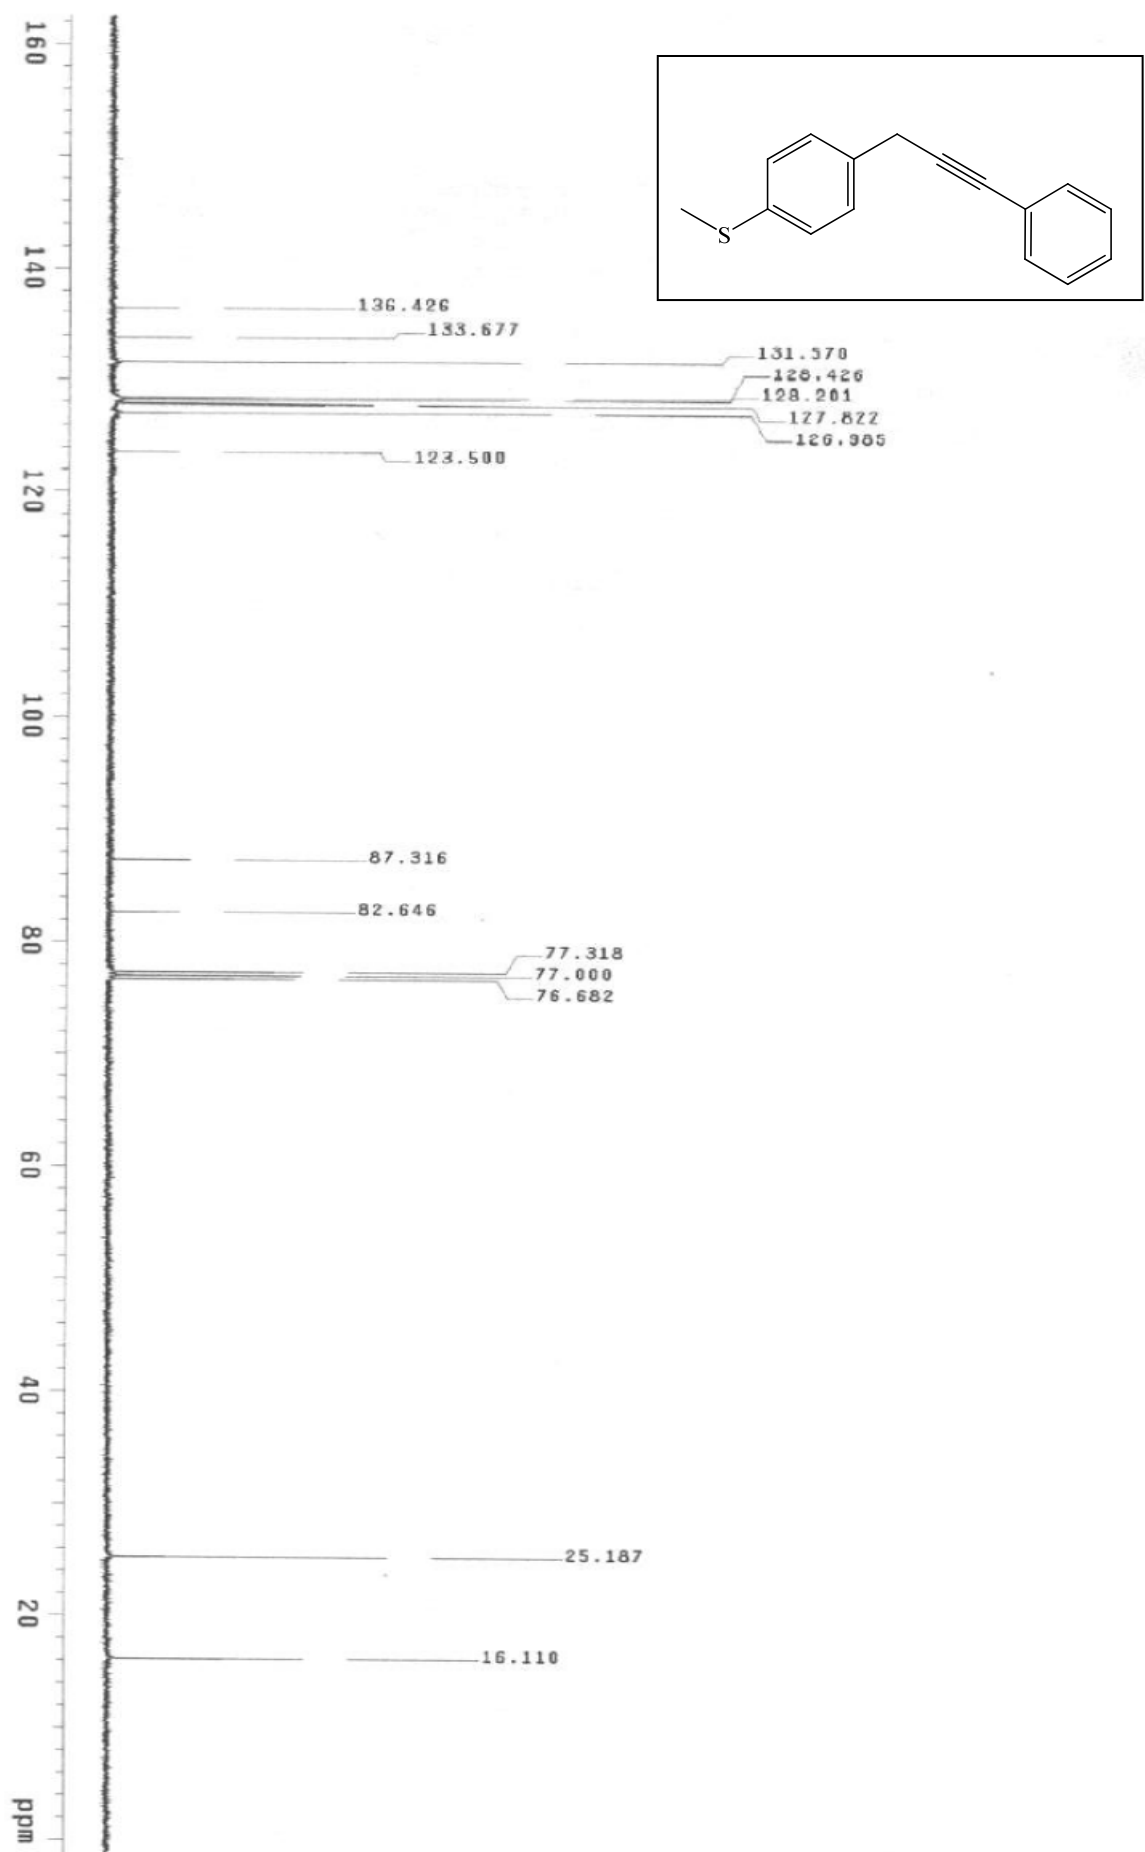

7. 1-tert-butyl-4-(3-phenylprop-2-ynyl)benzene (**2g**)

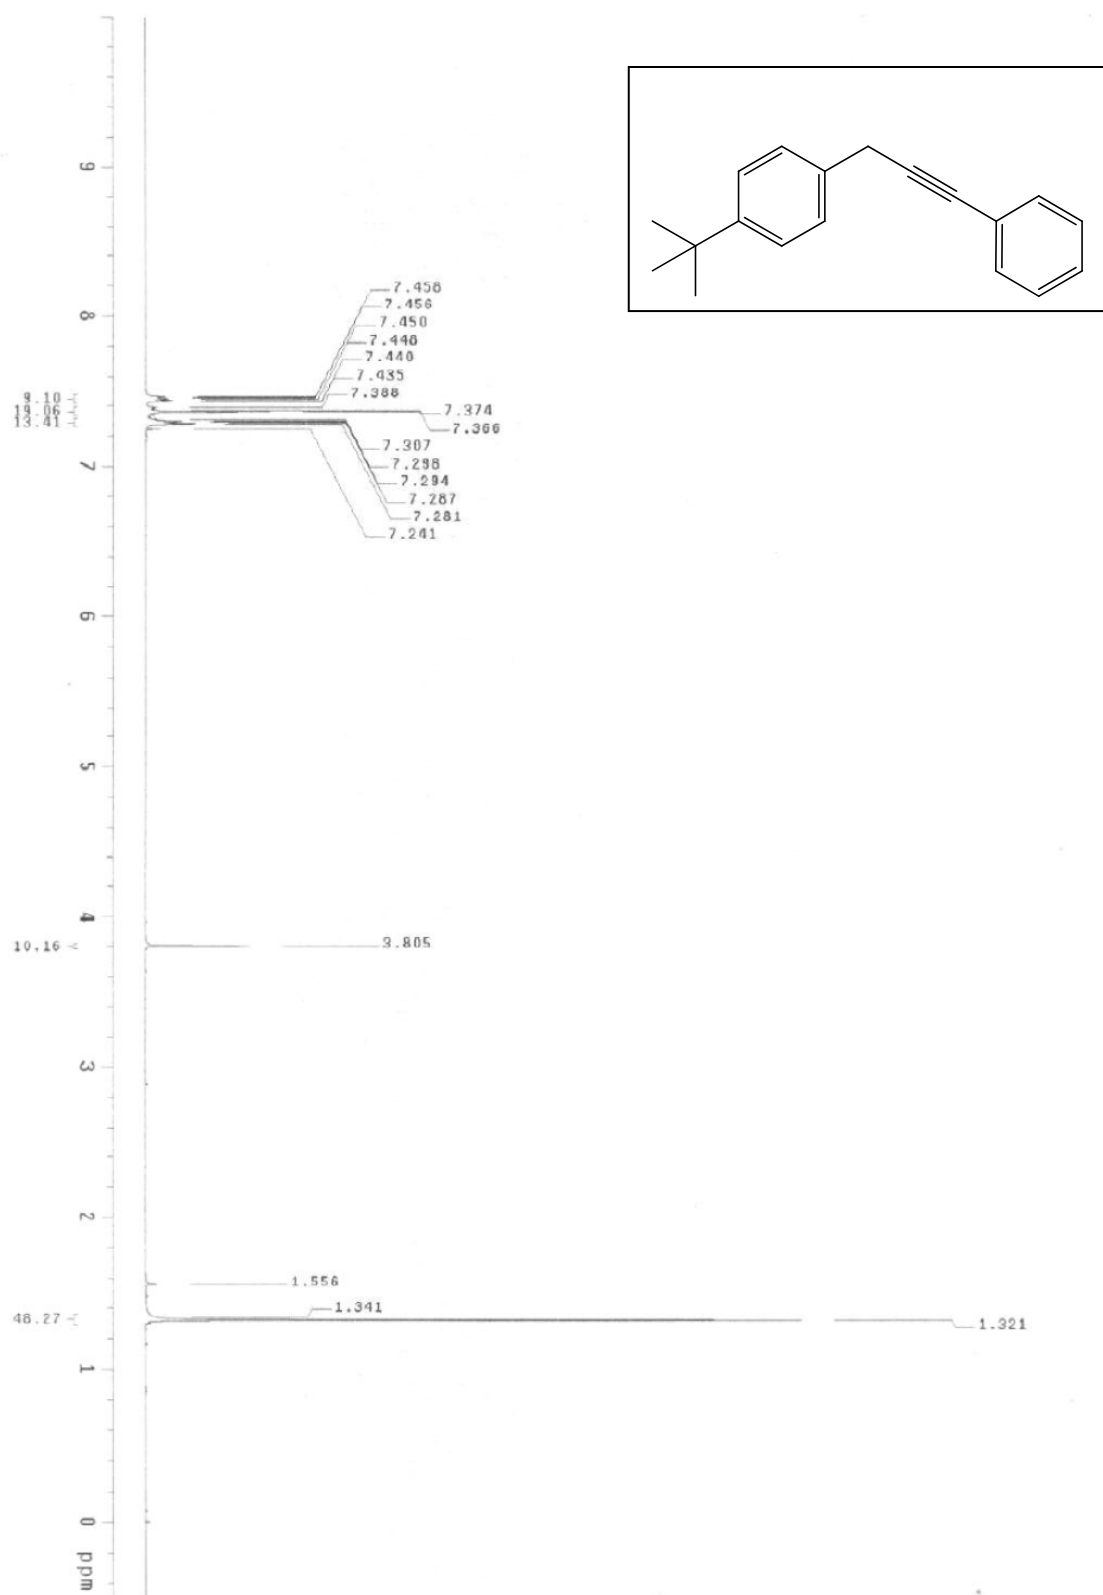

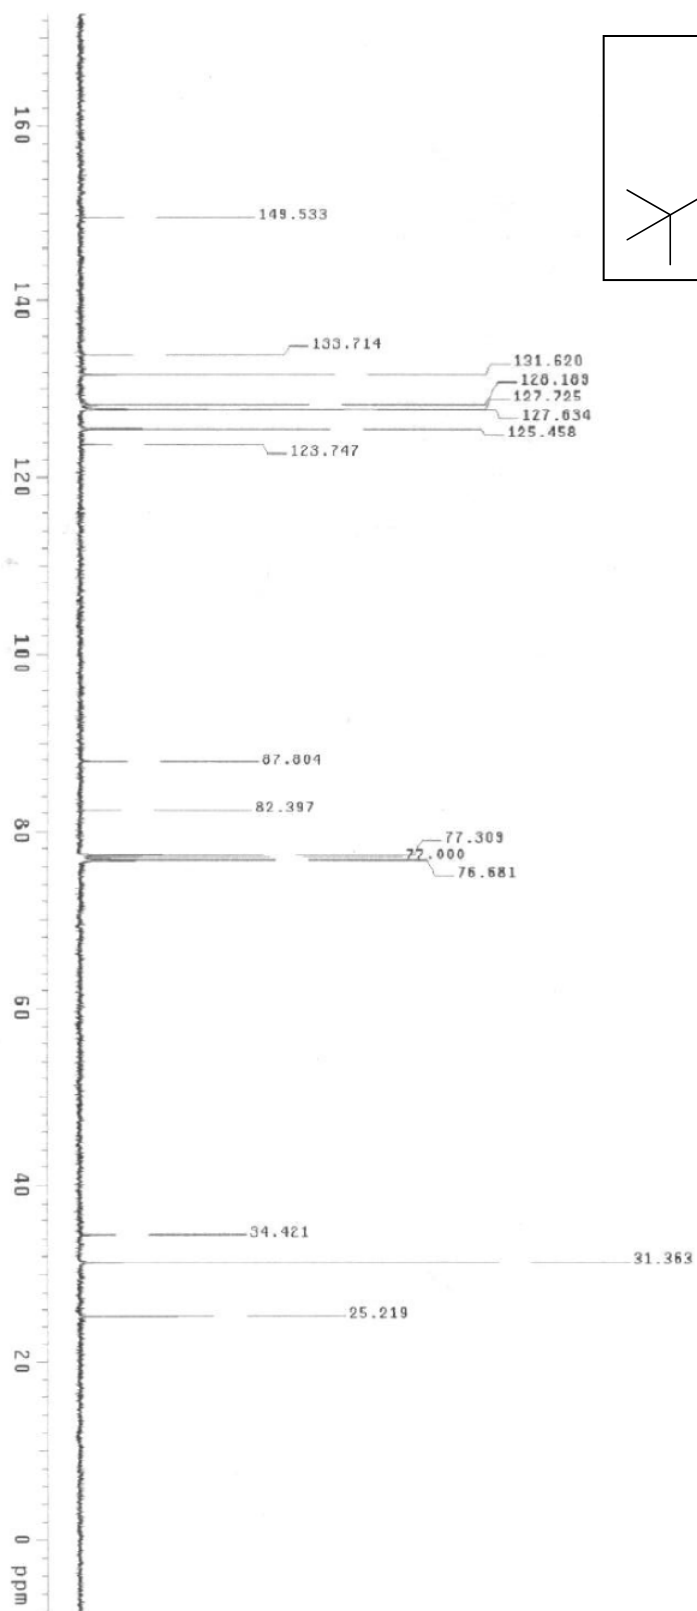

8. 2-(3-phenylprop-2-ynyl)biphenyl (**2h**)

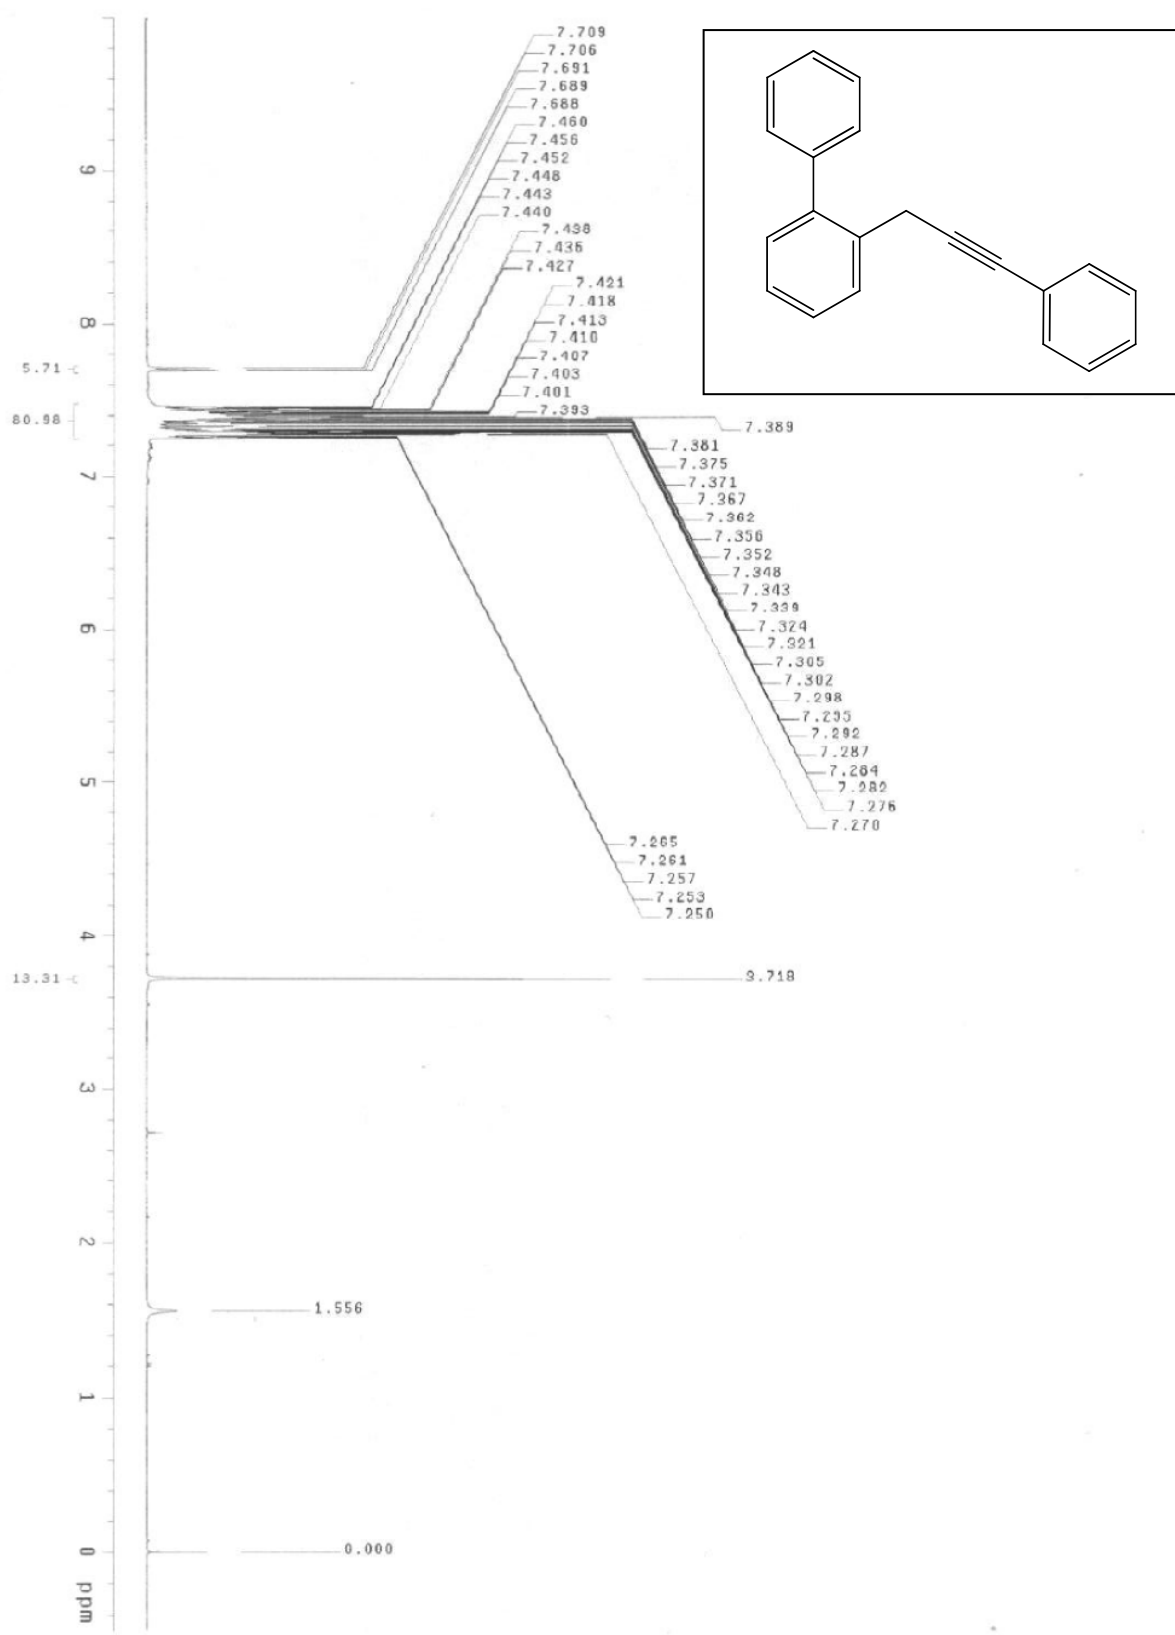

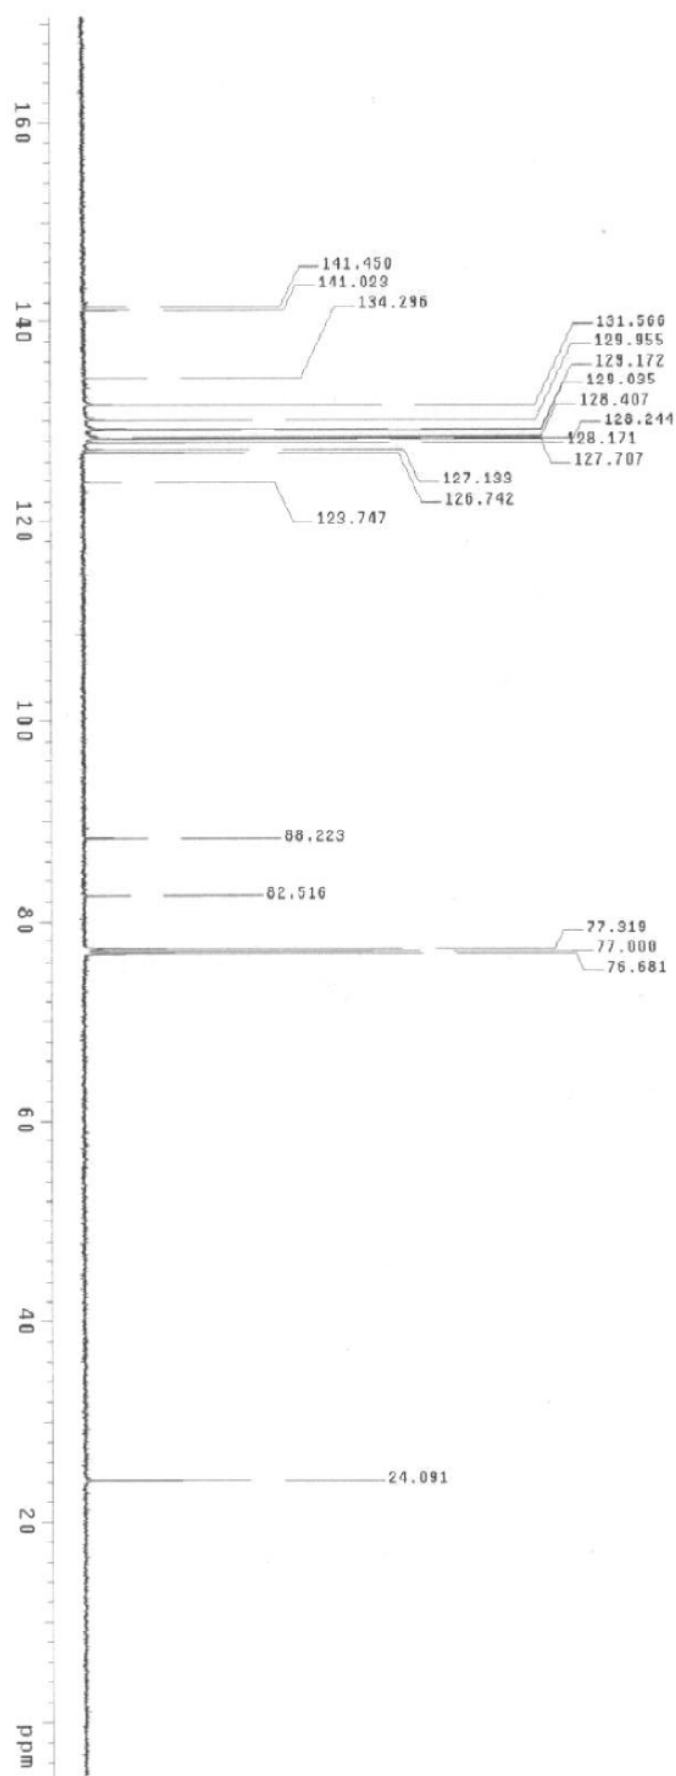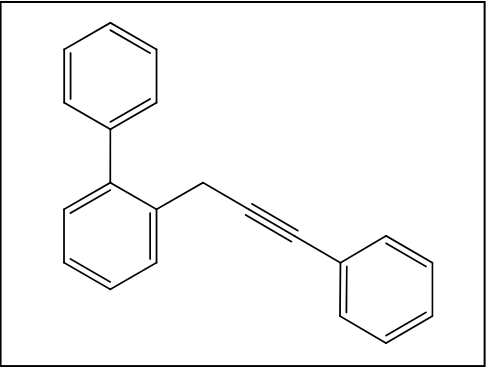

### 9. 3-(3-phenylprop-2-ynyl)biphenyl (**2i**)

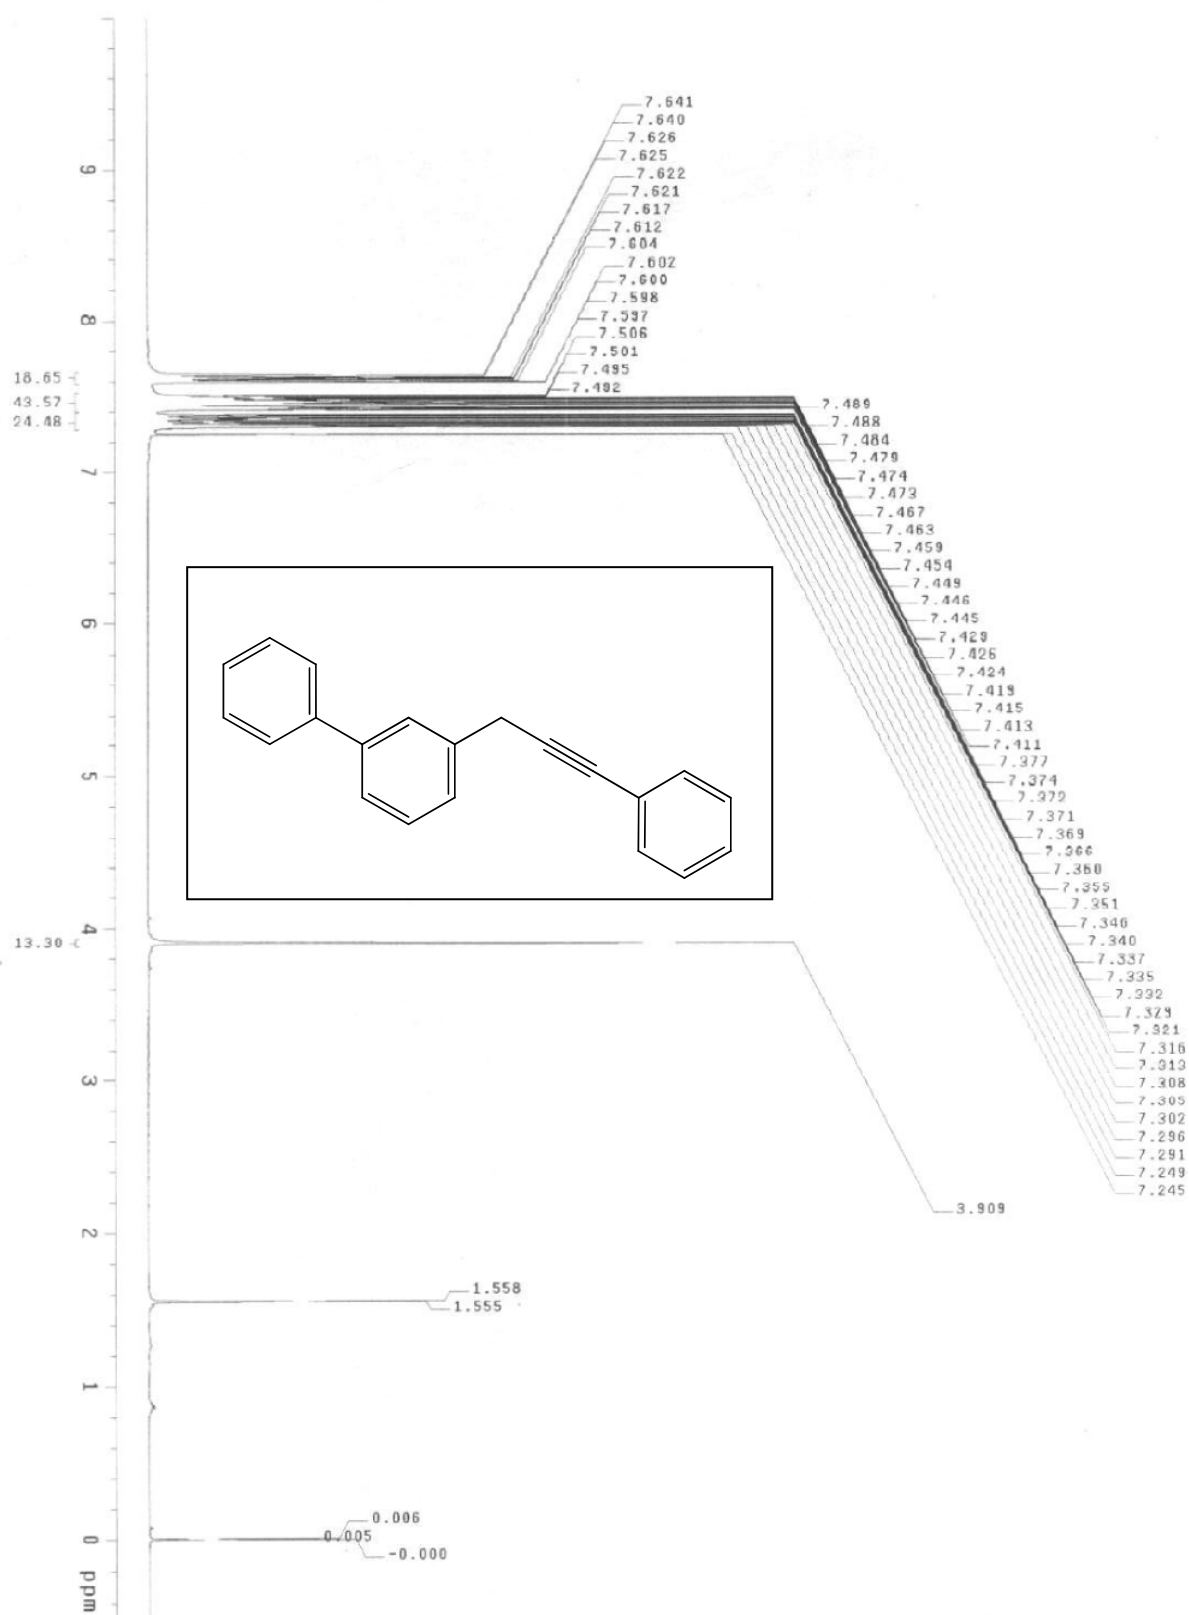

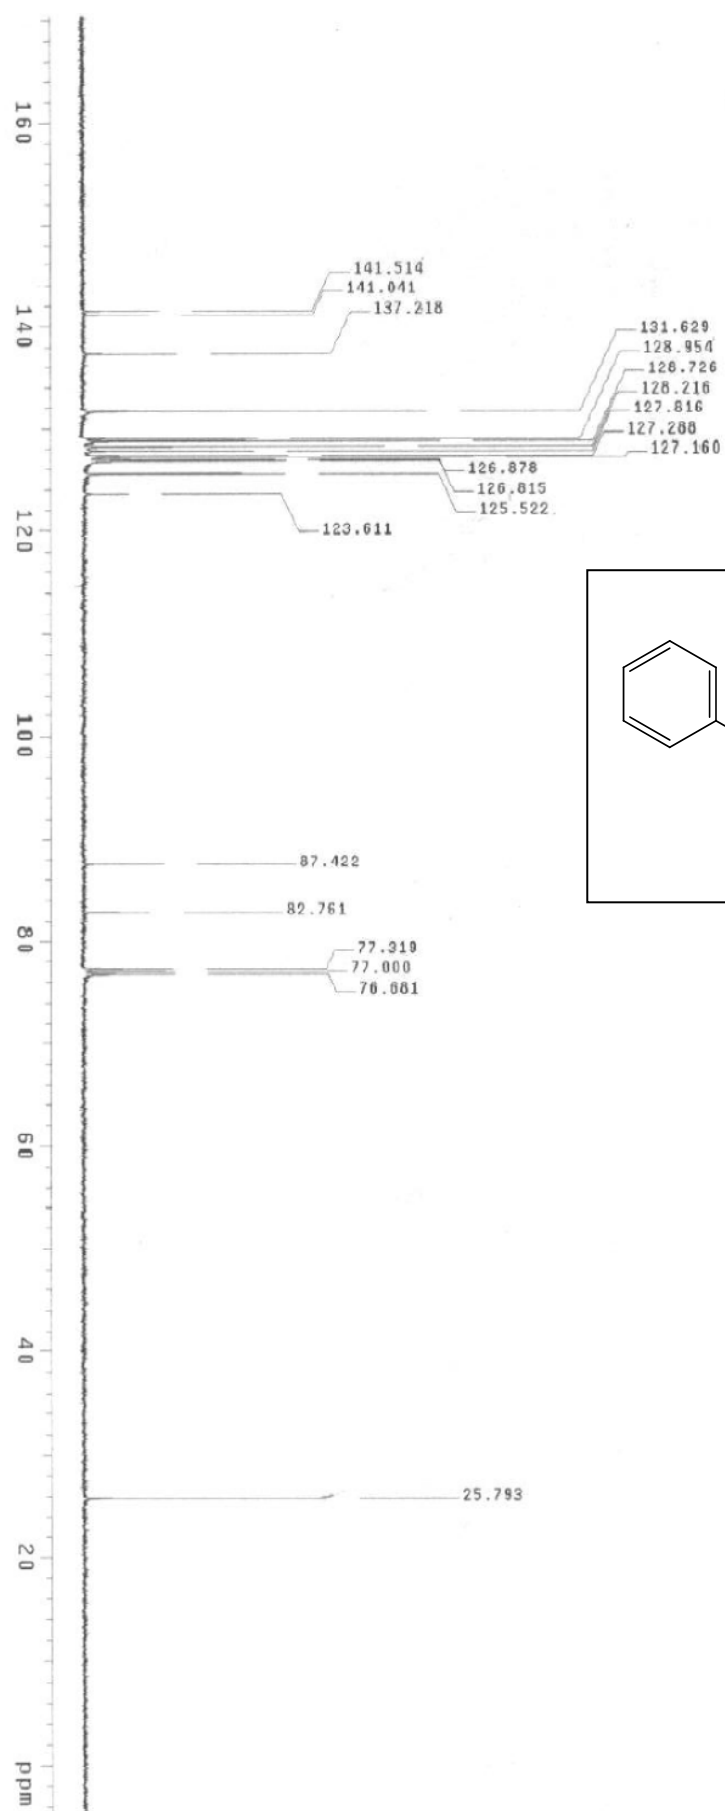

10. 1,3-dimethoxy-5-(3-phenylprop-2-ynyl)benzene (**2j**)

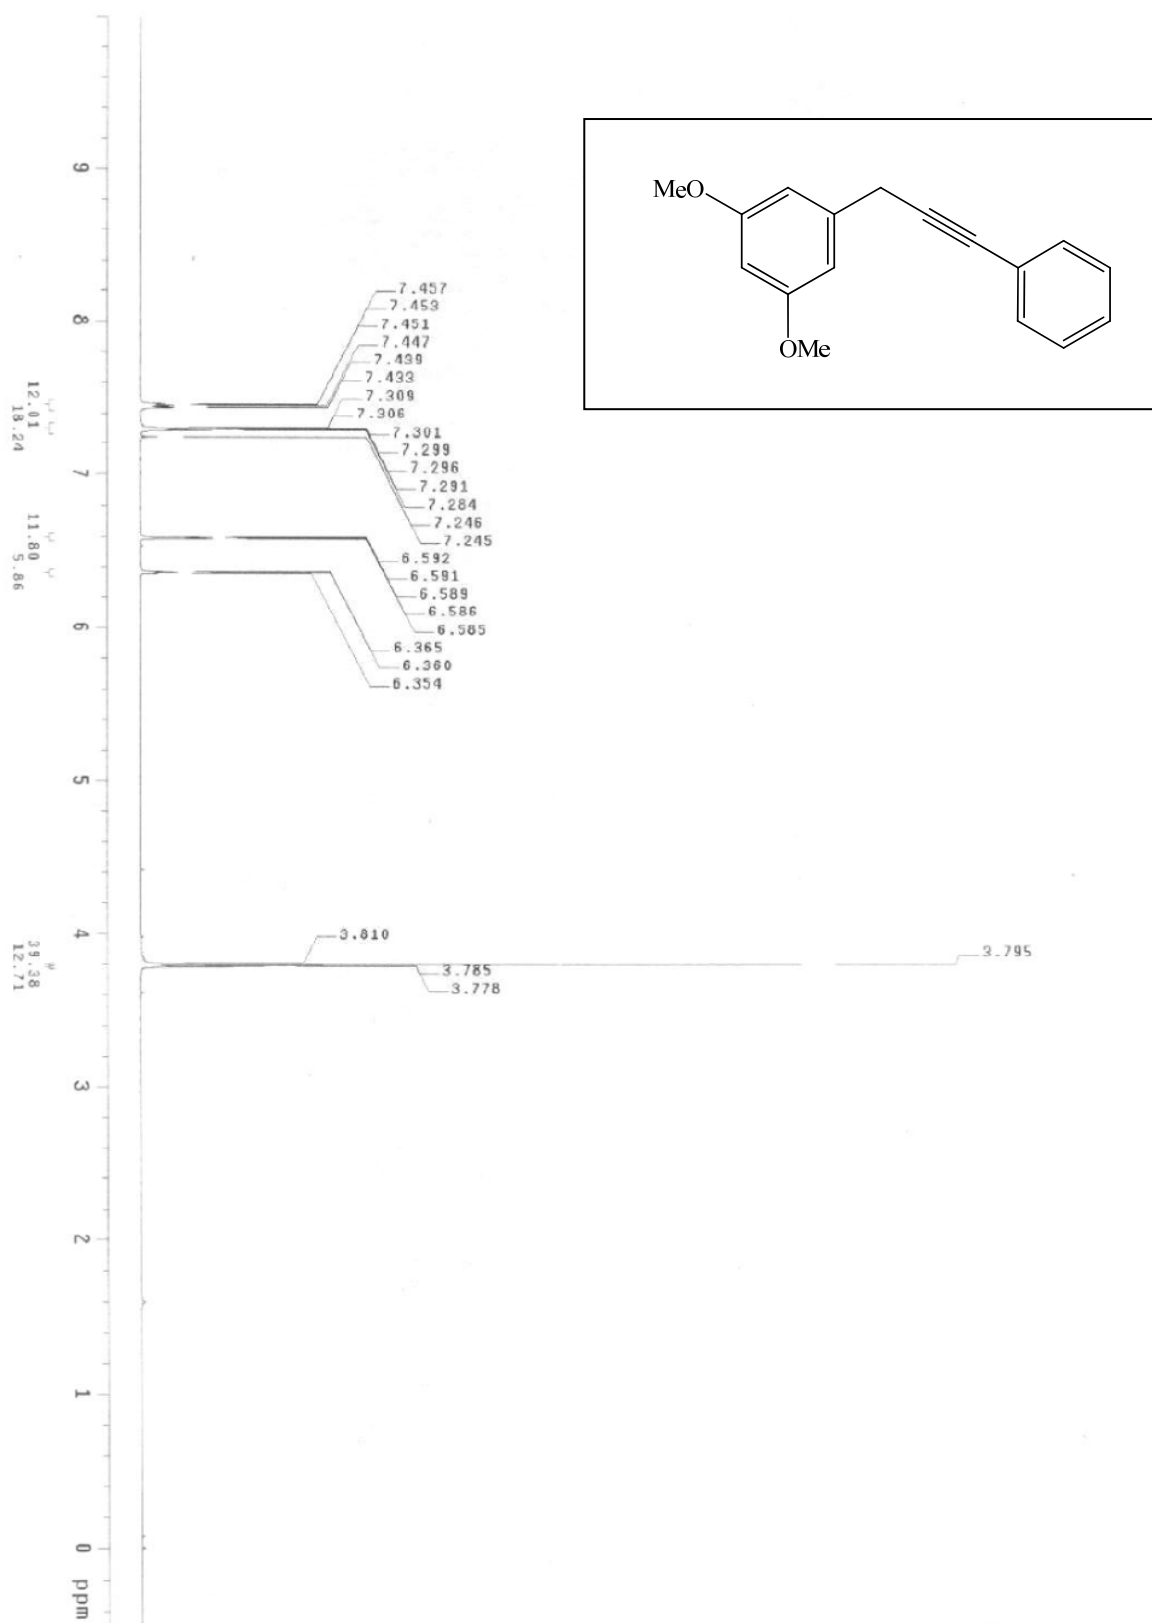

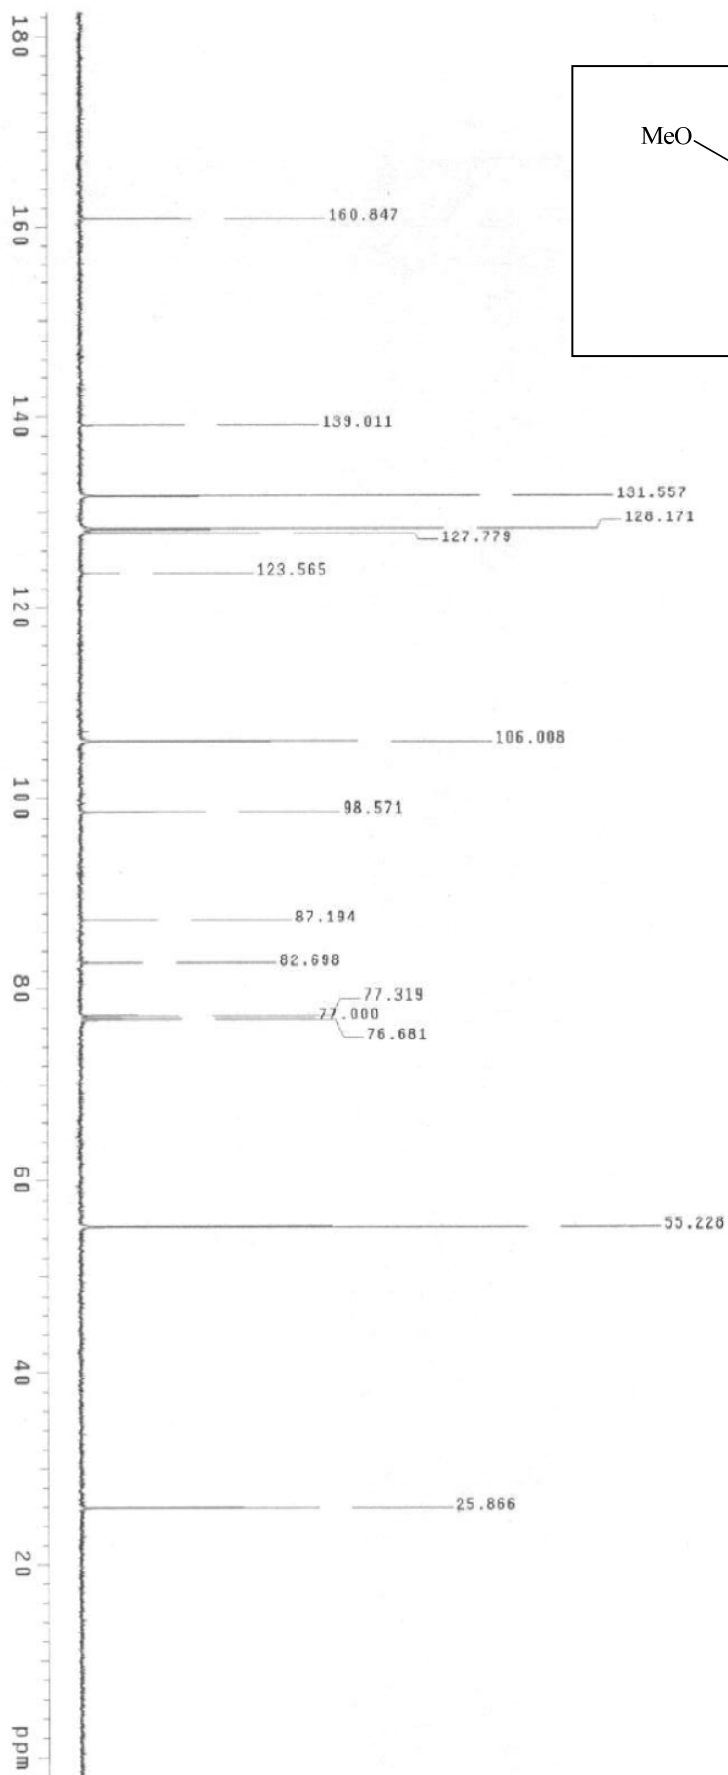

11. 1-chloro-4-(3-phenylprop-2-ynyl)benzene (**2k**)

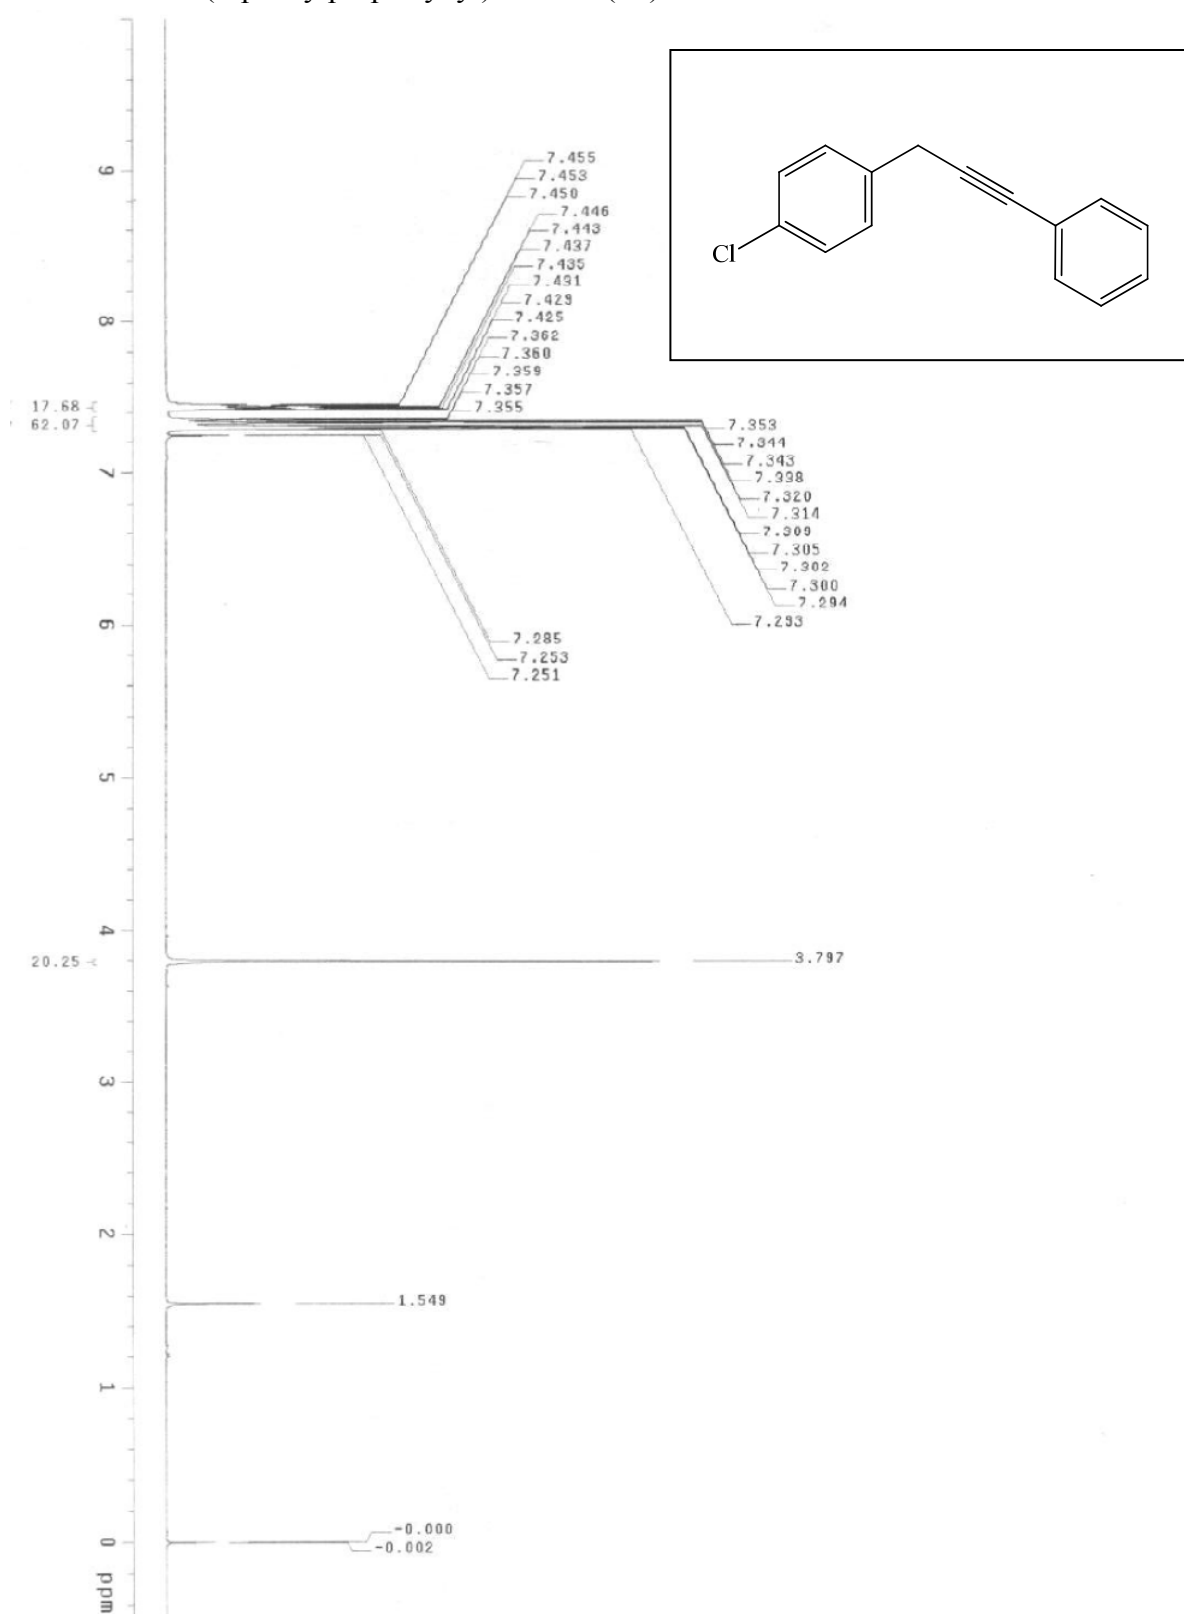

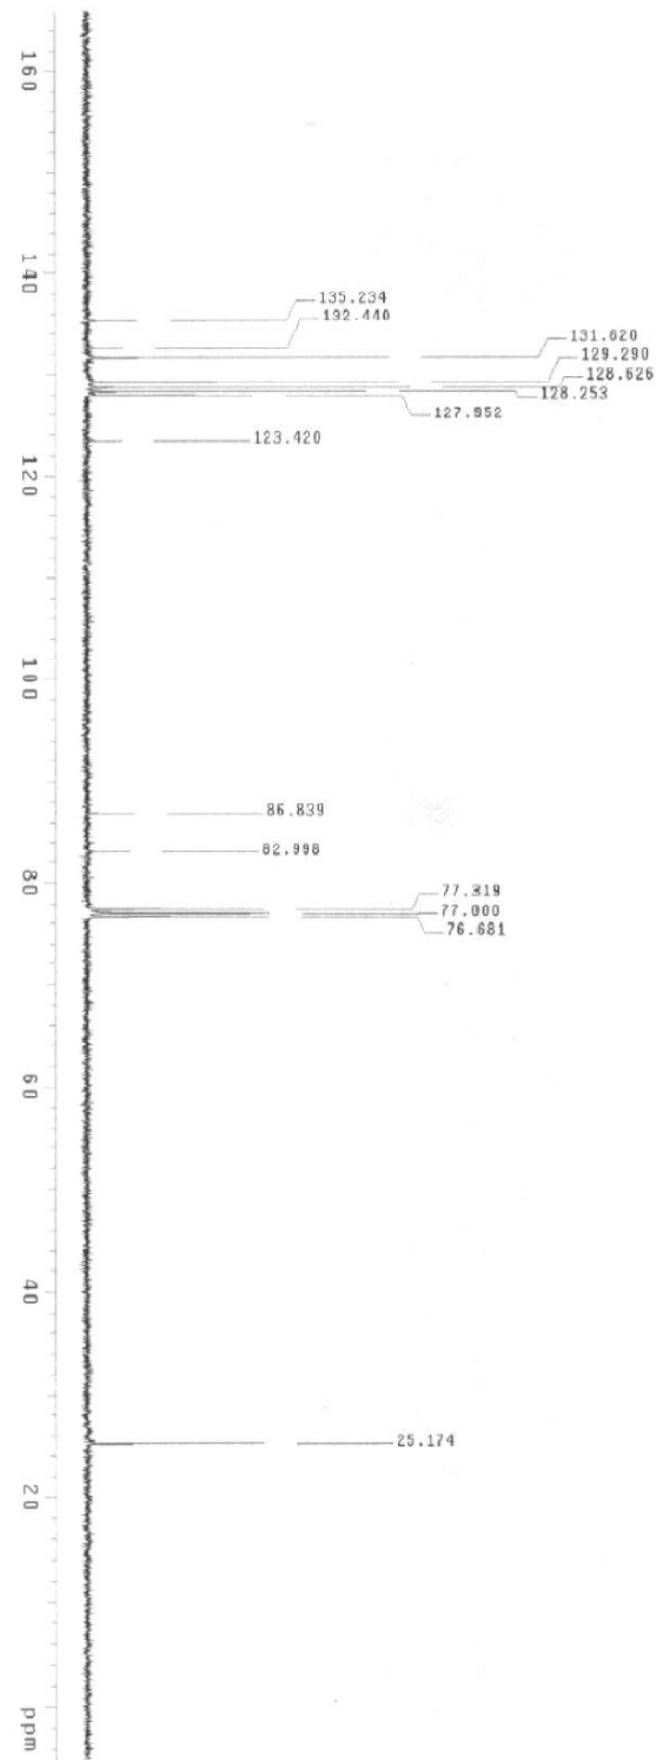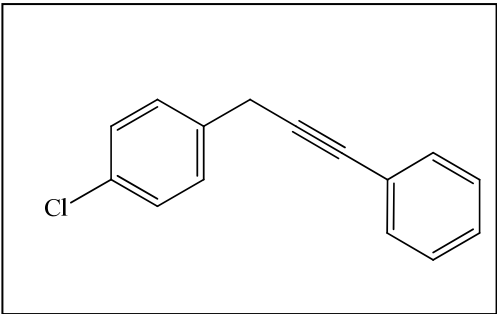

12. 4-(3-phenylprop-2-ynyl)benzonitrile (**21**)

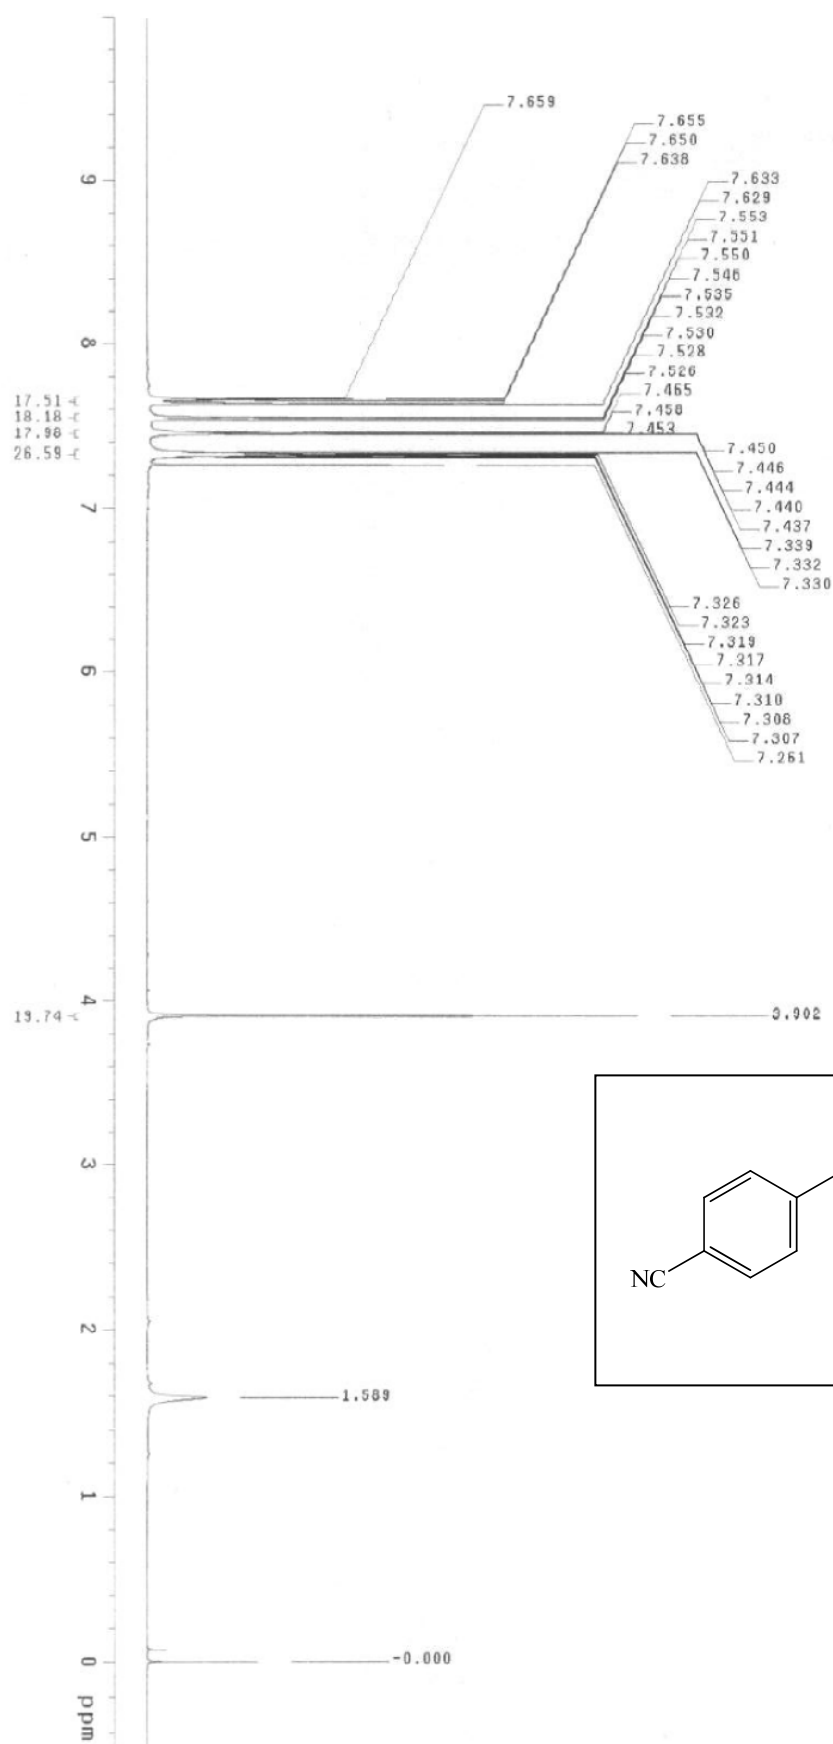

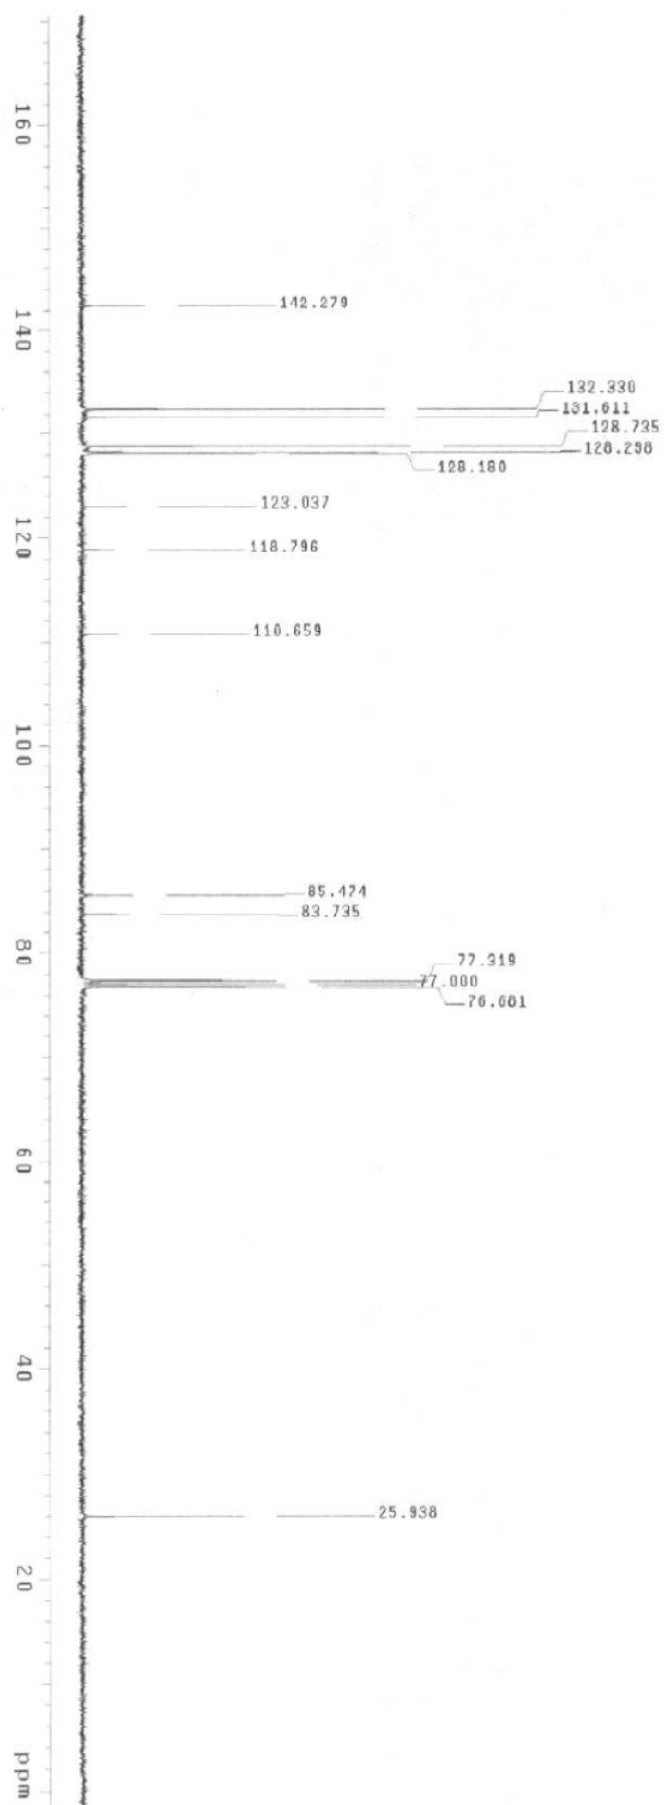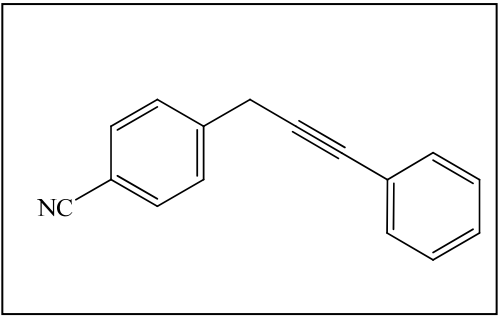

13. 1-(3-phenylprop-2-ynyl)-3,5-bis(trifluoromethyl)benzene (**2m**)

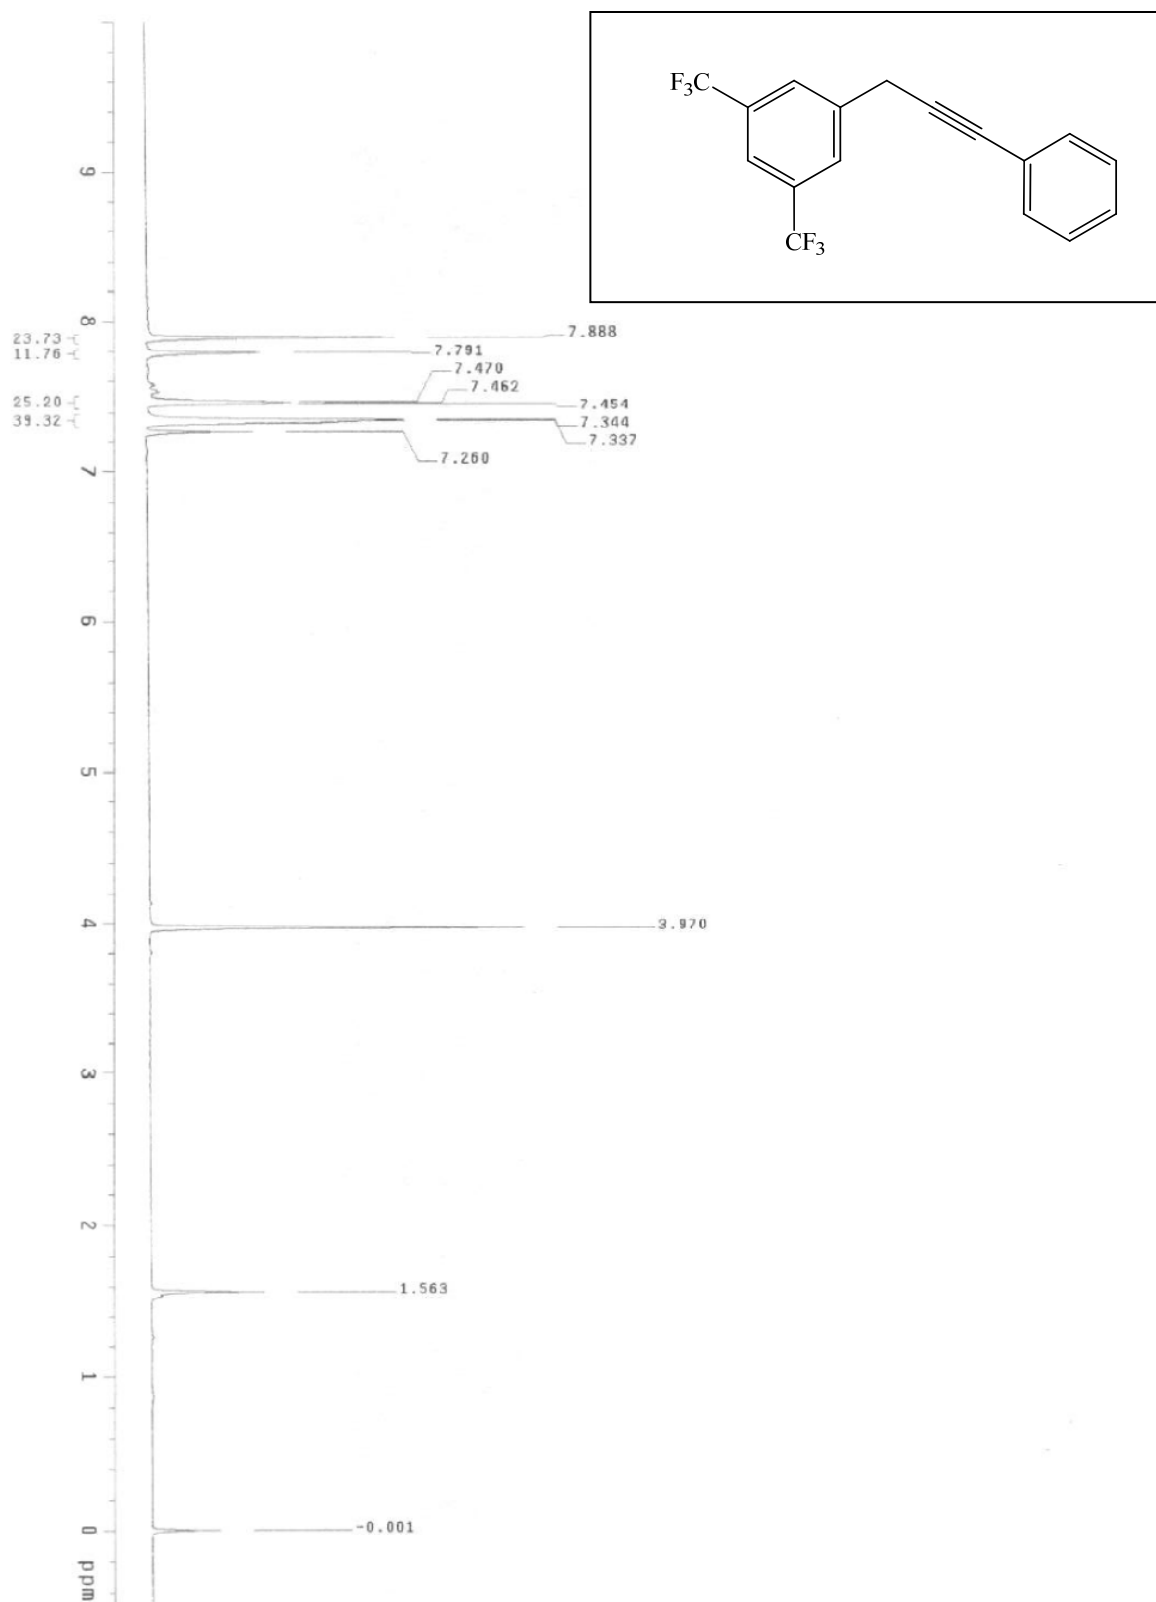

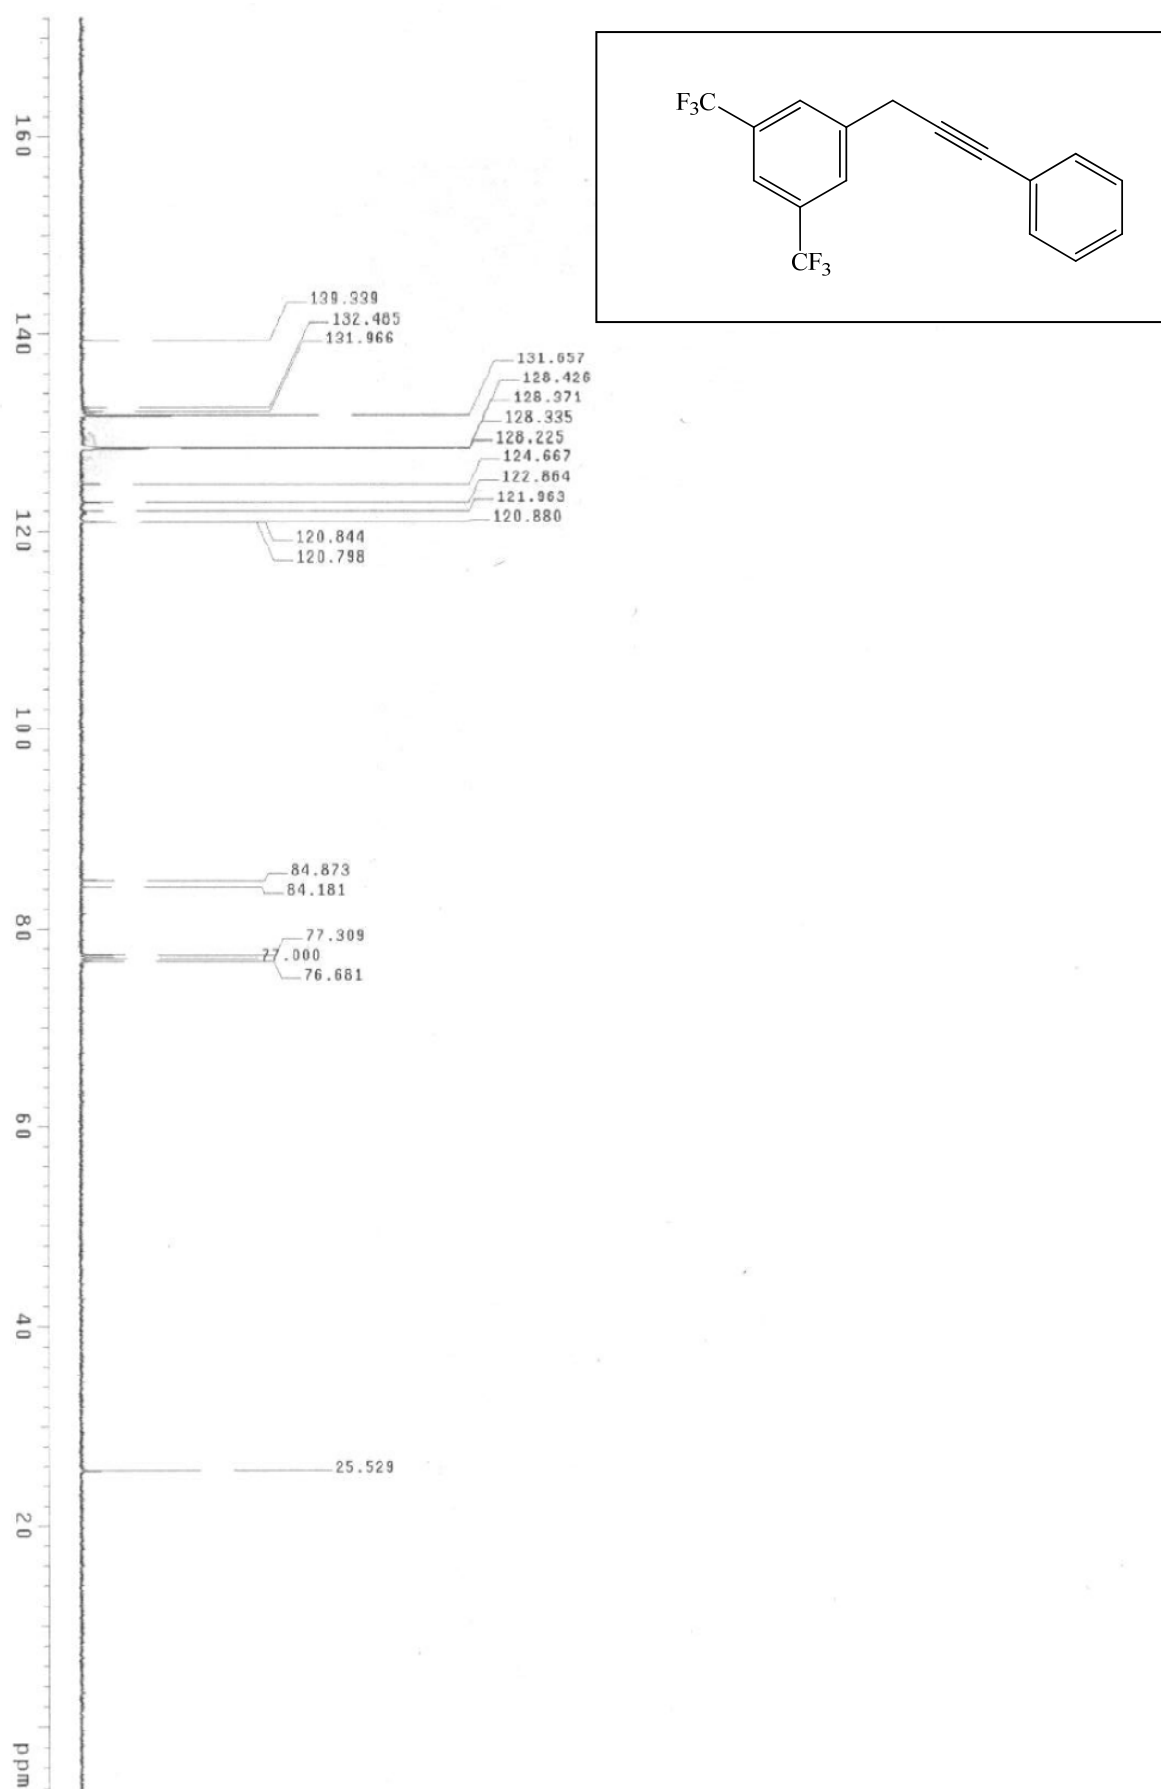

14. 2-(3-phenylprop-2-ynyl)thiophene (**2n**)

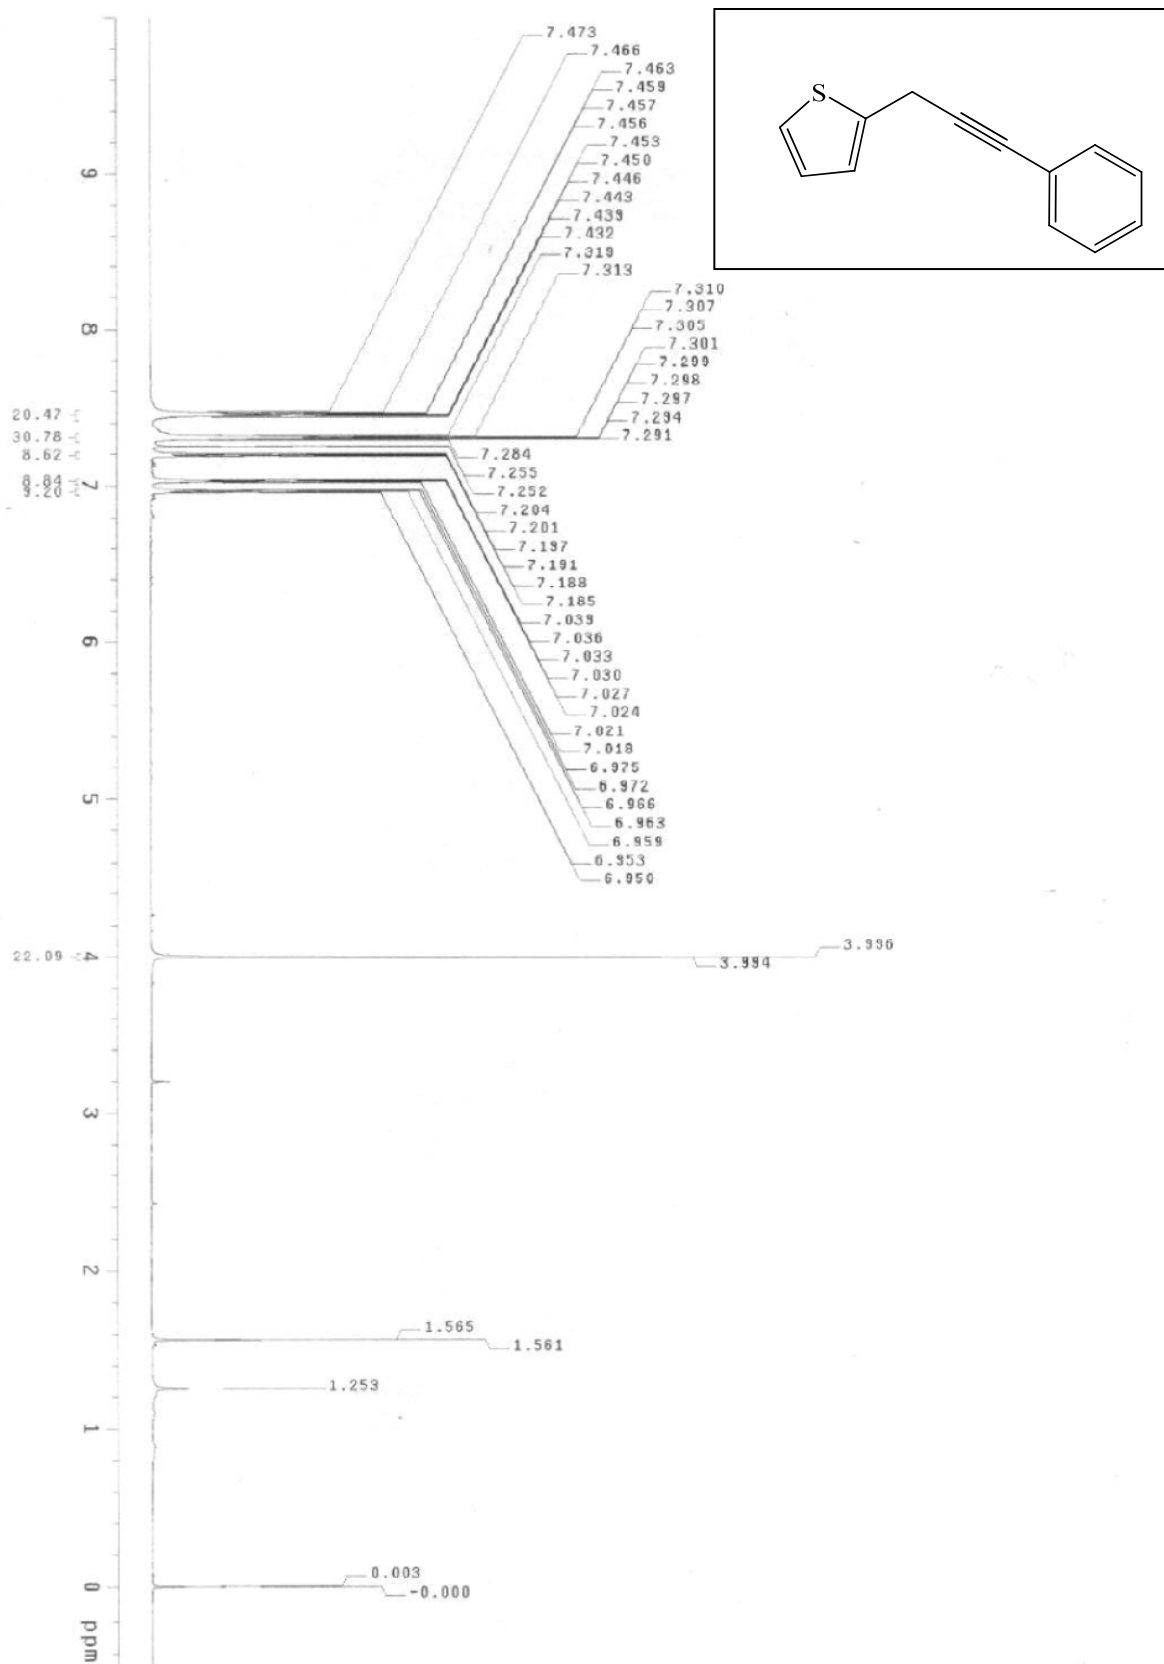

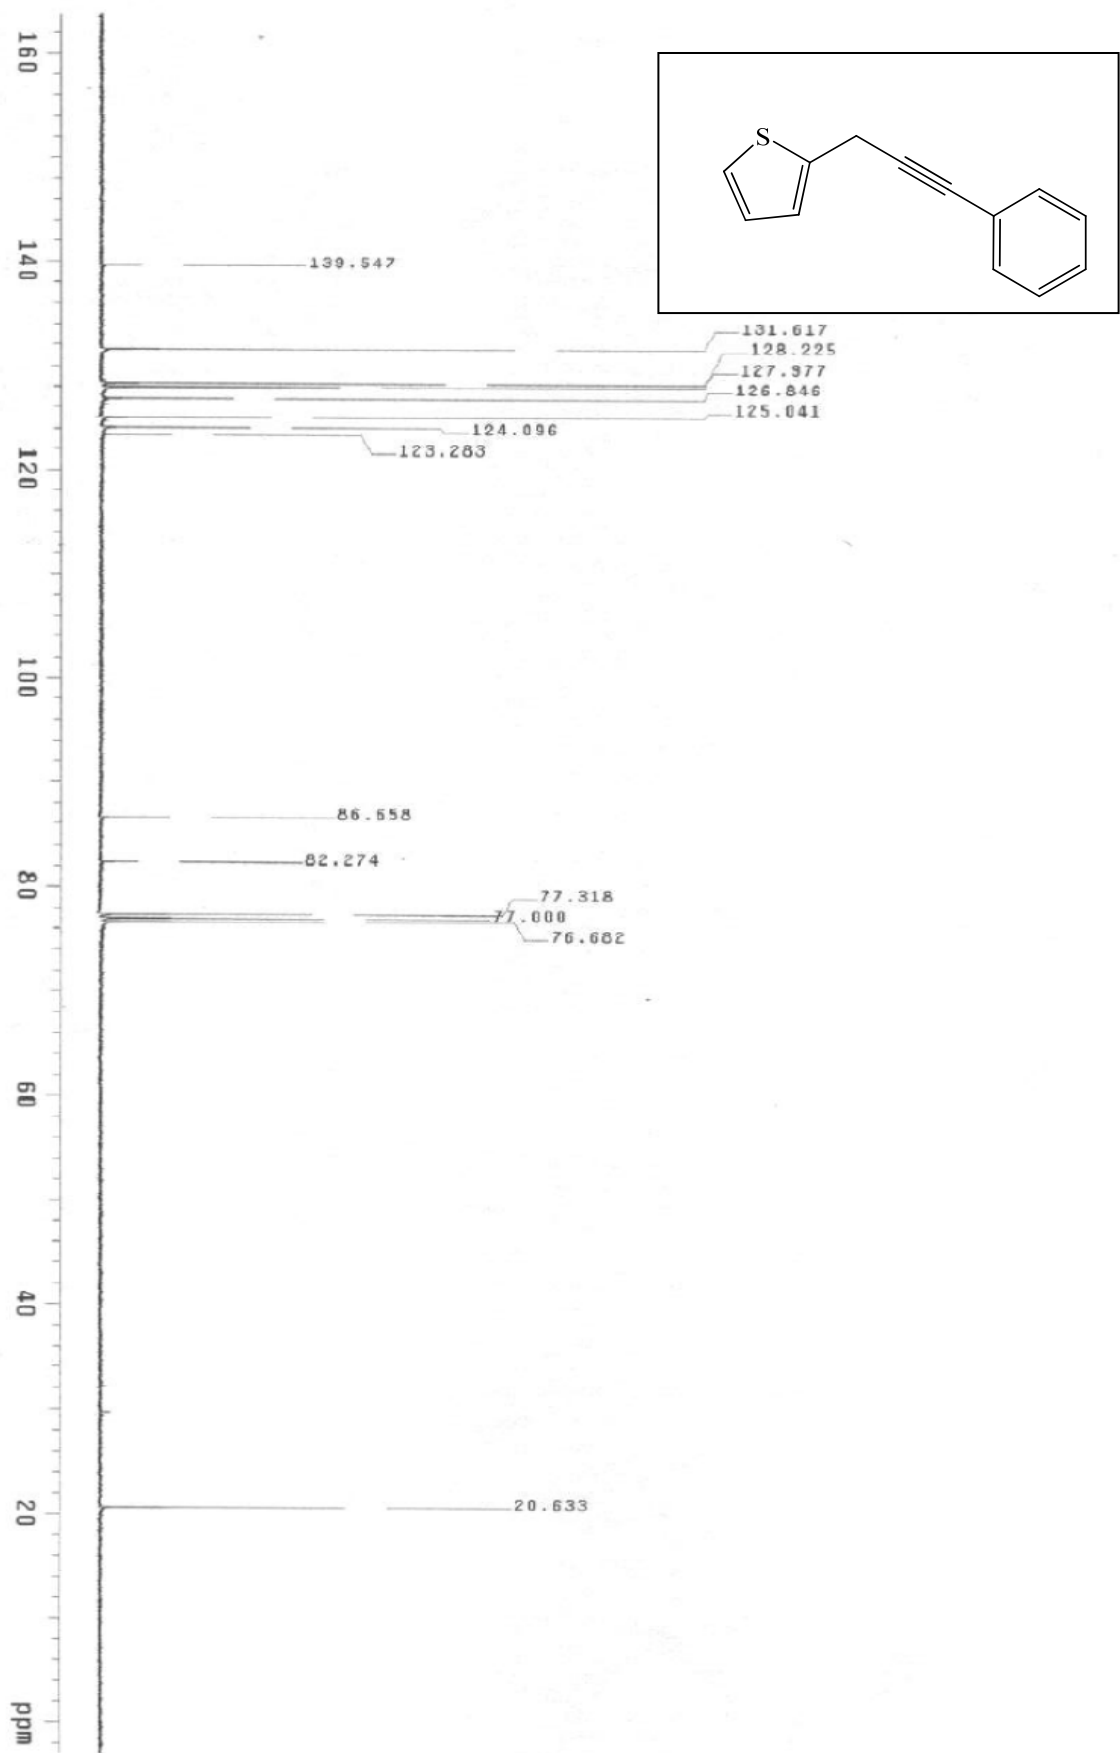

# 15. Hept-2-ynylbenzene (**2o**)

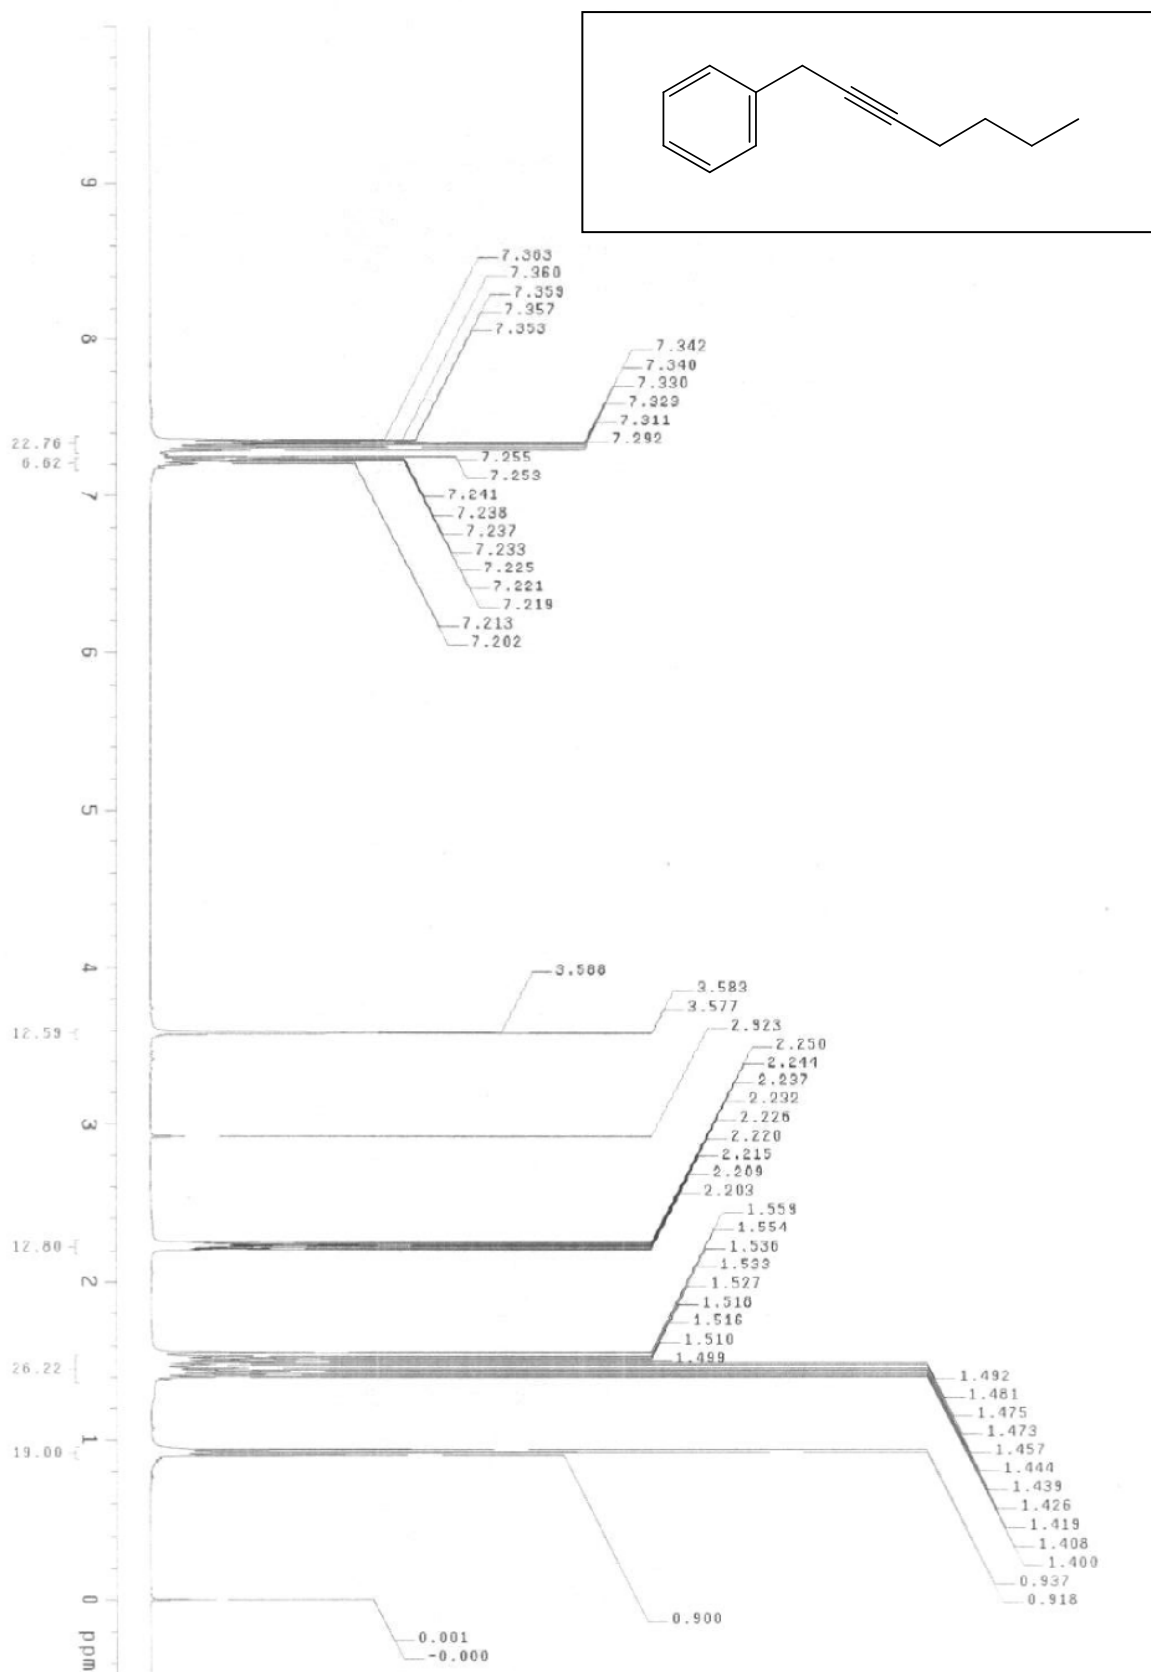

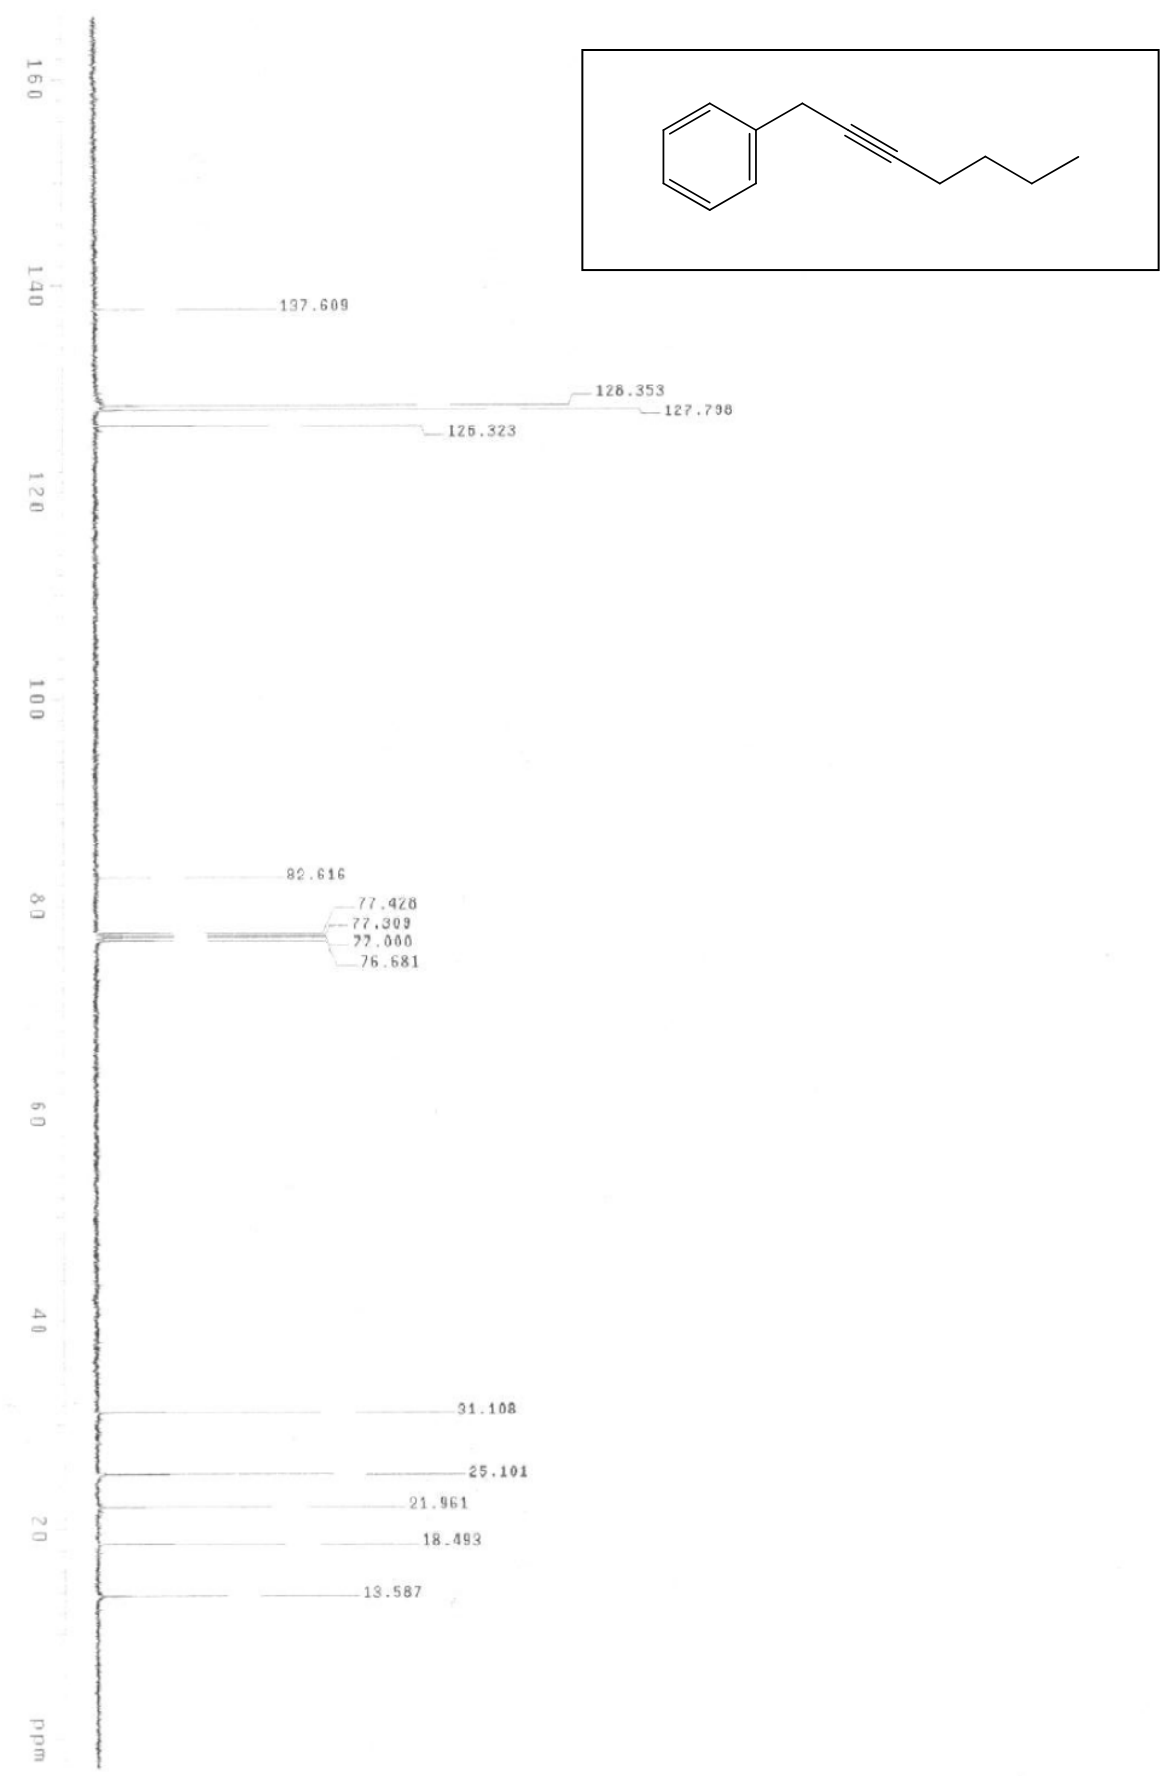

16. (7-chlorohept-2-ynyl)benzene (**2p**)

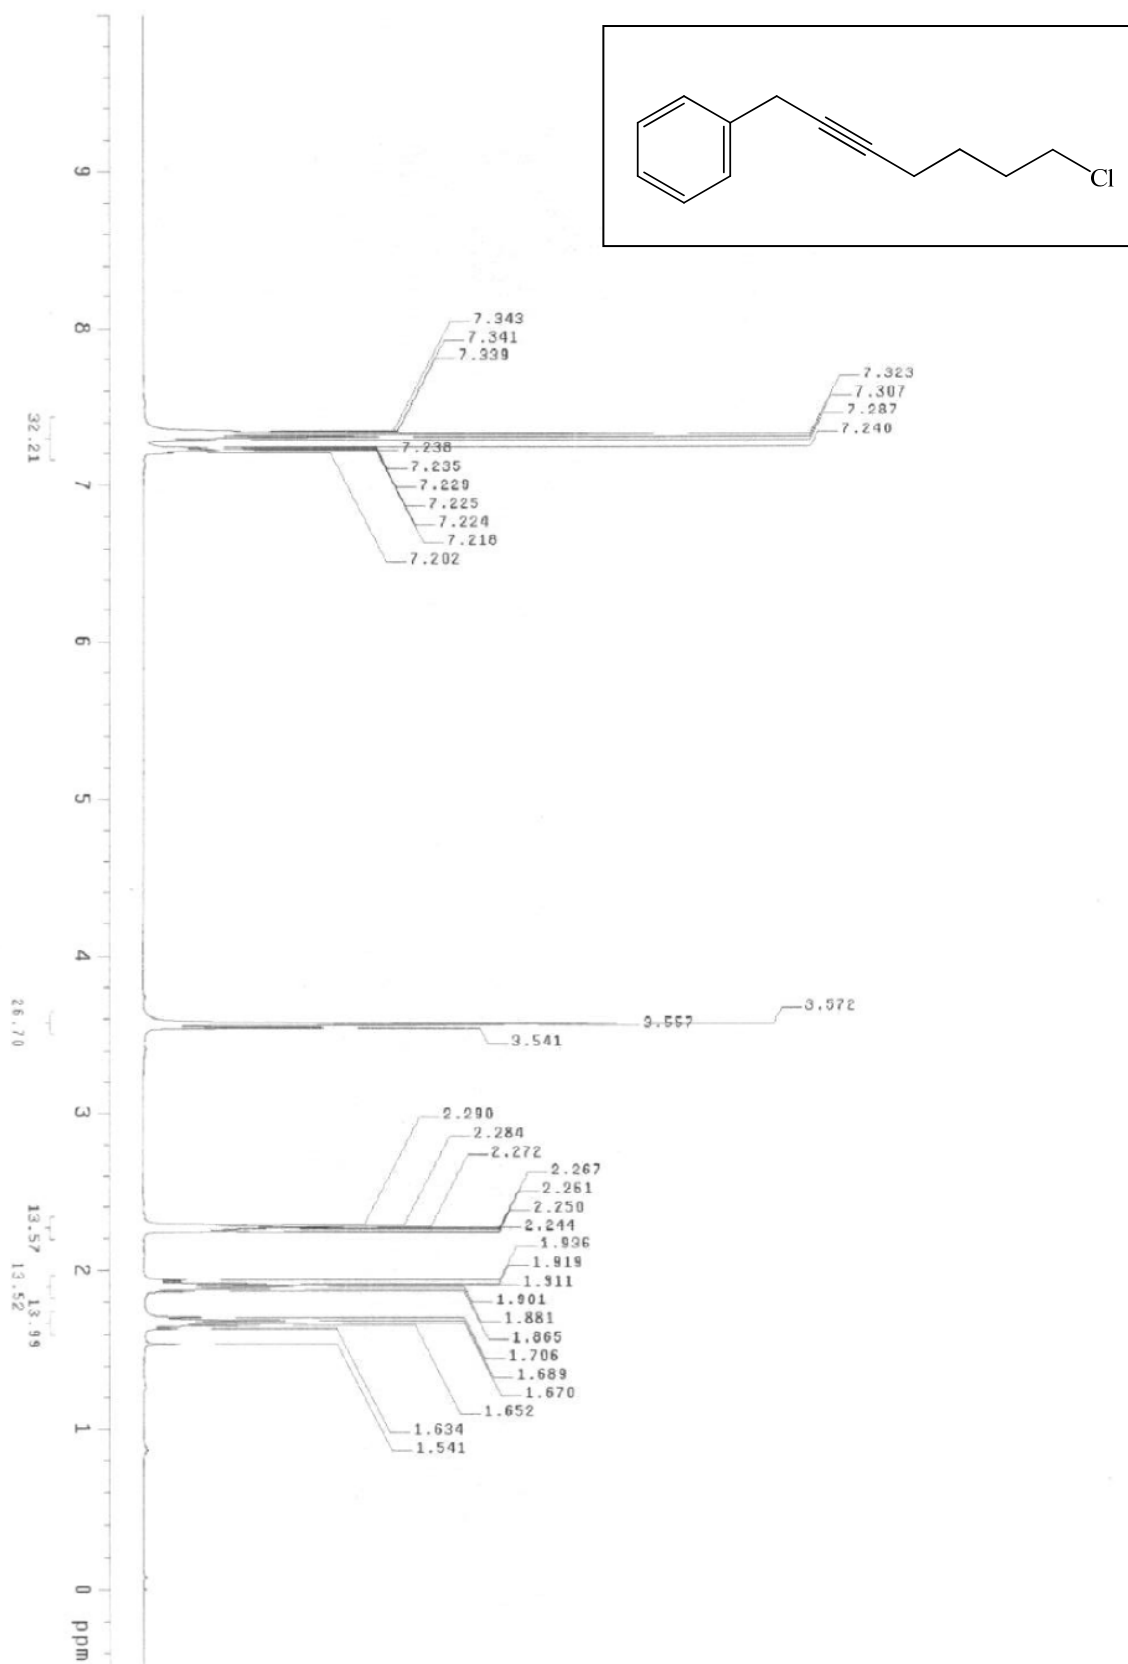

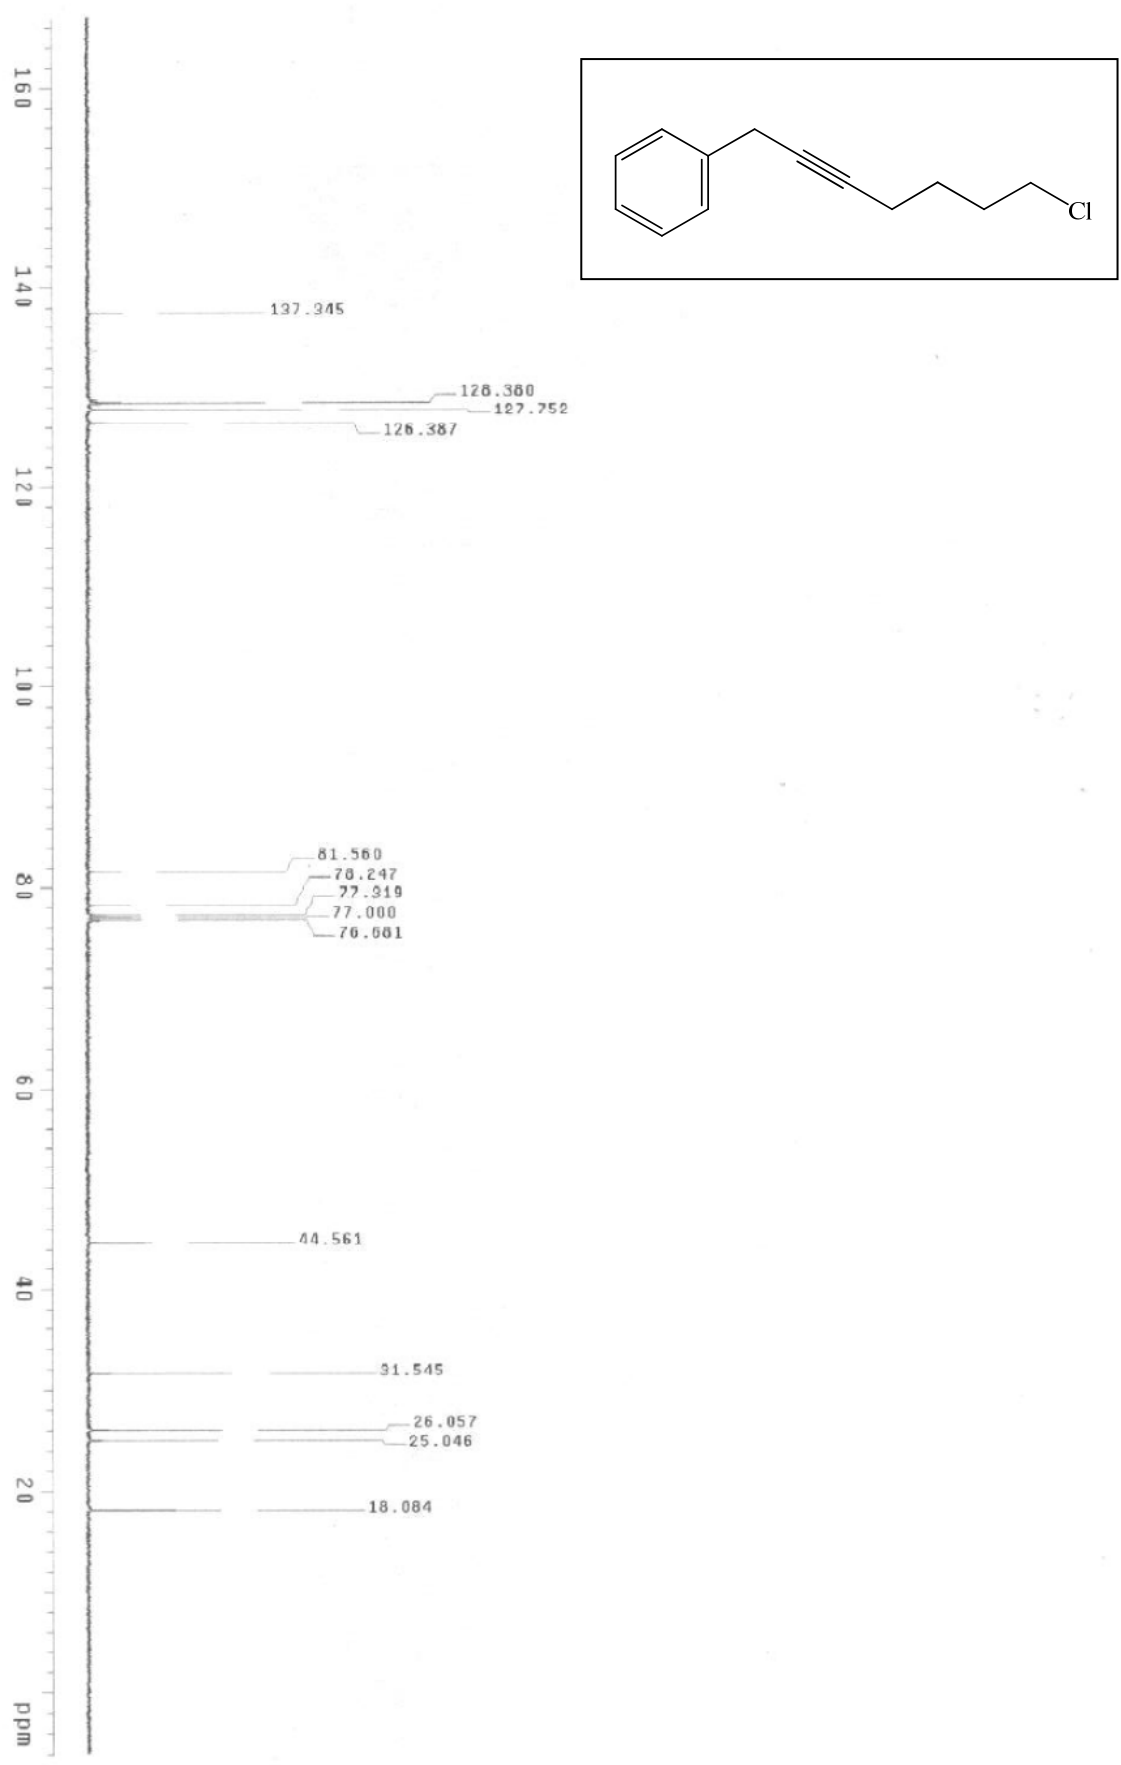

17. 1,4-diphenylbut-2-yne (**2q**)

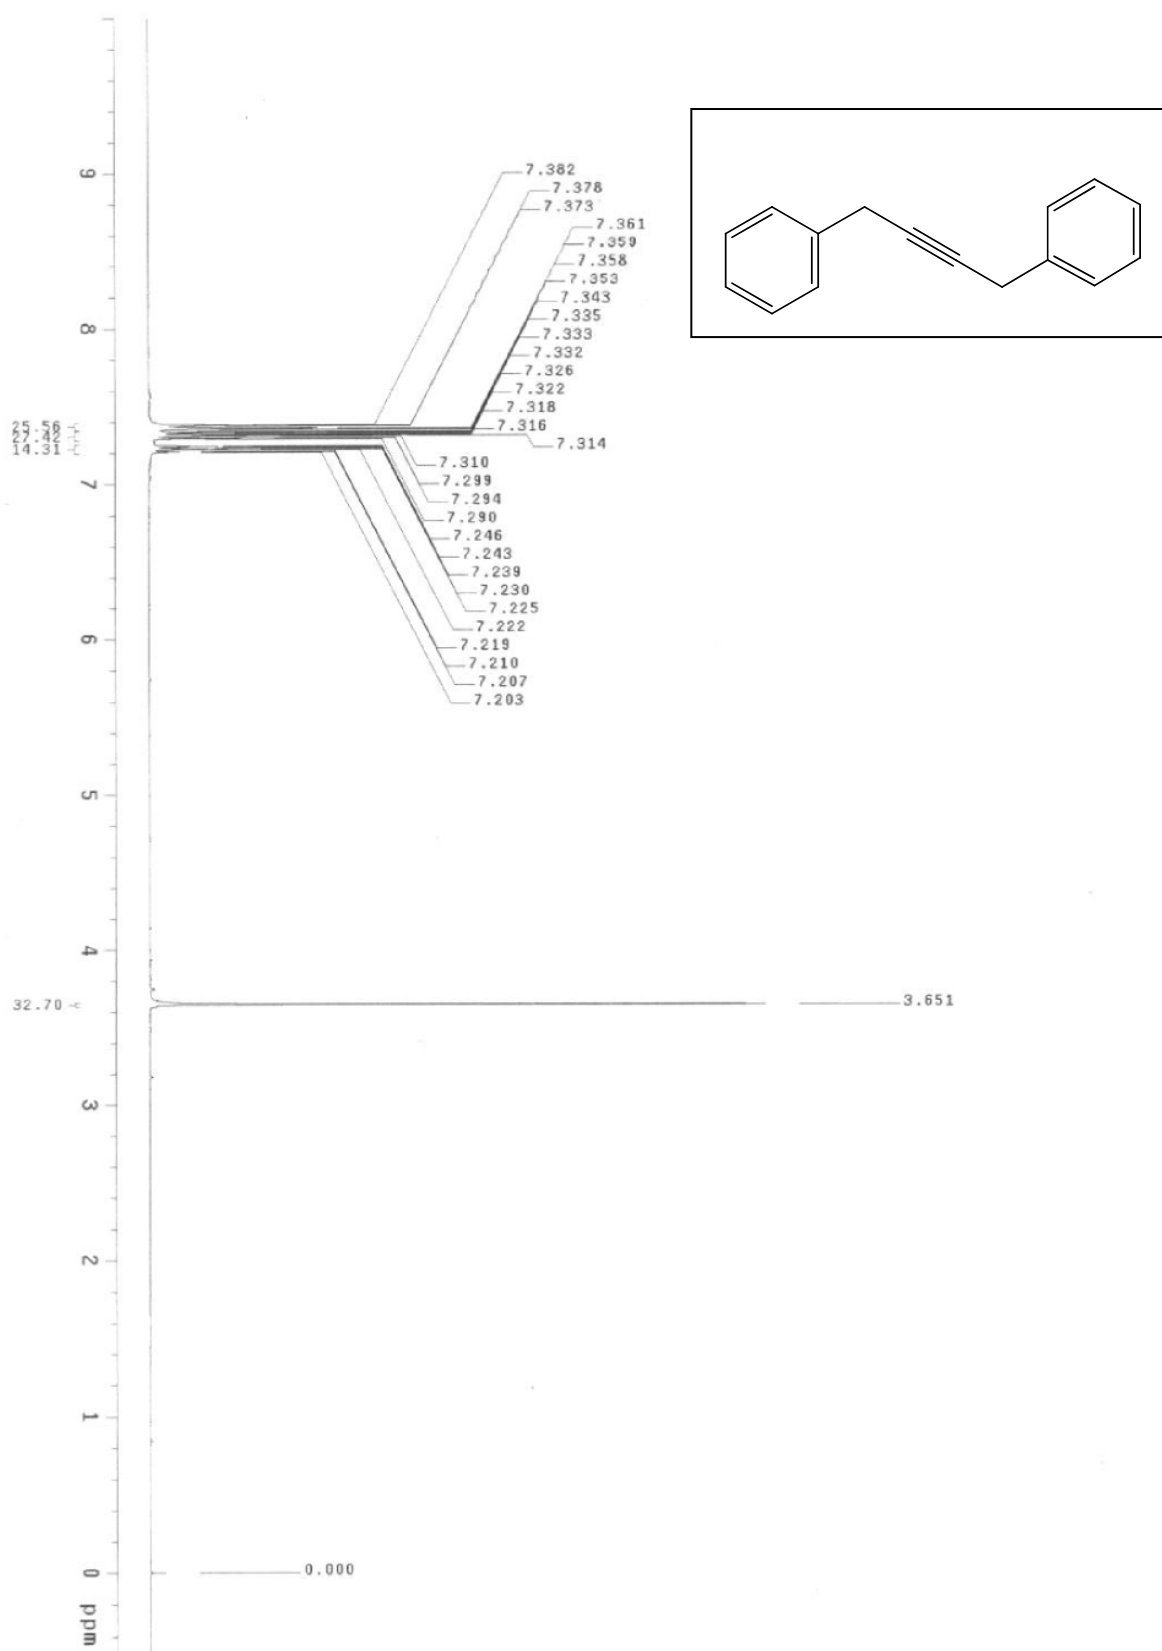

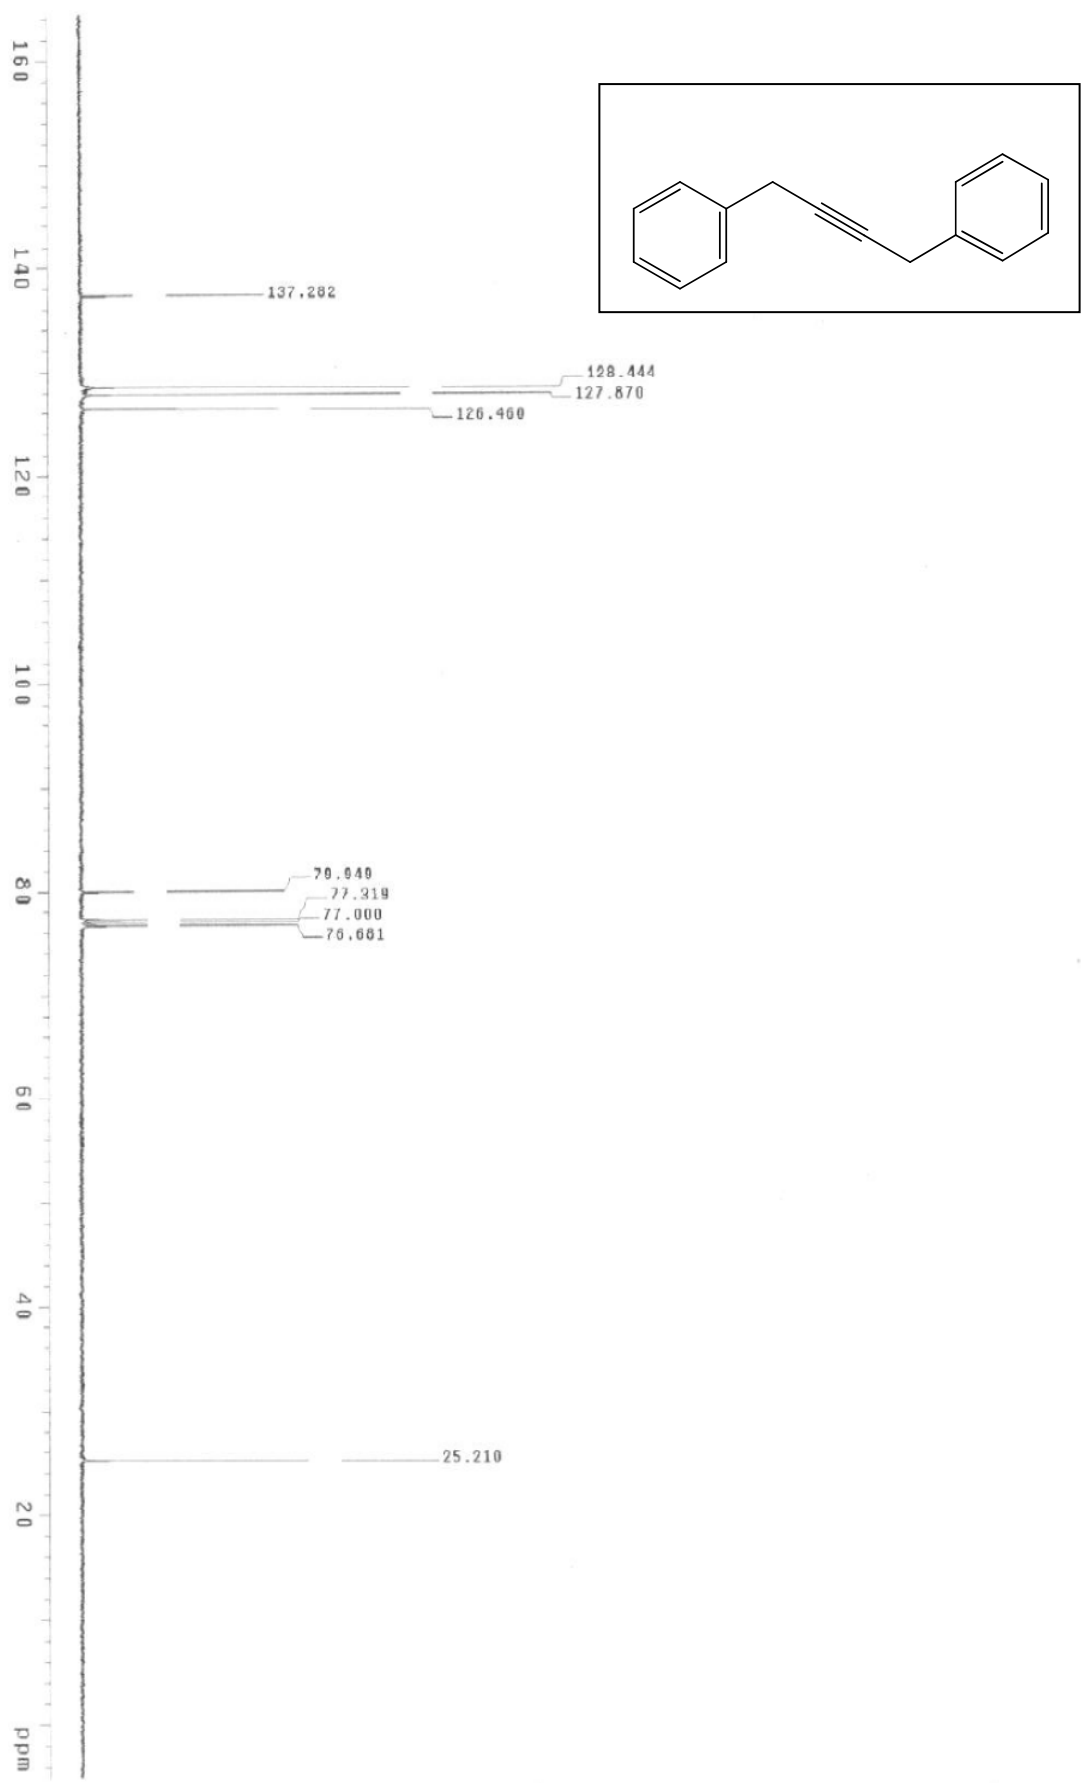

18. 4-(3-(trimethylsilyl)prop-2-ynyl)benzonitrile (**2r**)

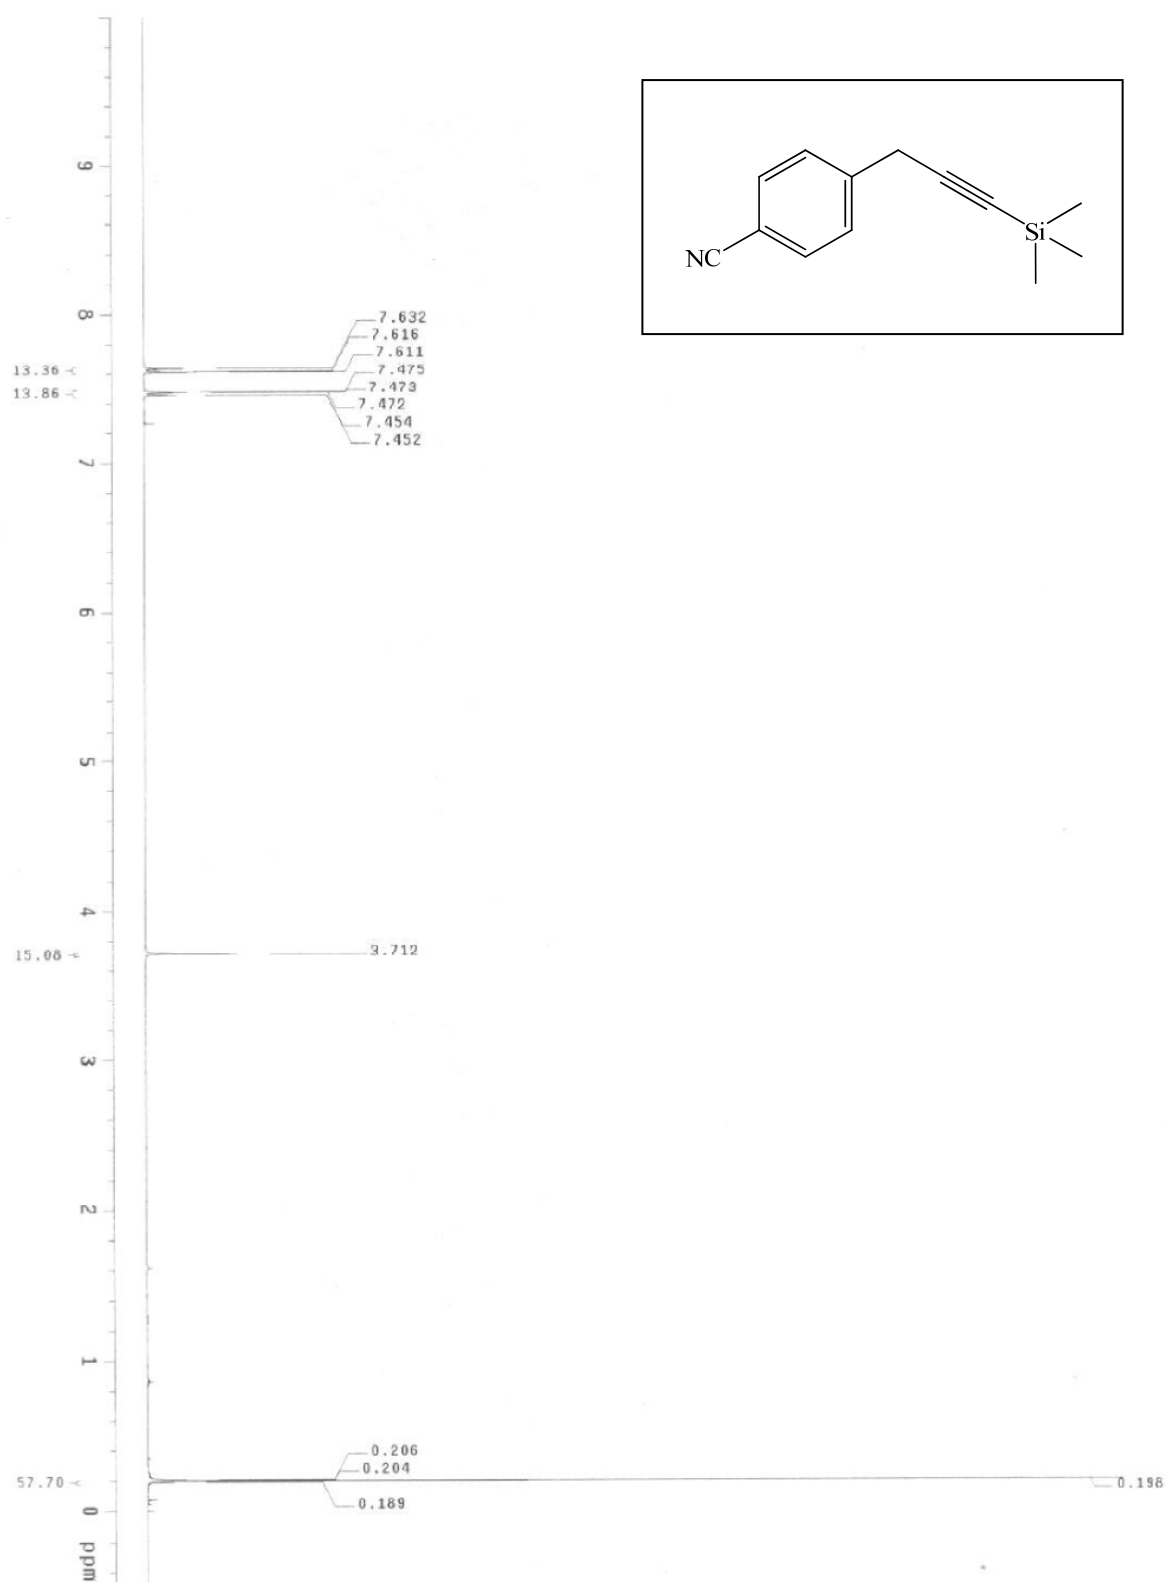

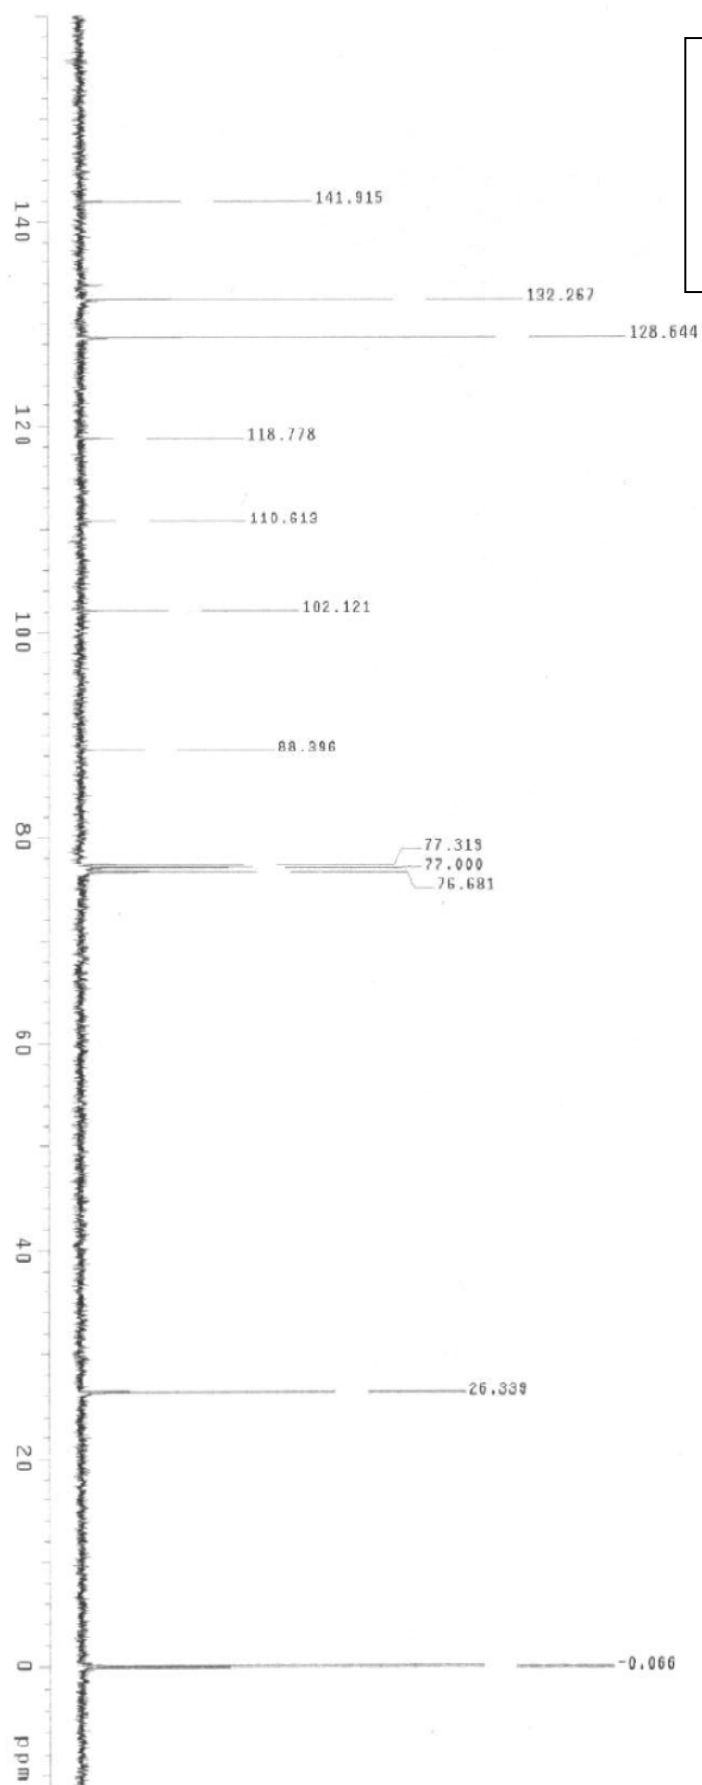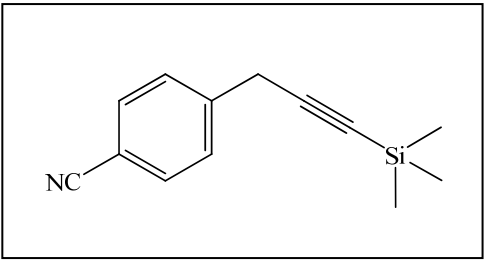

19. 2-methyl-6-(3-(trimethylsilyl)prop-2-ynyl)pyridine (**2s**)

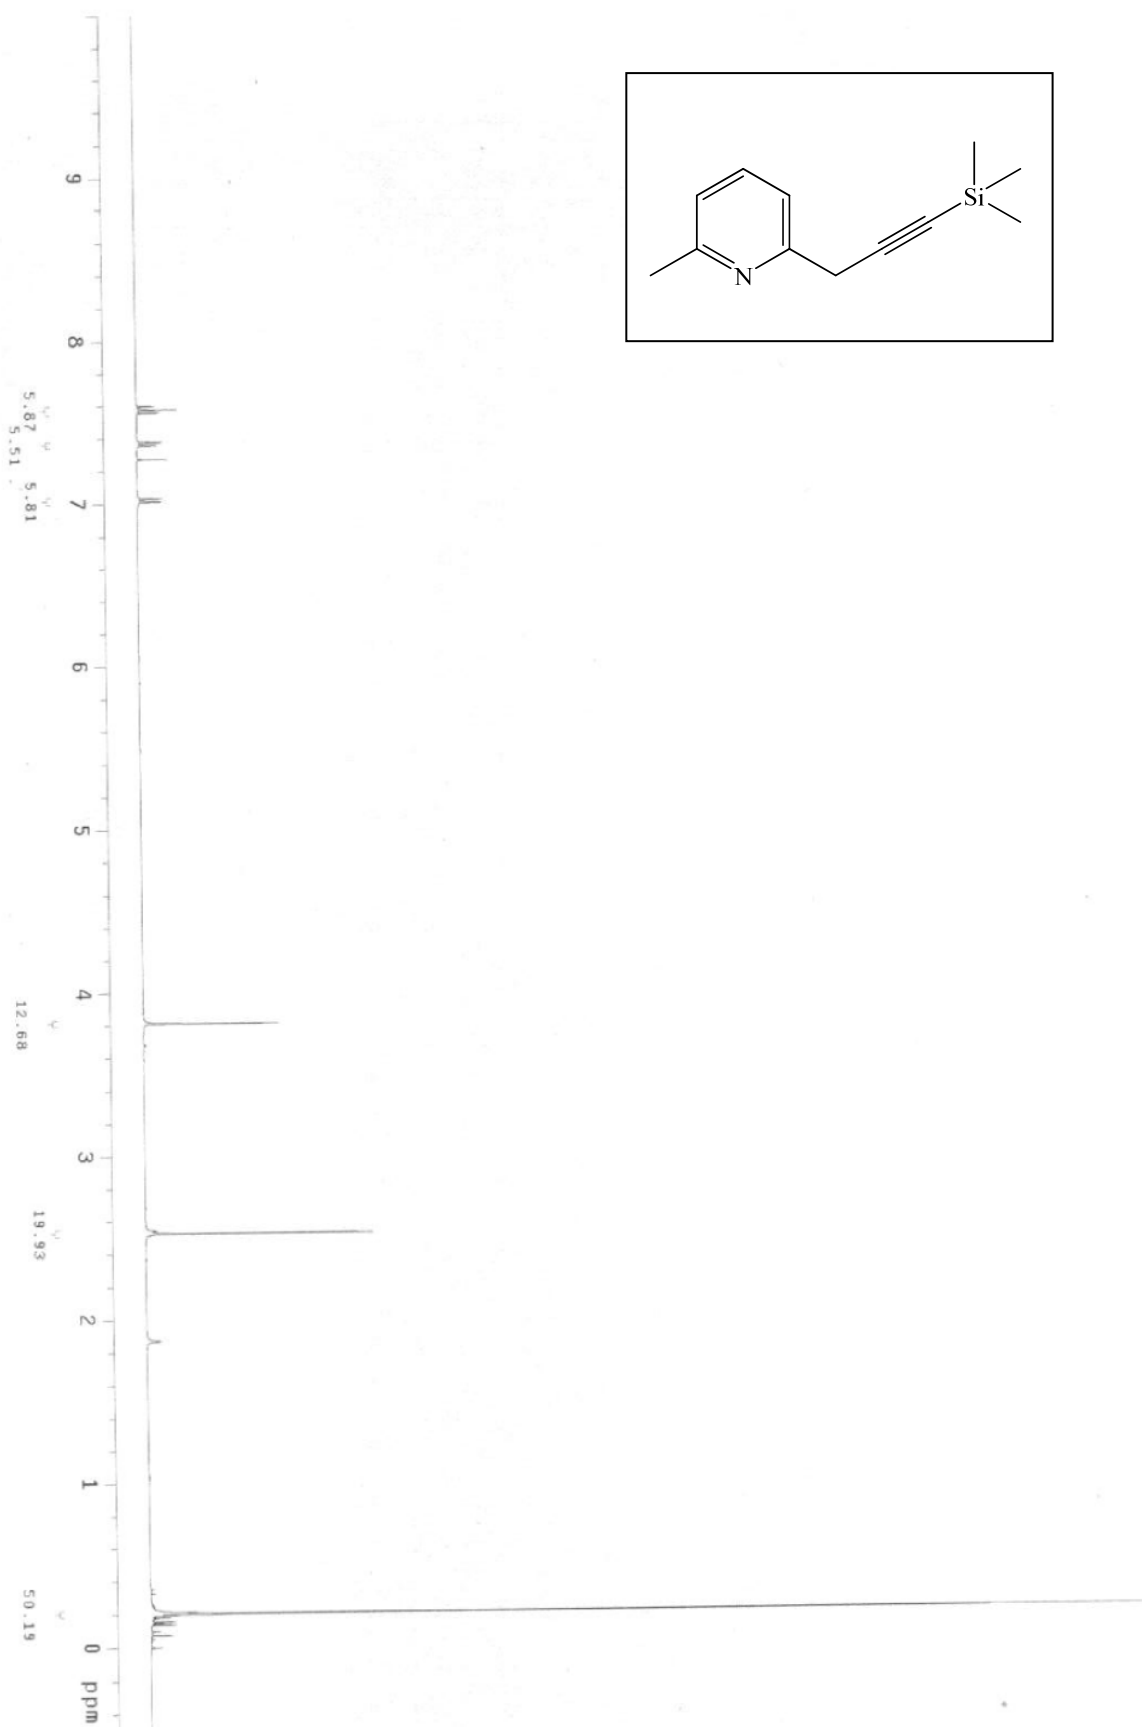

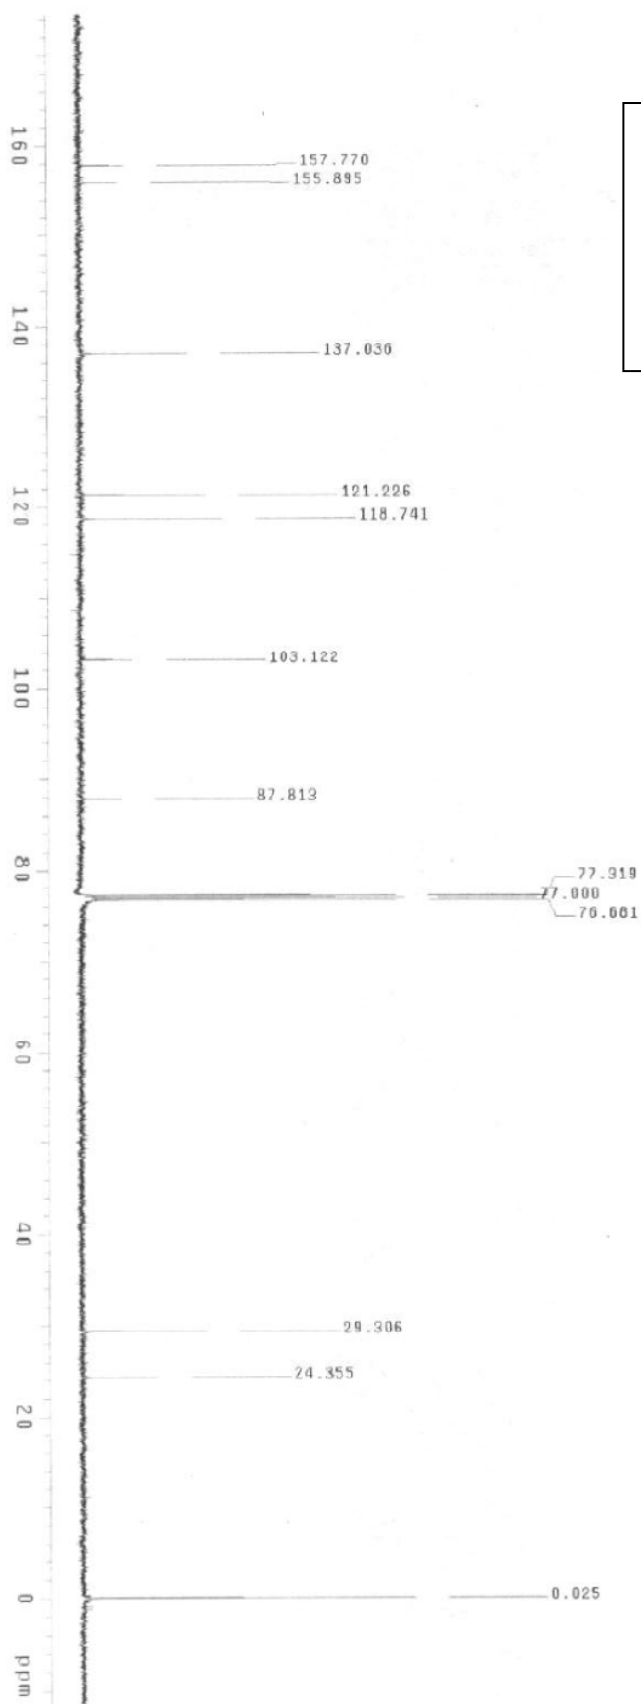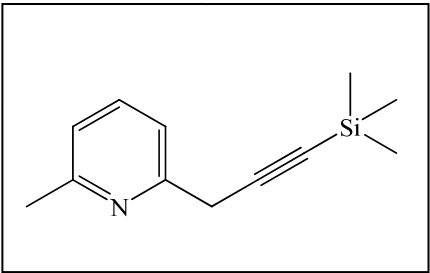

20. 1,2-diphenylethyne (**2t**)

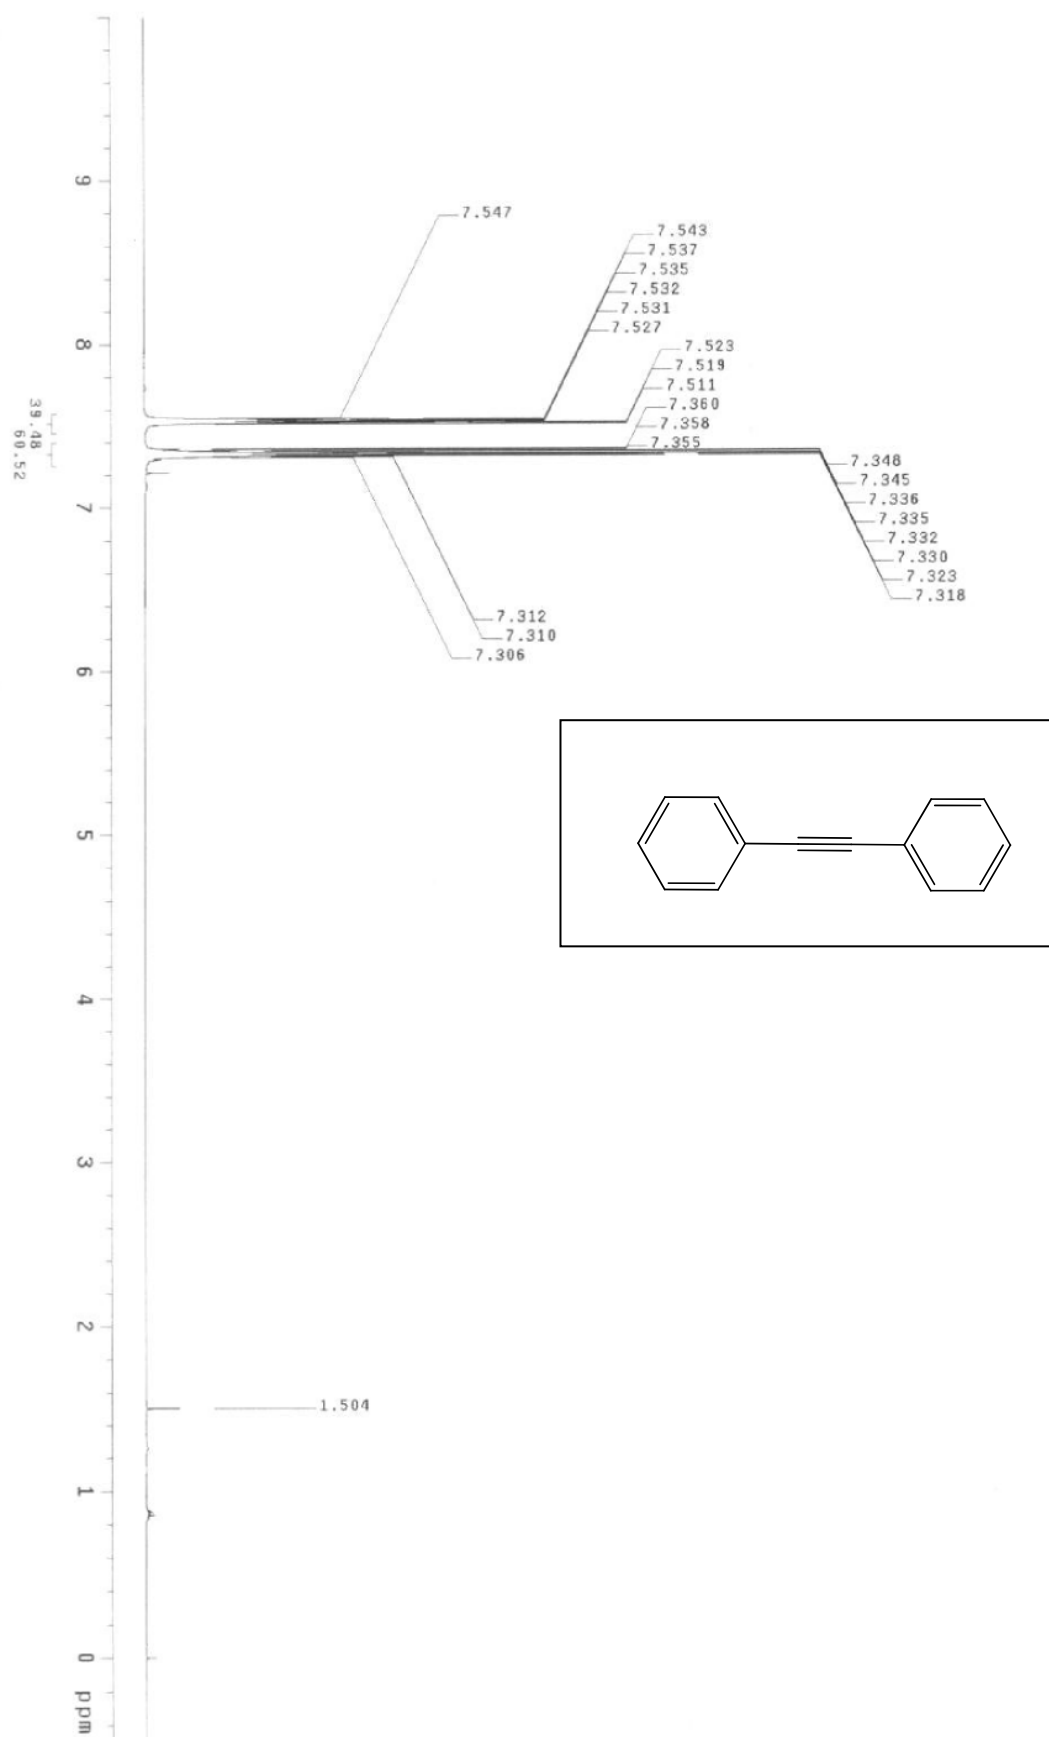

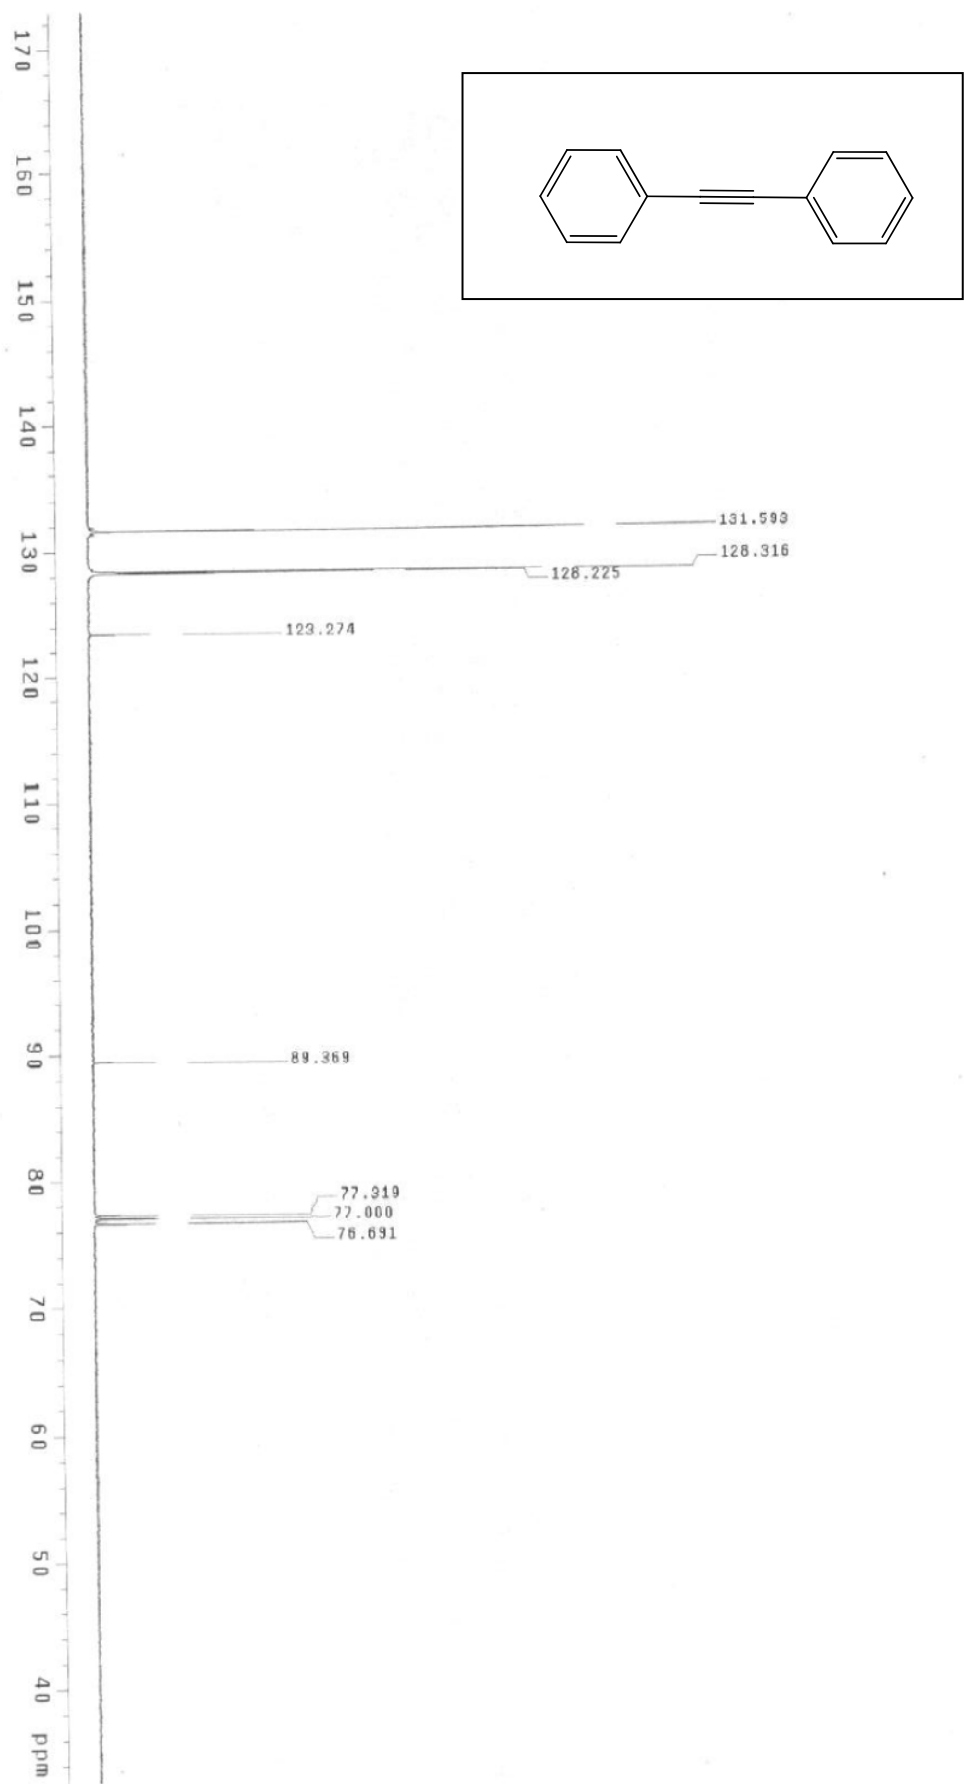

21. 1-methyl-4-(phenylethynyl)benzene (**2u**)

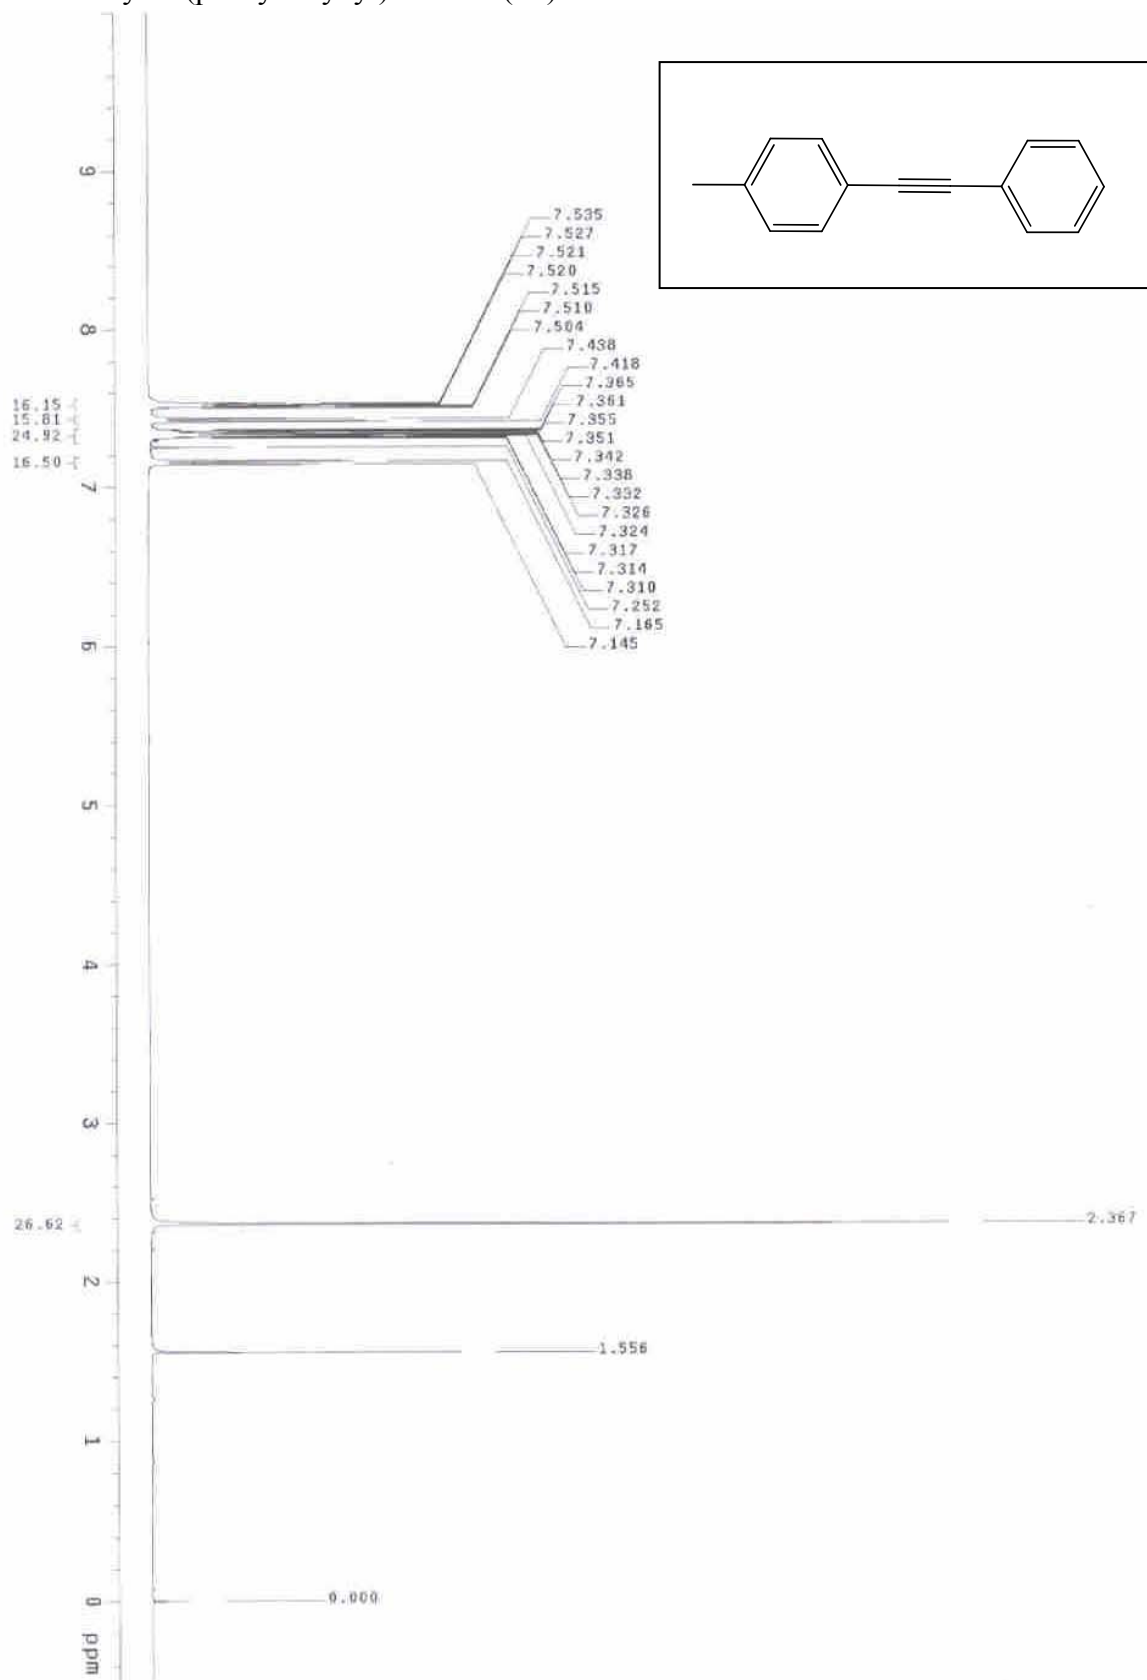

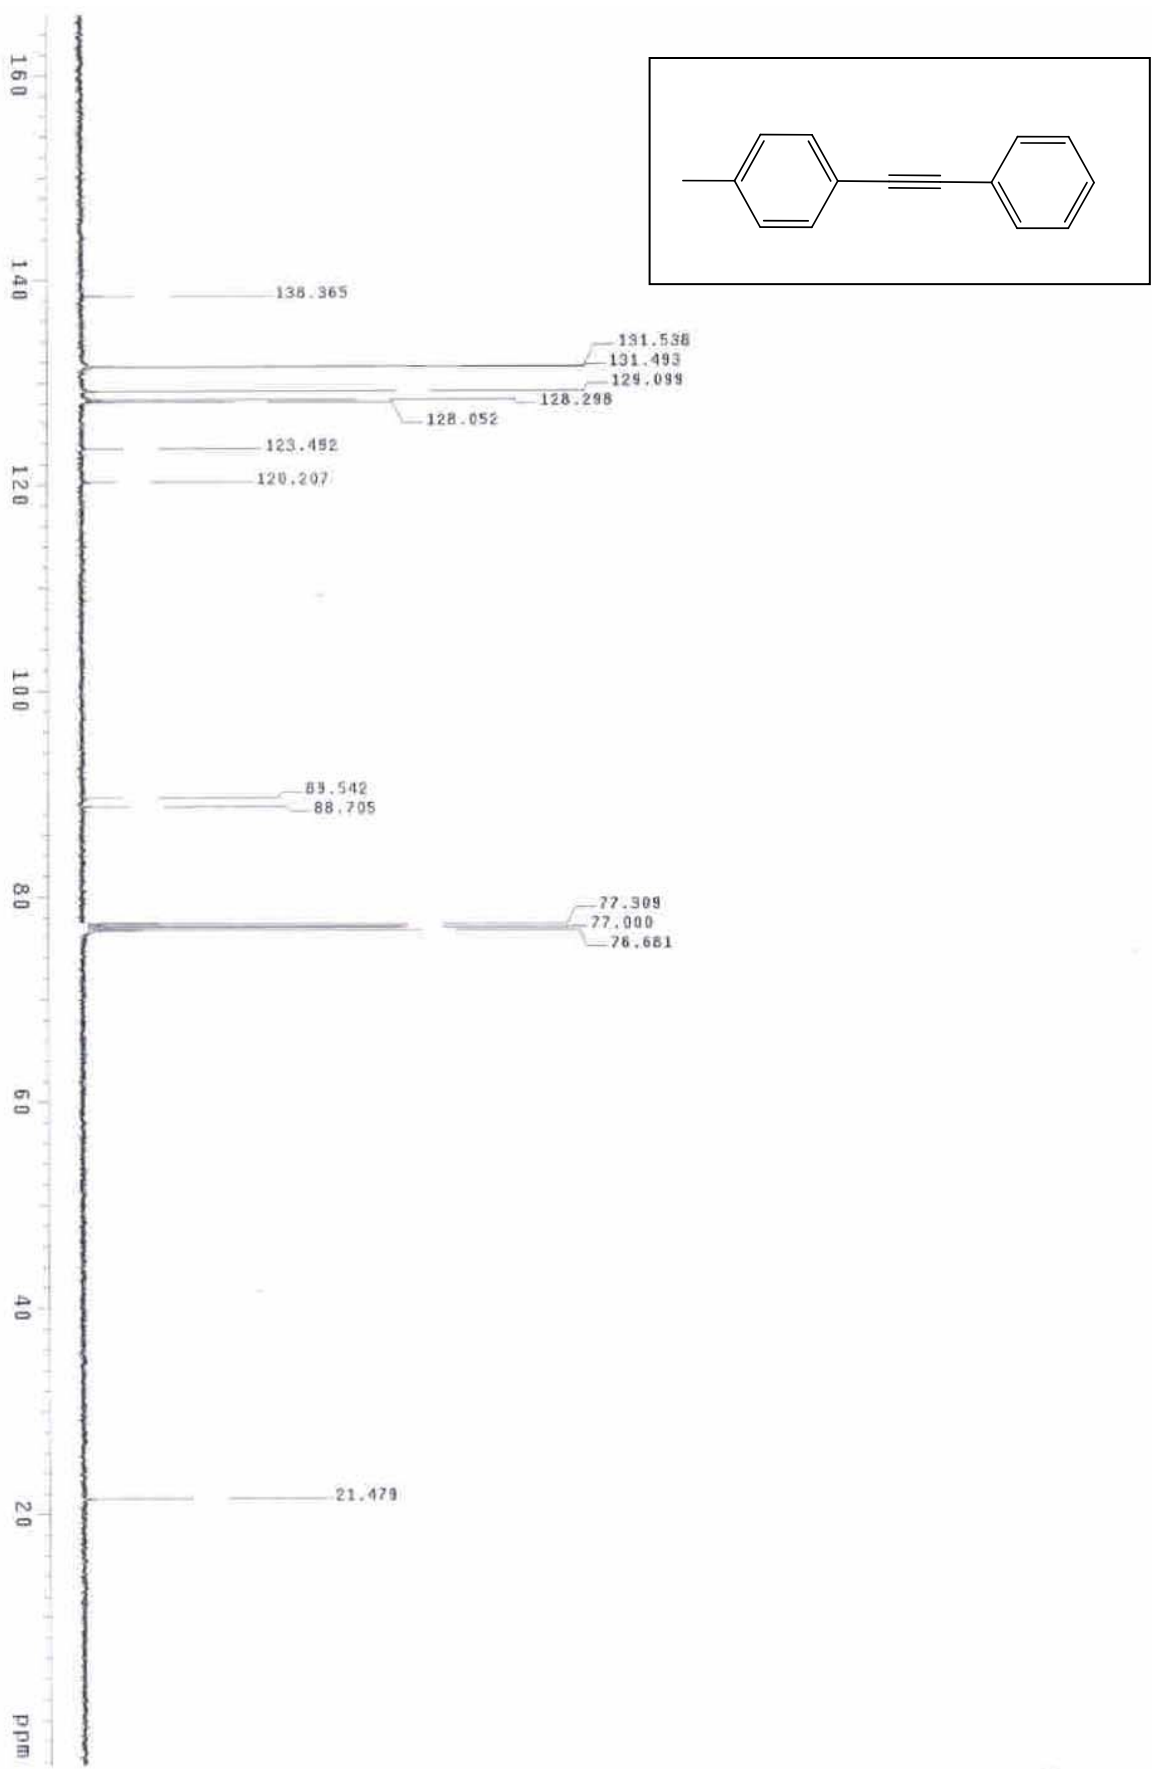

22. 1,3-dimethyl-5-(phenylethynyl)benzene (**2v**)

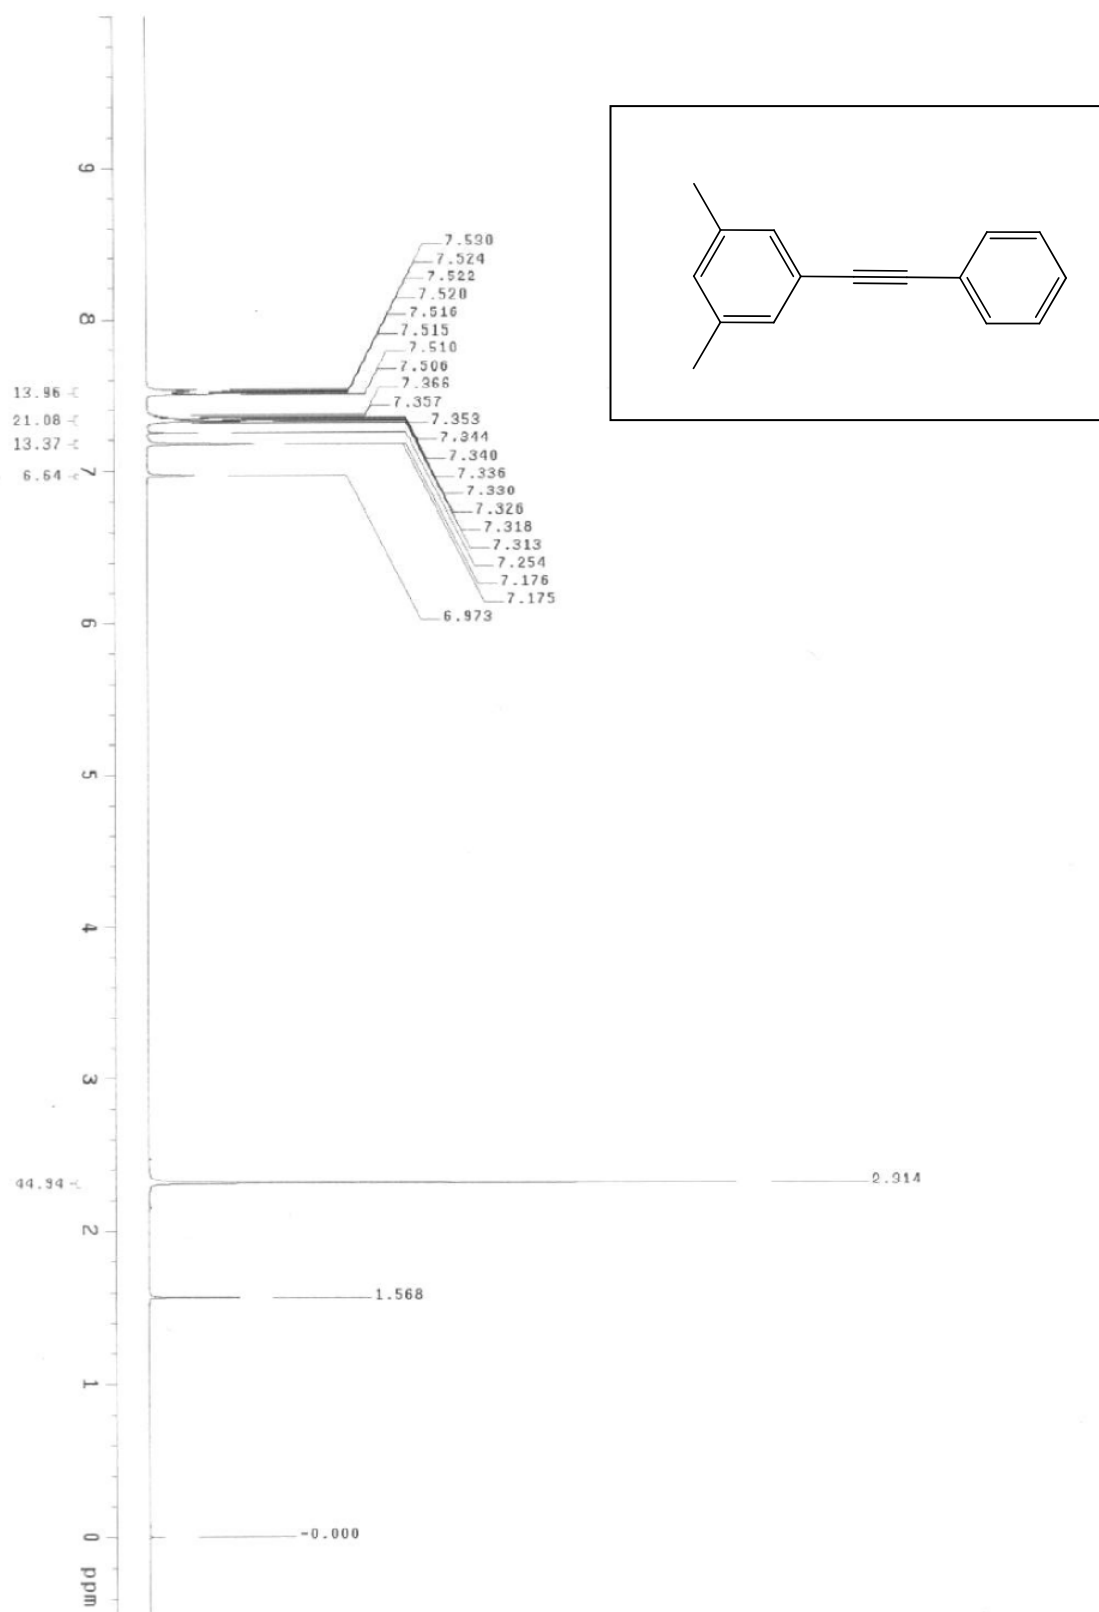

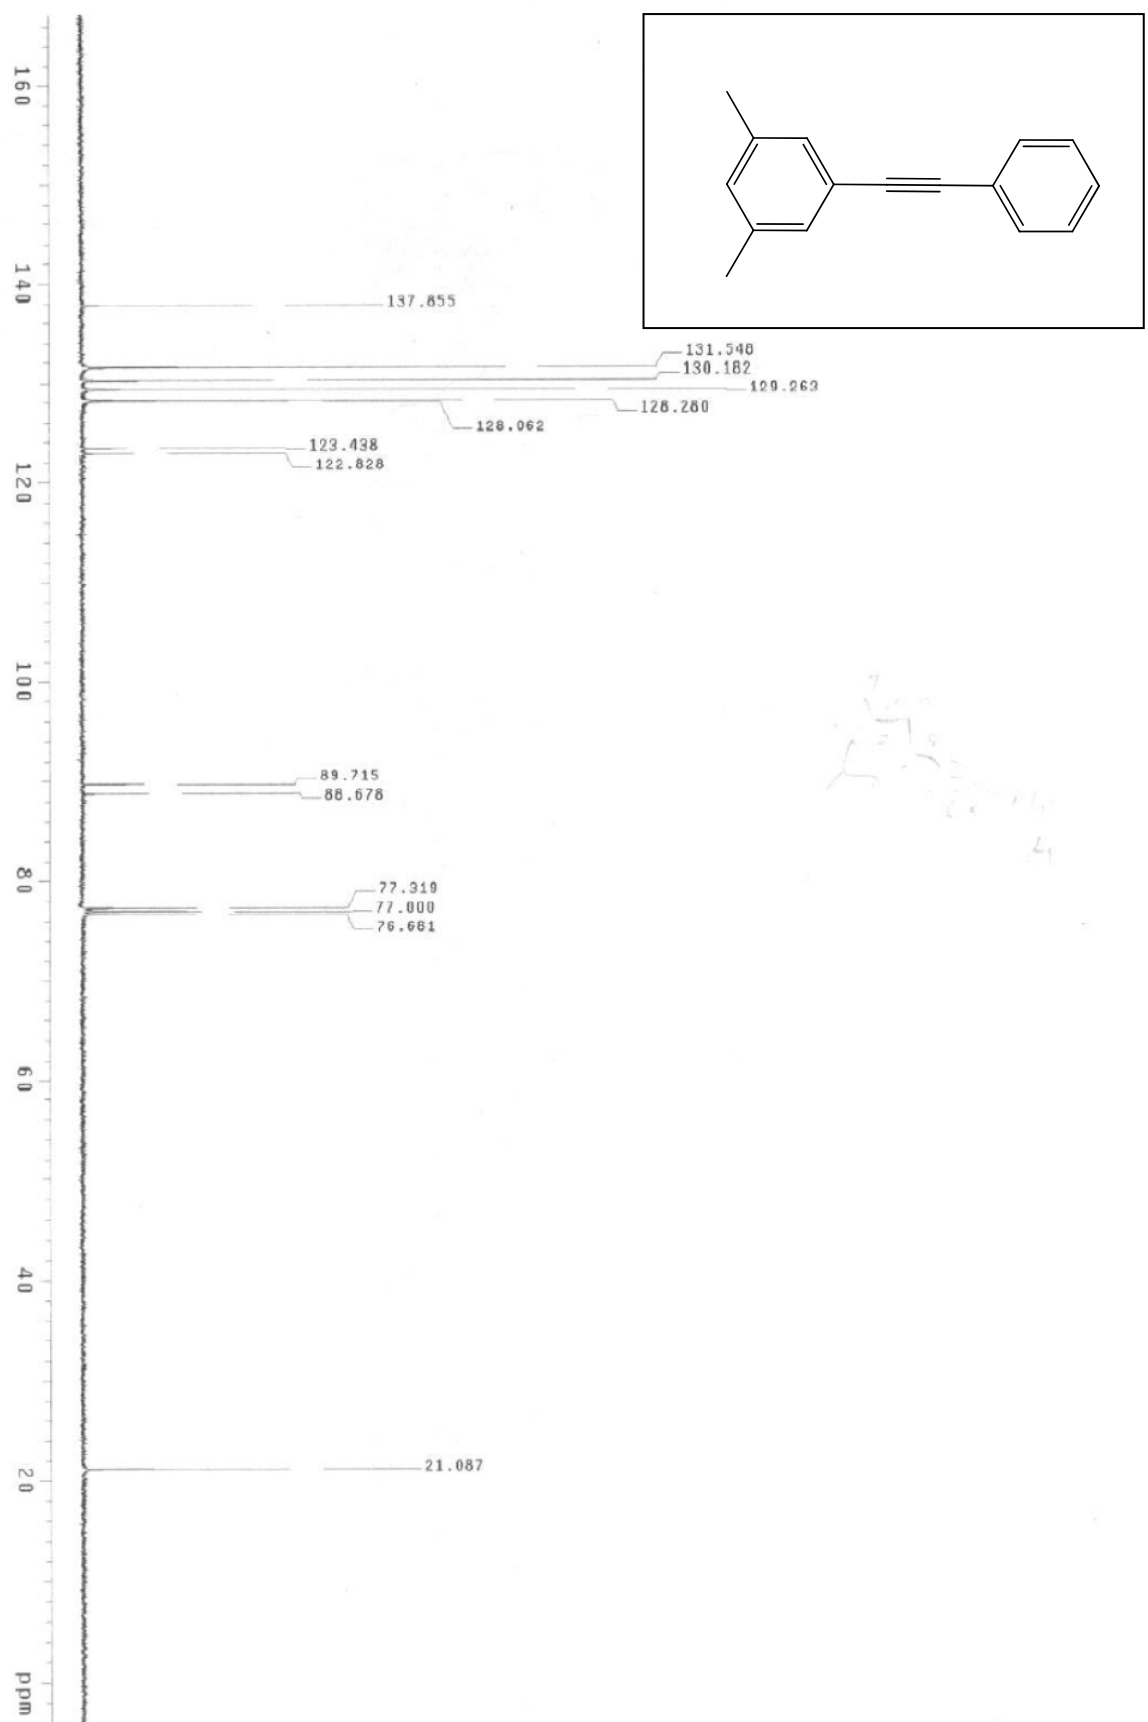

23. trimethyl(4-(phenylethynyl)phenyl)silane (**2w**)

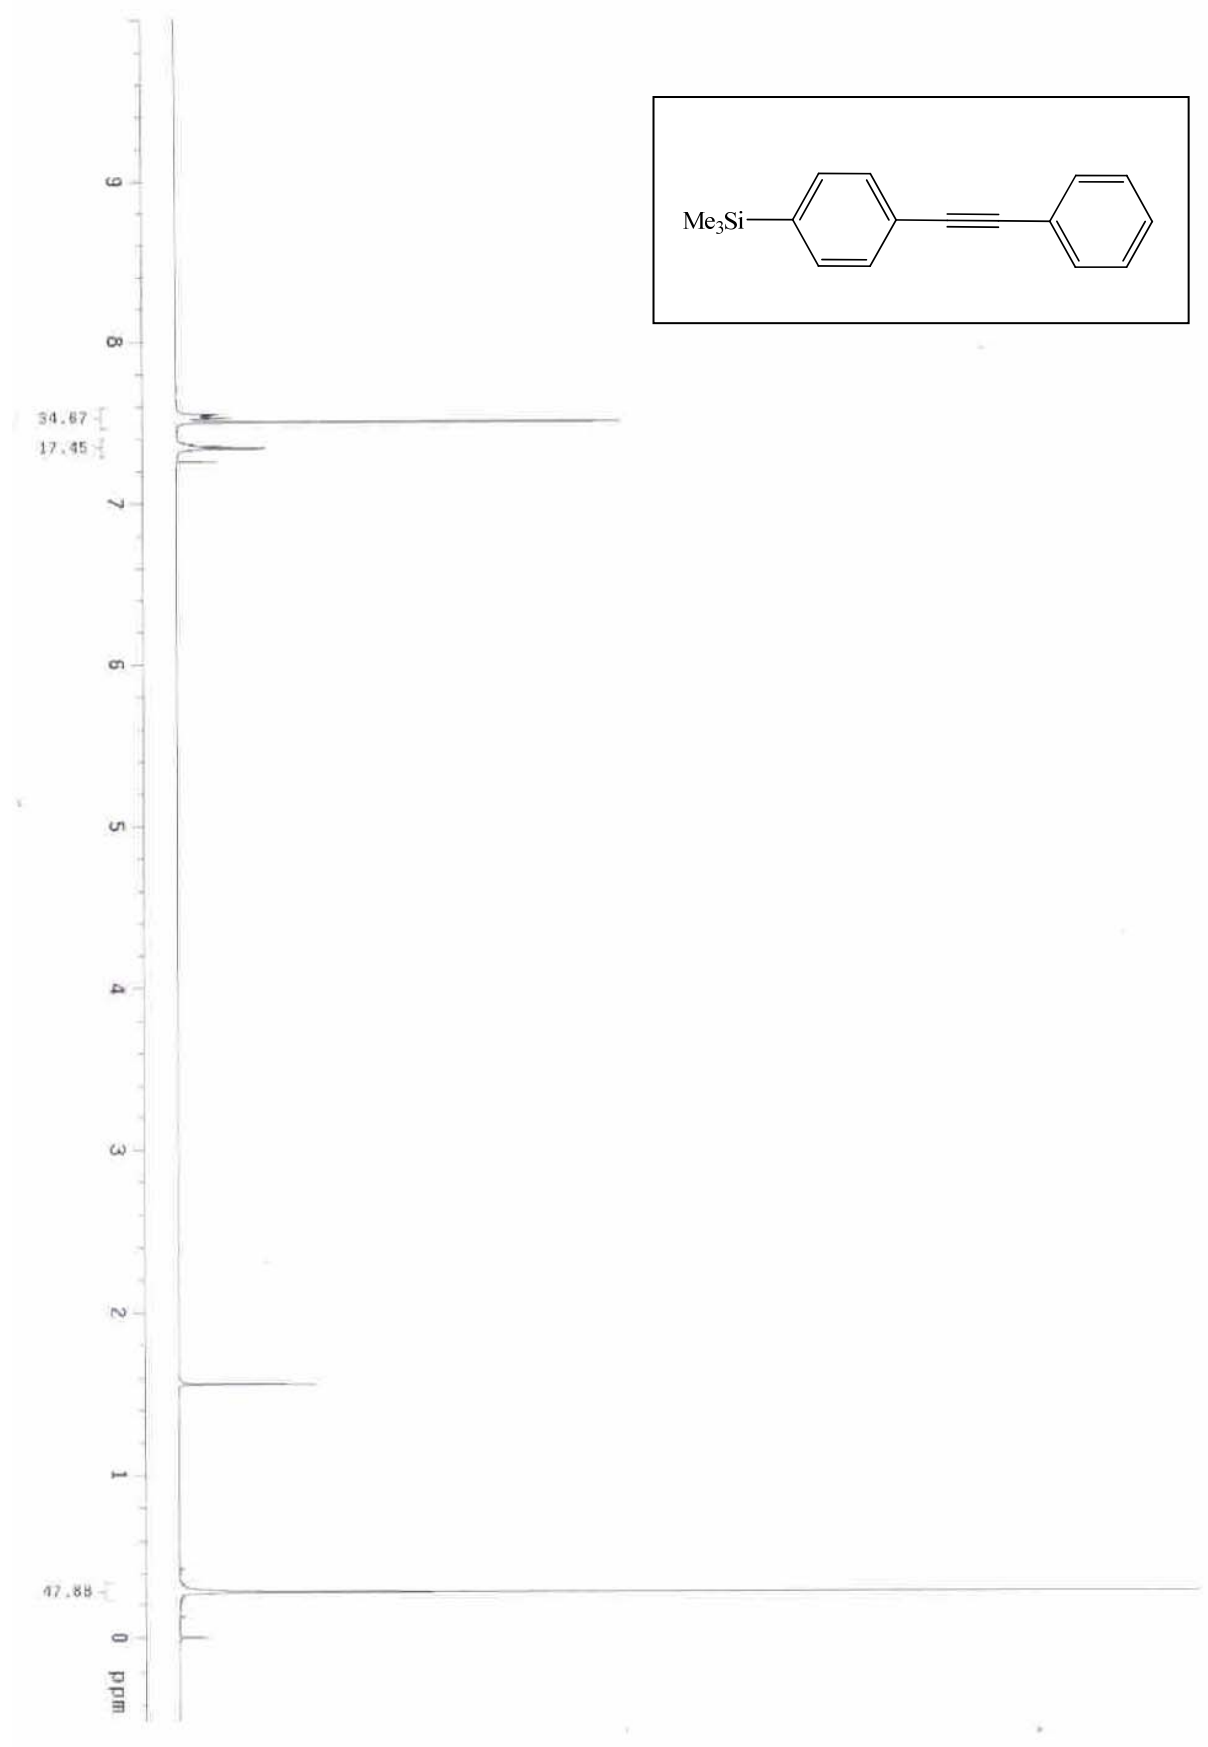

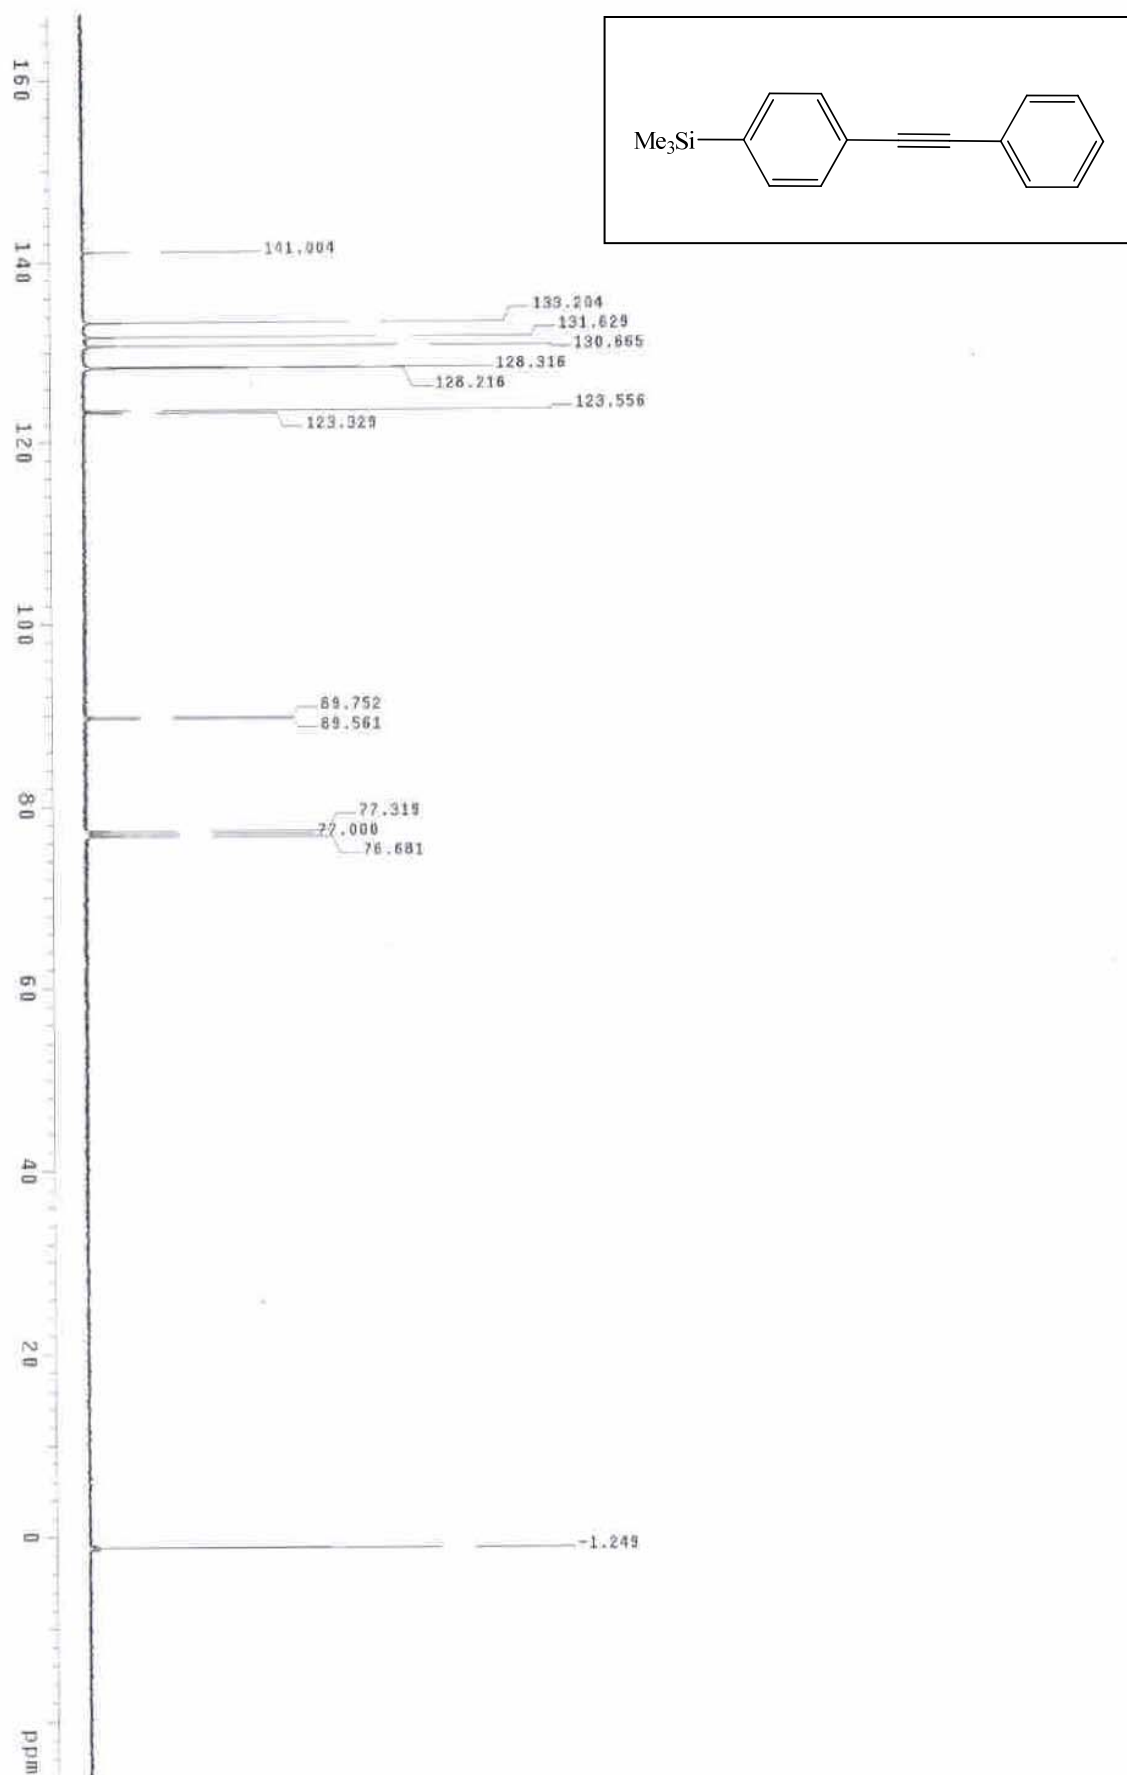

24. 1-fluoro-4-(phenylethynyl)benzene (**2x**)

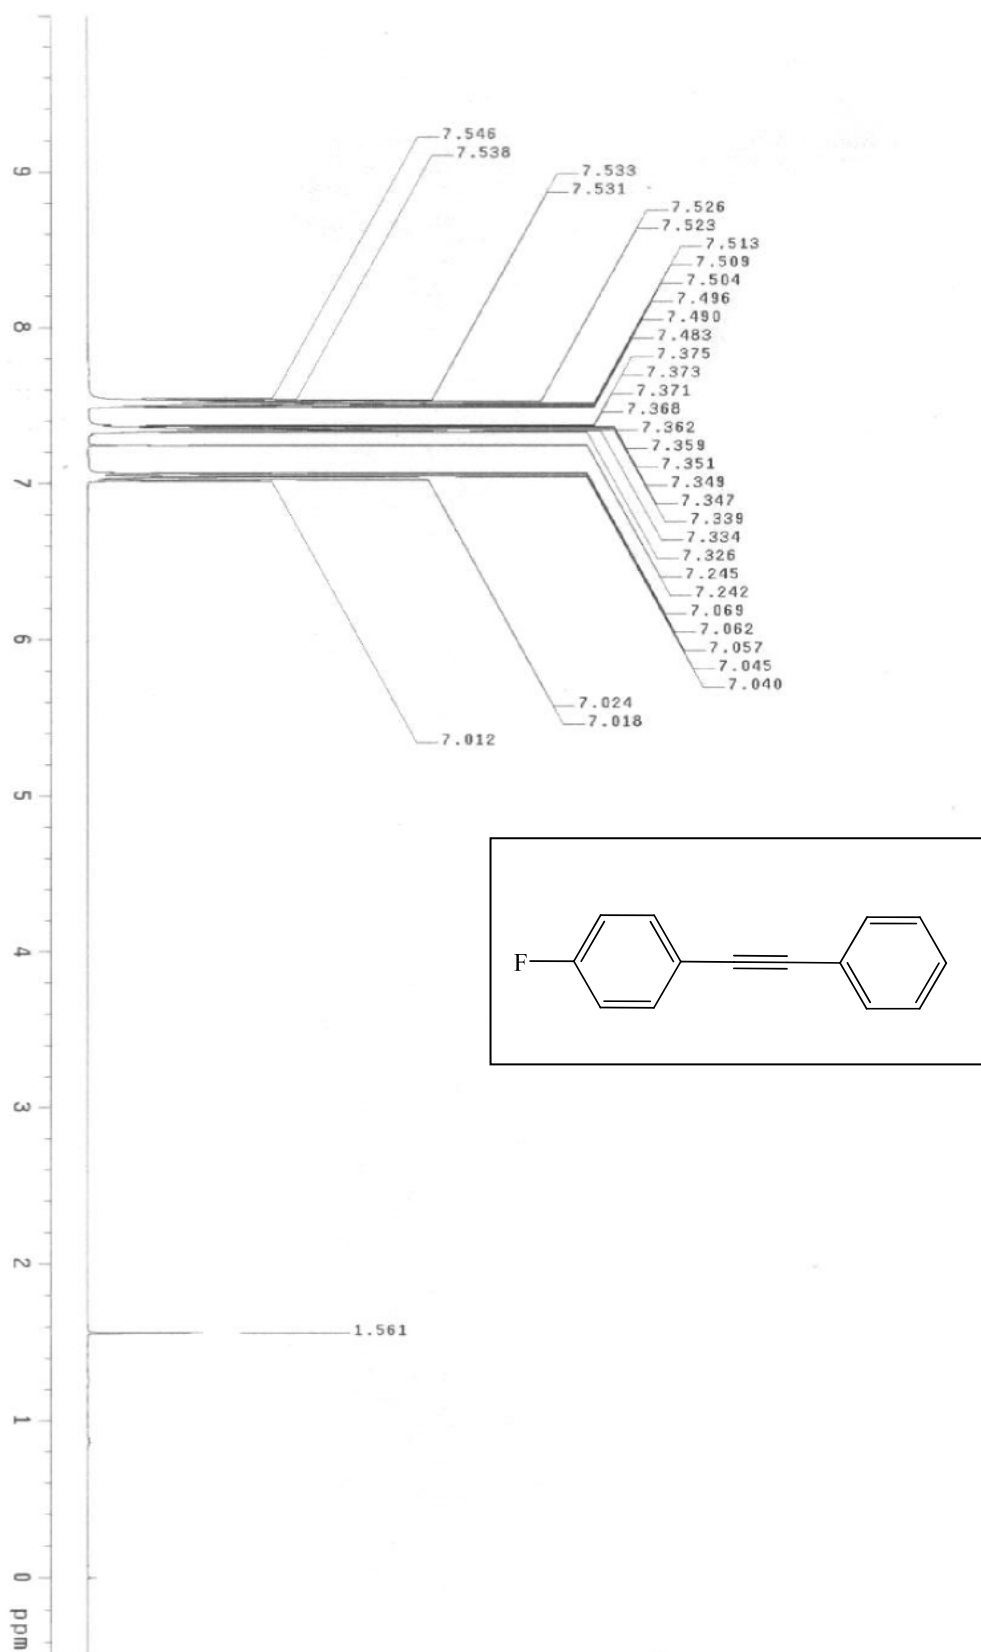

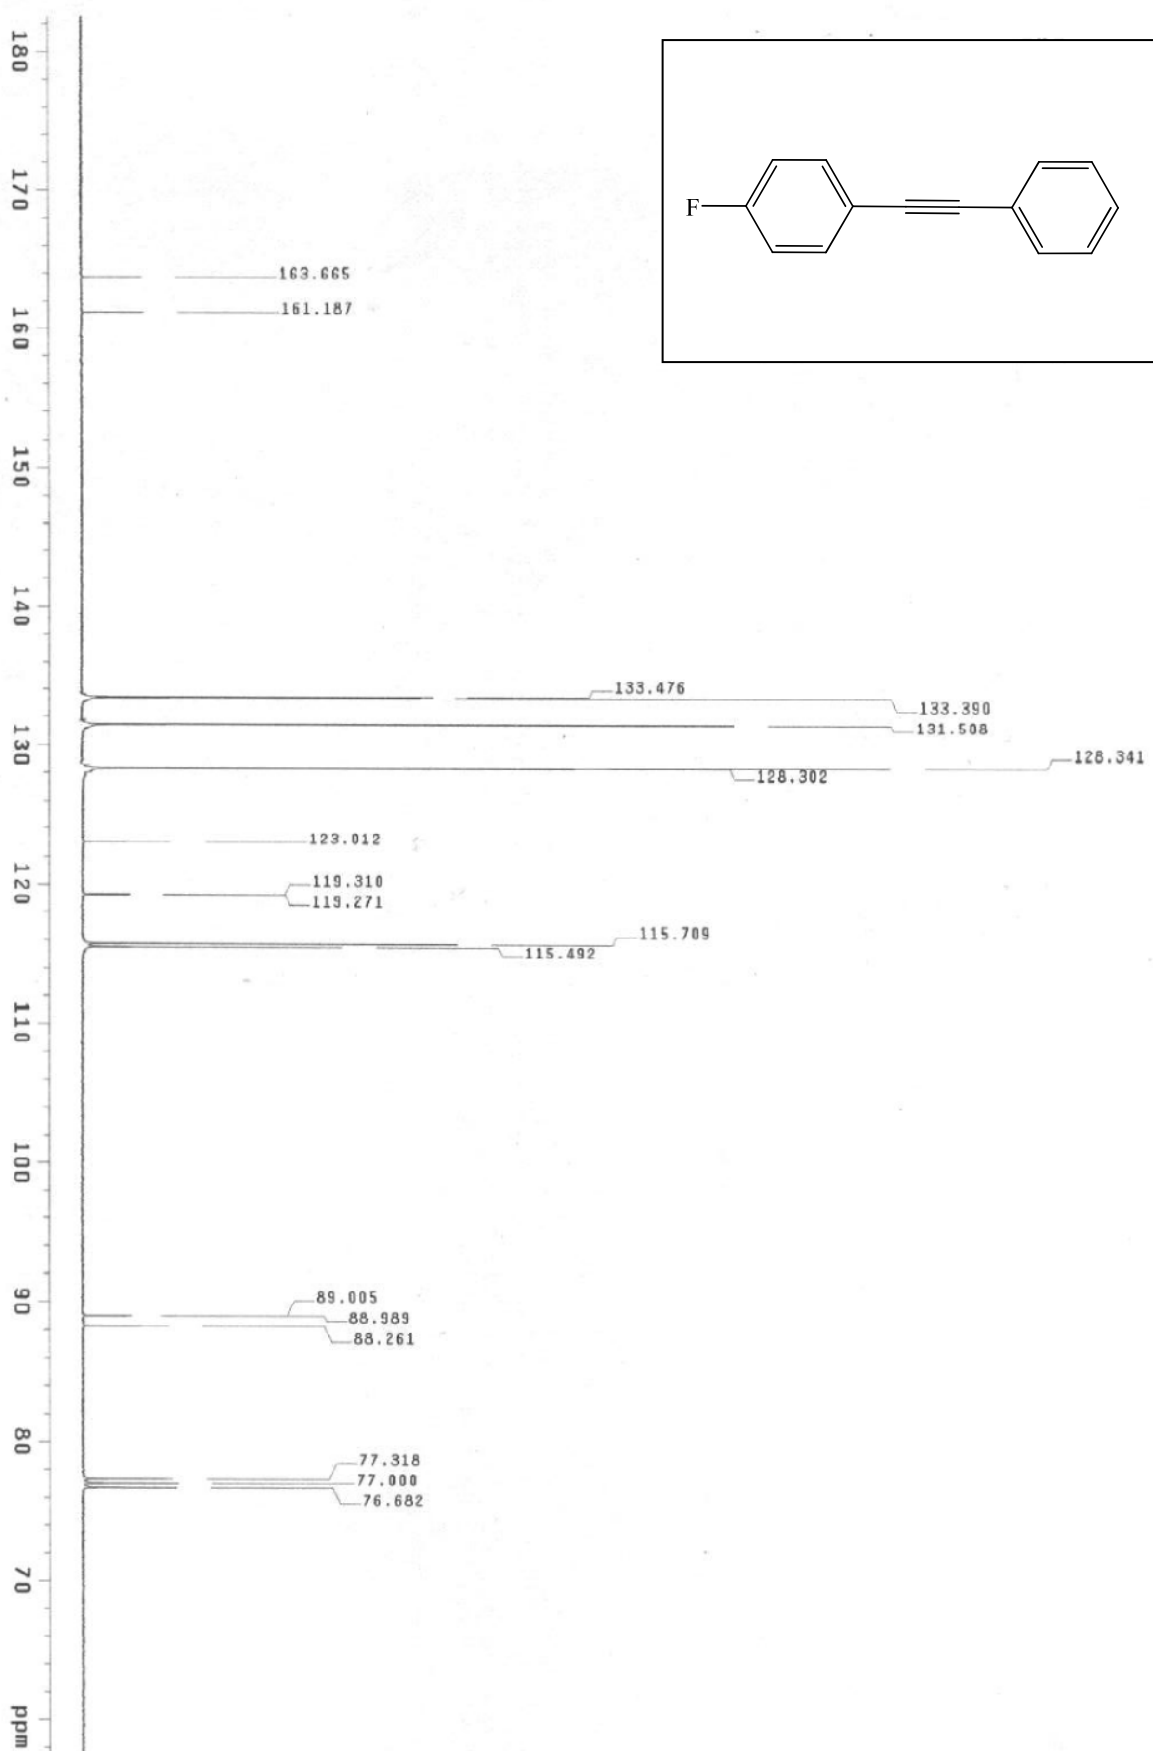

25. 4-(phenylethynyl)benzonitrile (**2y**)

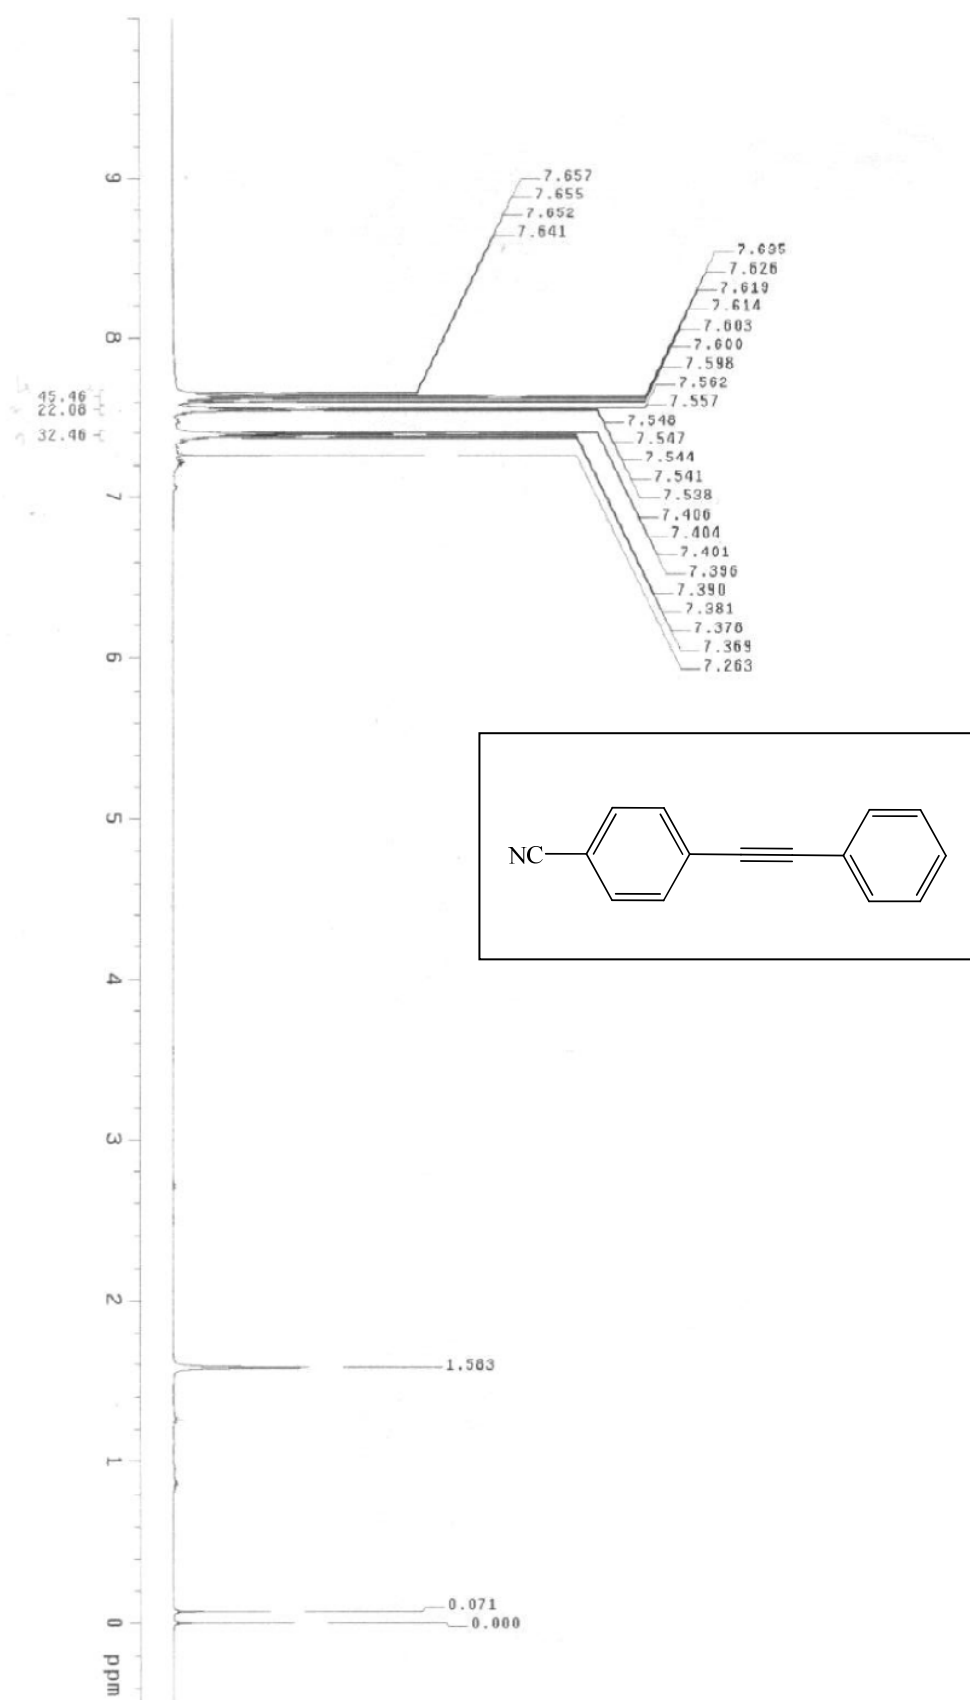

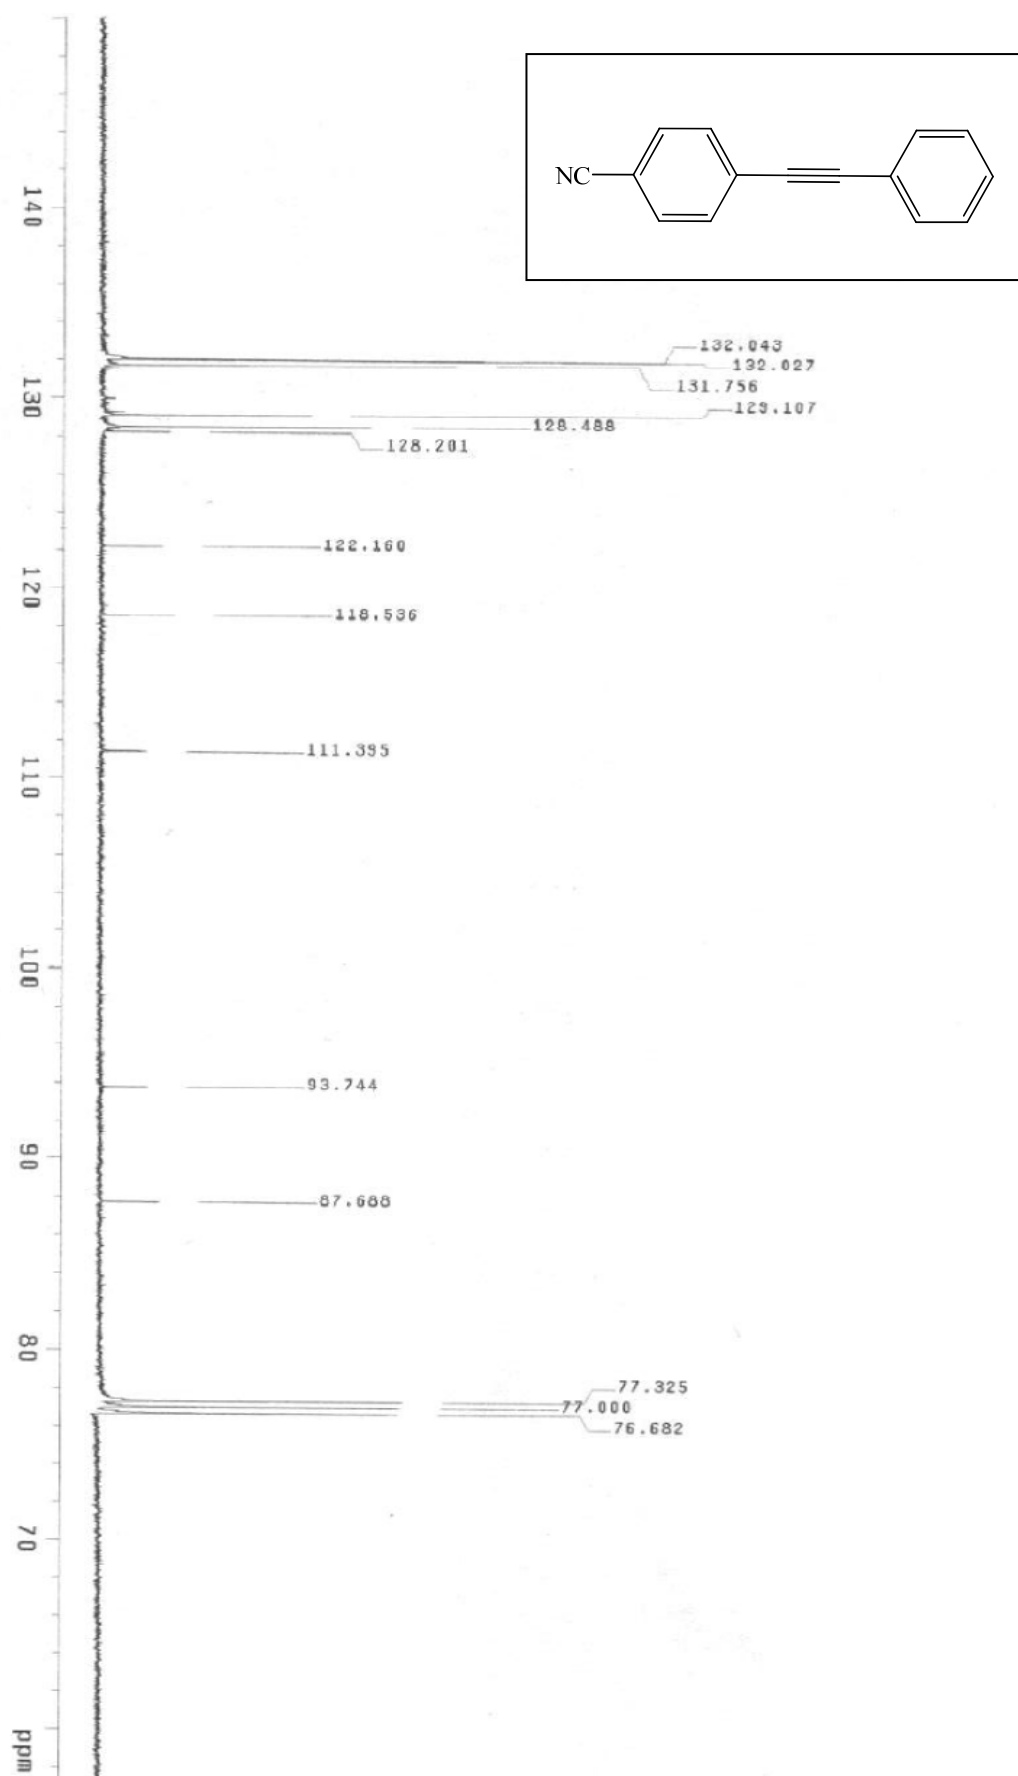

Supplement: c1cc14206b.pdf [file c1cc14206b.pdf]
